# Supplementary material for: Squaramide-catalysed enantioselective Michael addition of pyrazolin-5-ones to nitroalkenes
Source: Royal Society of Chemistry journal article supplement (doi:10.1039/c3ob41045e), 2013-01-01
Supplement: c3ob41045e.pdf [file c3ob41045e.pdf]

# Squaramide-catalysed Enantioselective Michael Addition of Pyrazolin-5-ones to Nitroalkenes

Jun-Hua Li, Da-Ming Du\*

*School of Chemical Engineering and Environment, Beijing Institute of Technology,  
Beijing 100081, People's Republic of China*

[dudm@bit.edu.cn](mailto:dudm@bit.edu.cn)

## *Supporting Information*

### **Contents**

|                                                                         |     |
|-------------------------------------------------------------------------|-----|
| Copies of $^1\text{H}$ and $^{13}\text{C}$ NMR spectra of products..... | S1  |
| Copies of HPLC chromatographs of products.....                          | S24 |

### Copies of $^1\text{H}$ and $^{13}\text{C}$ NMR spectra of products

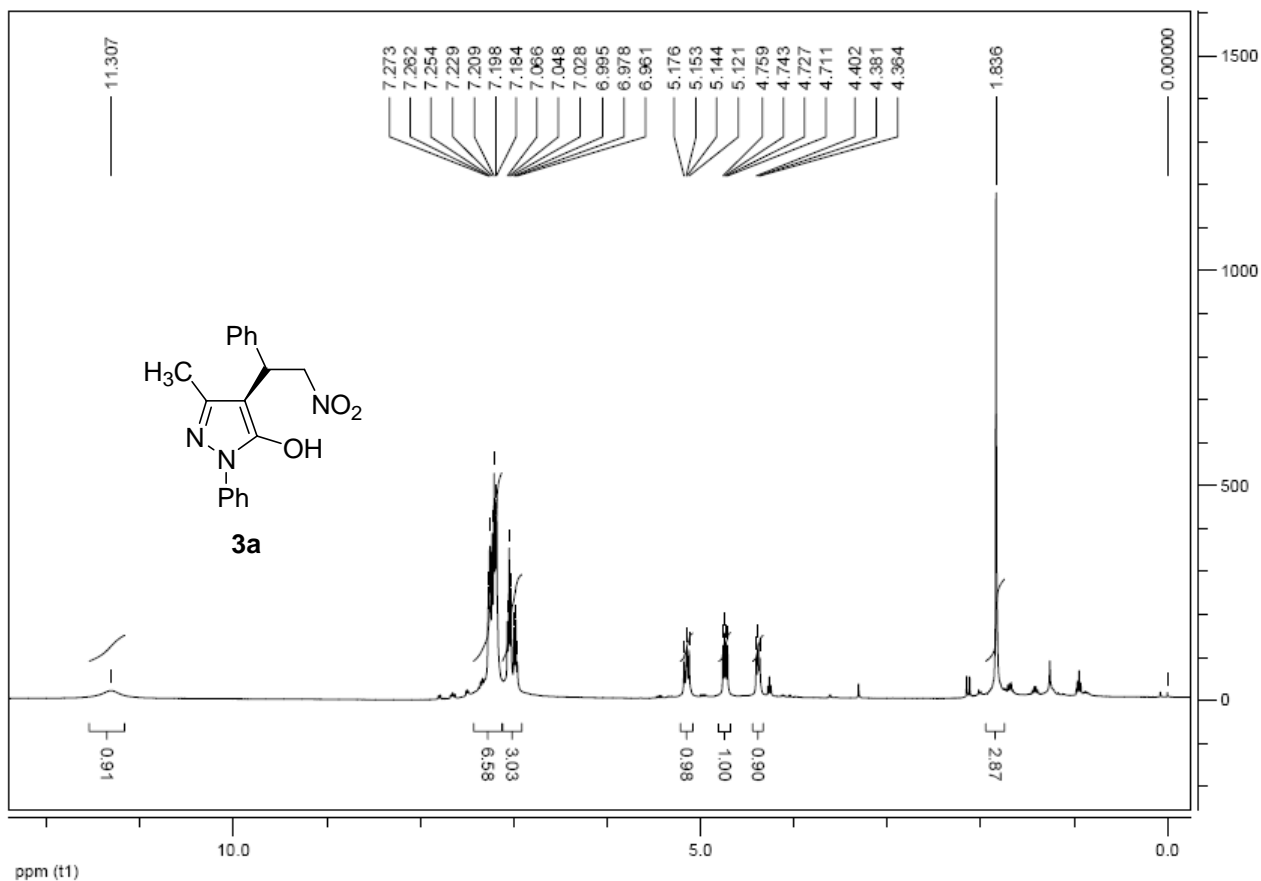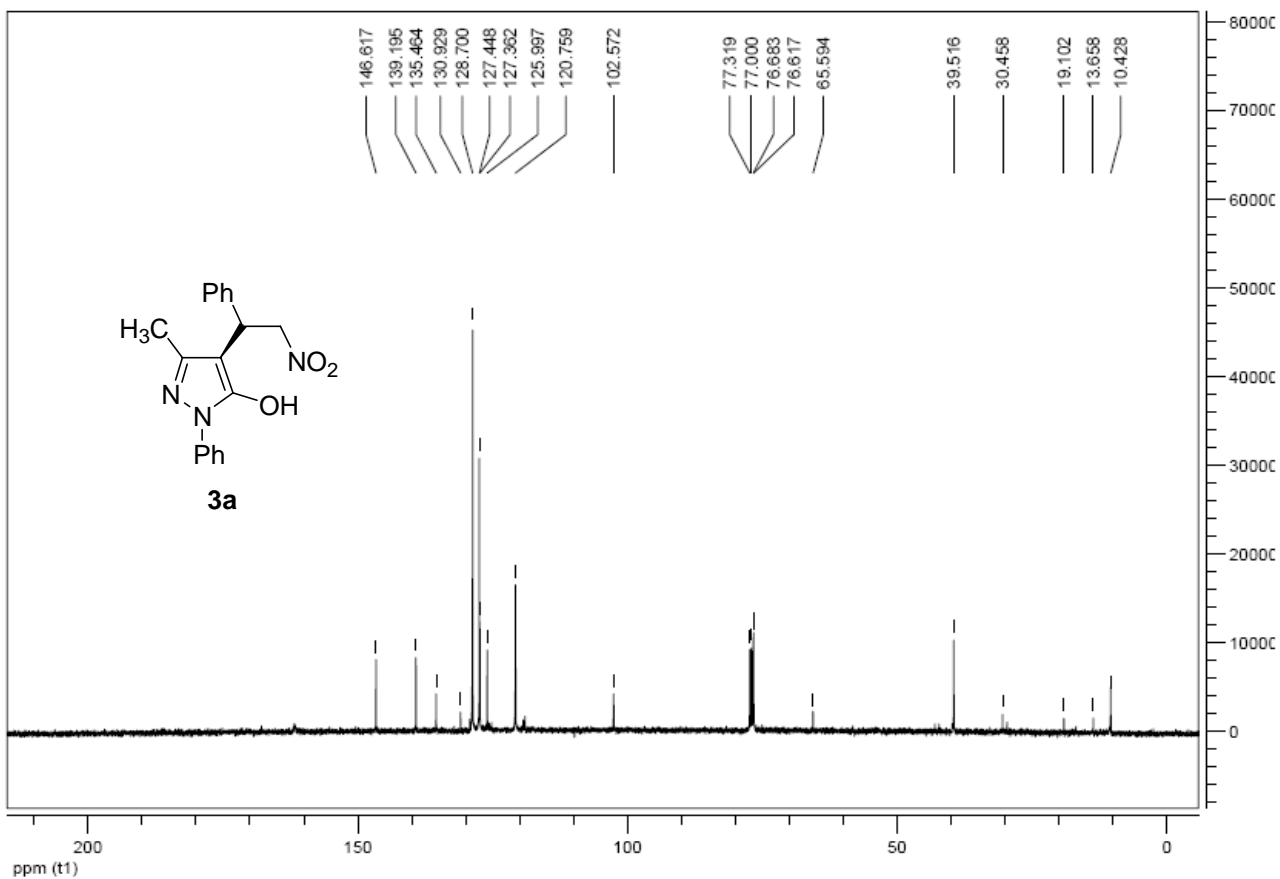

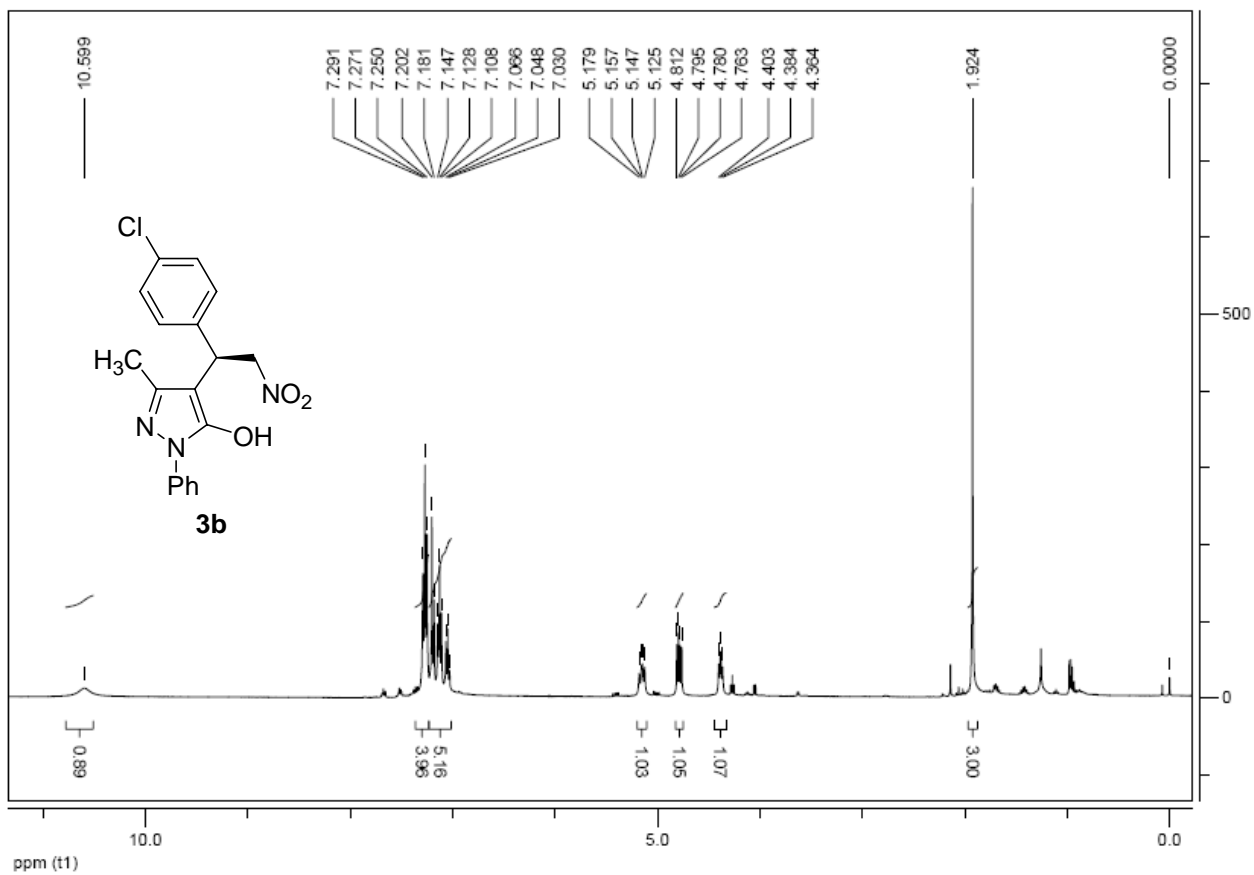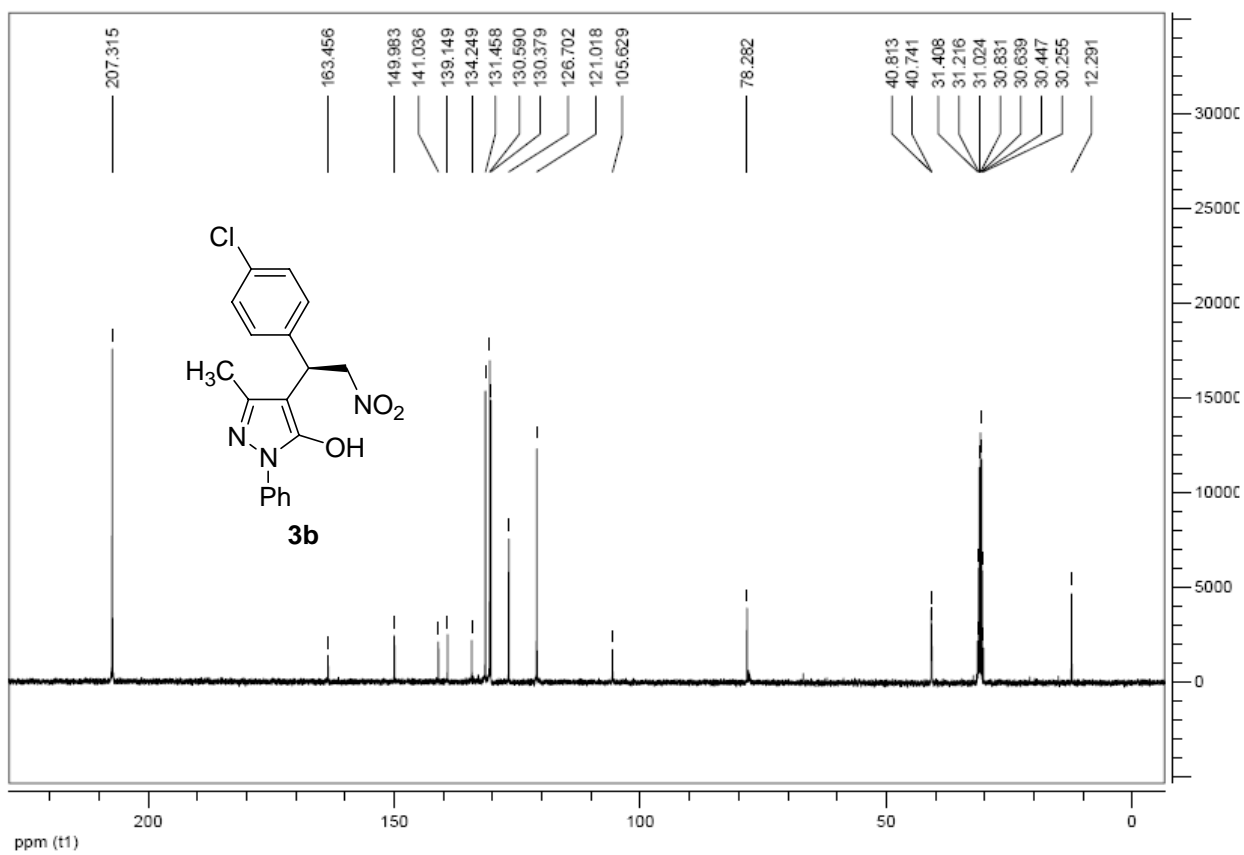

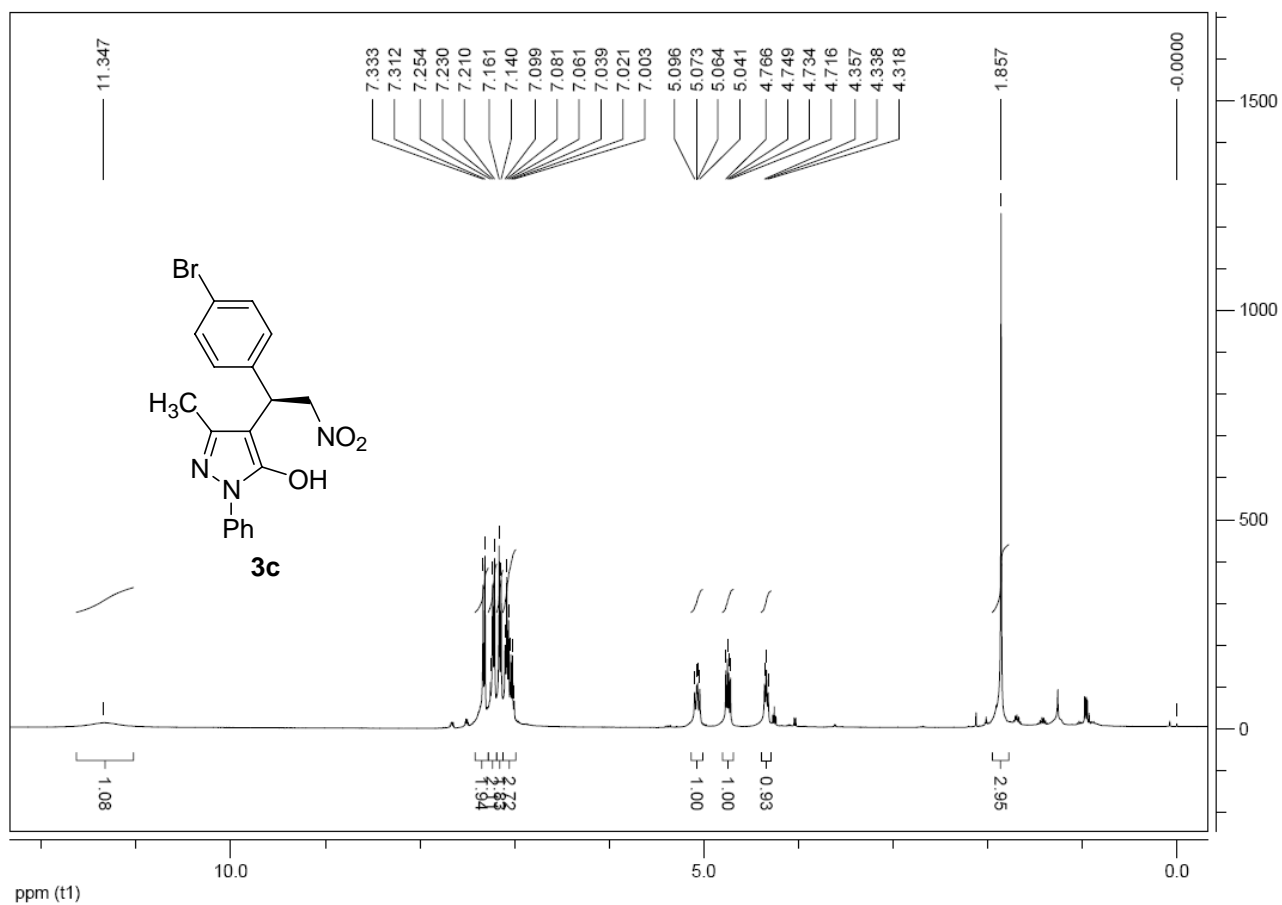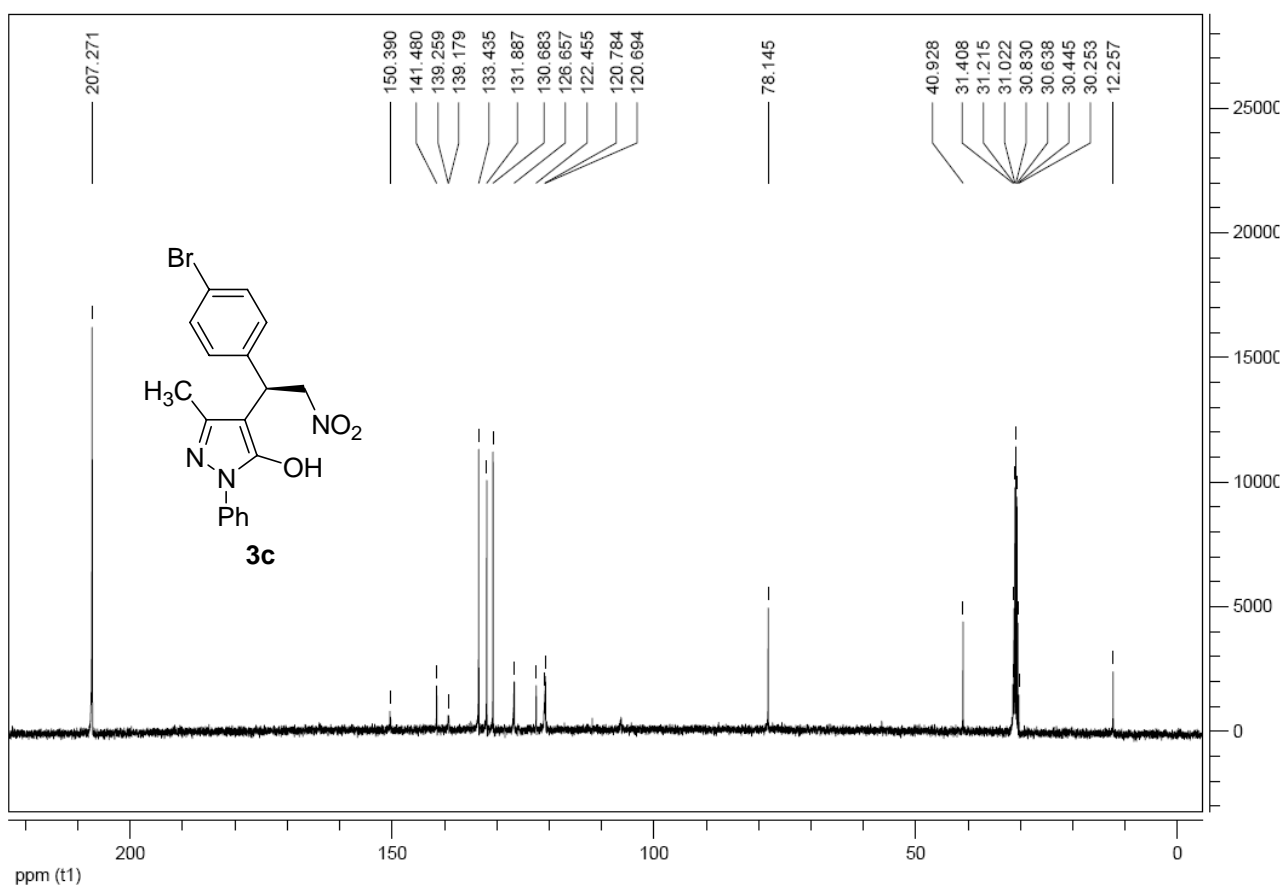

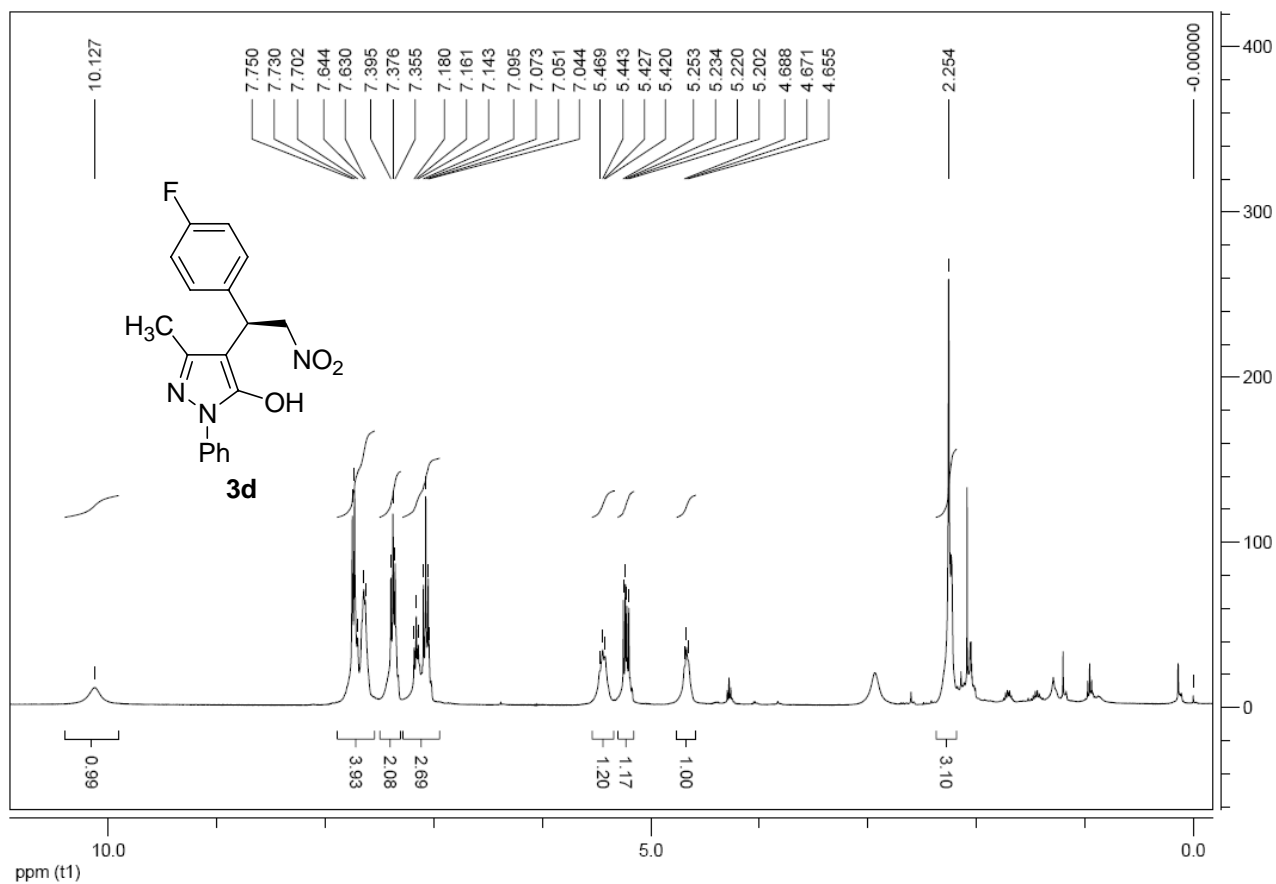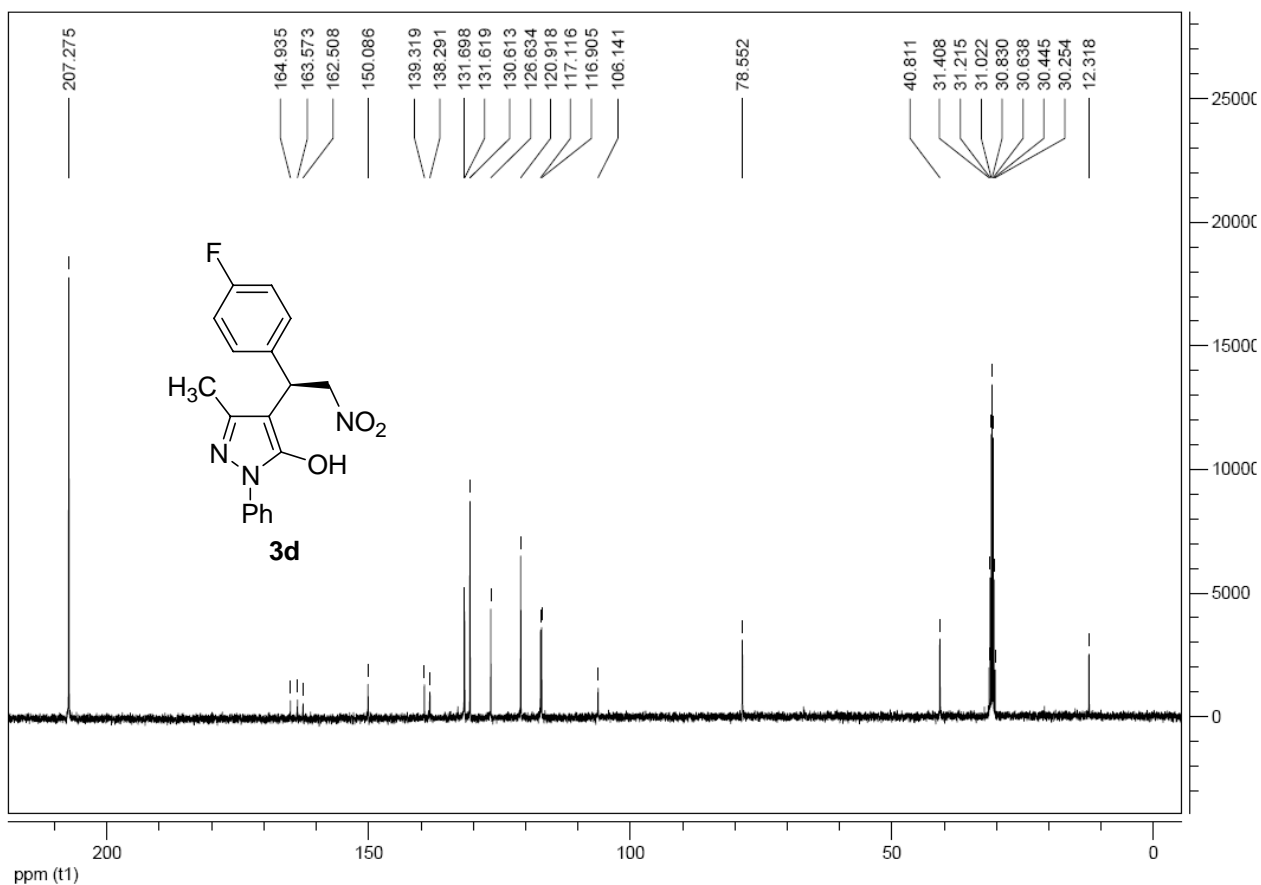

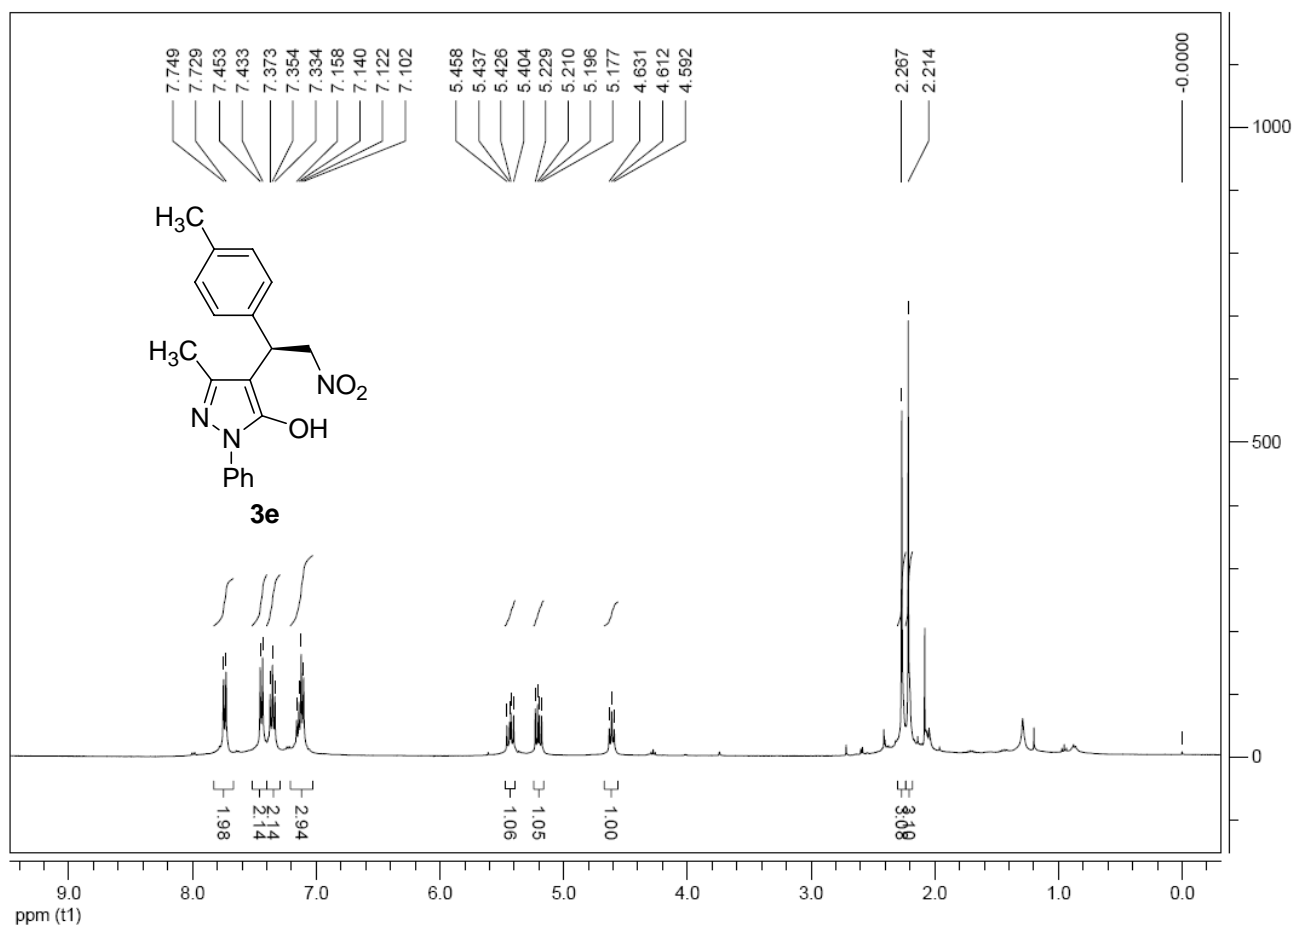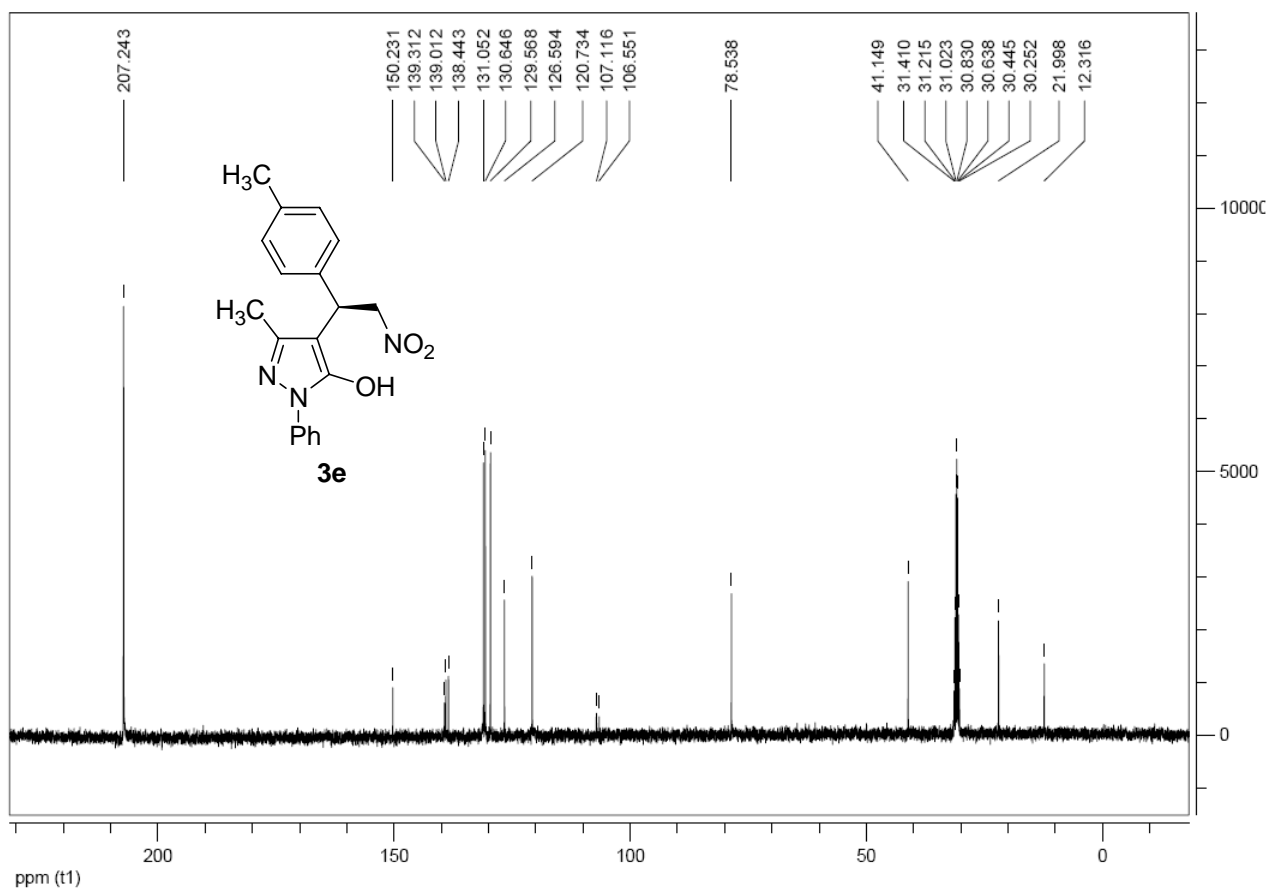

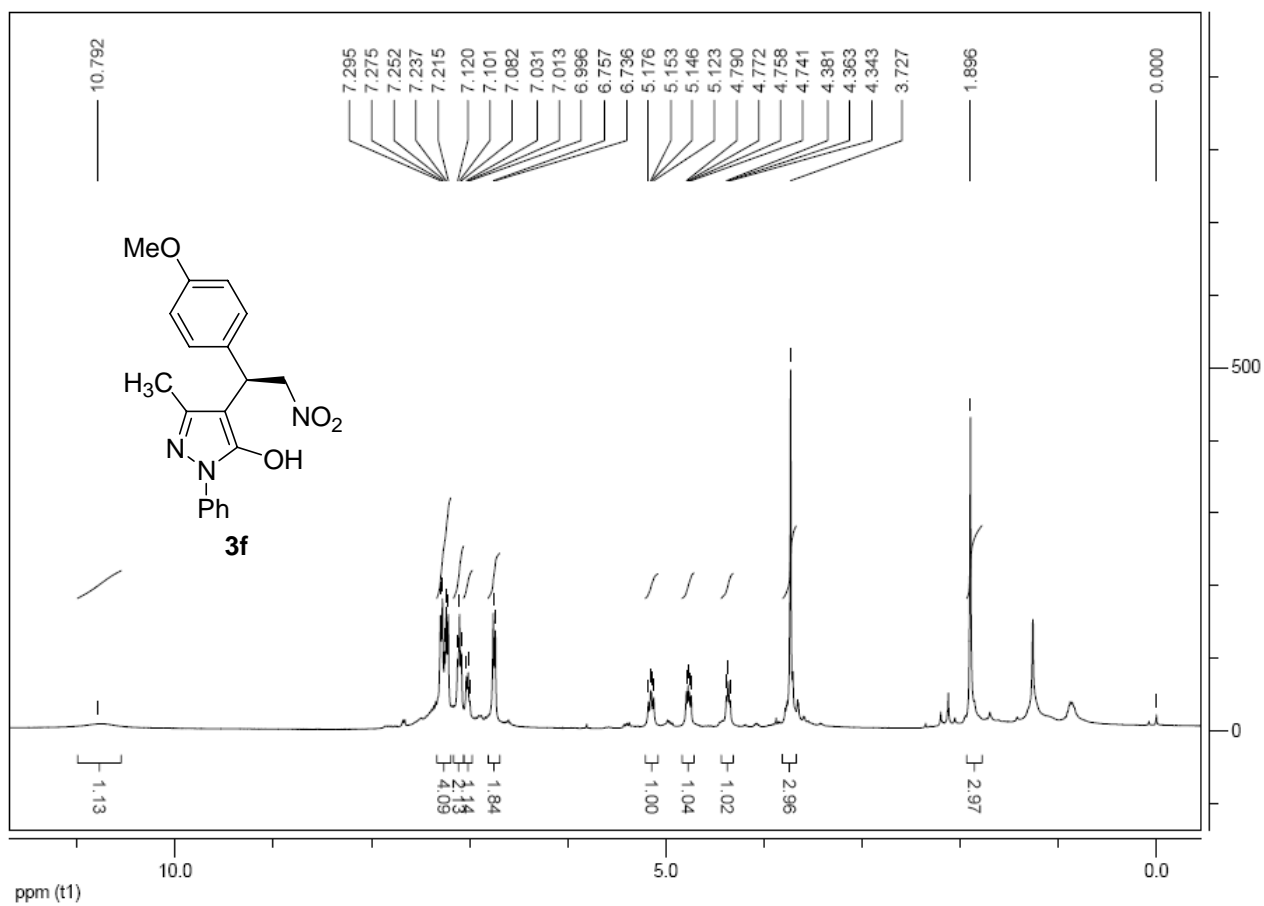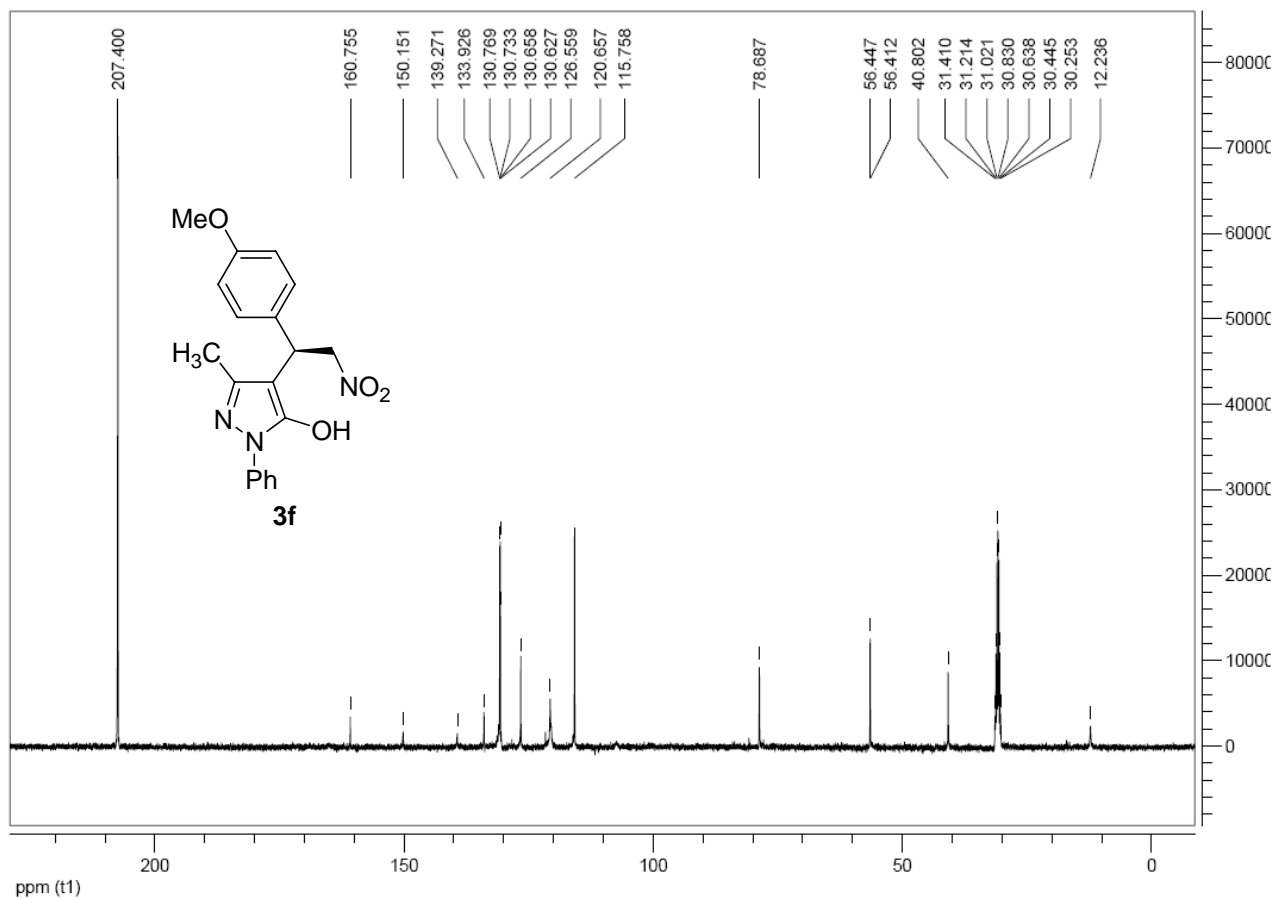

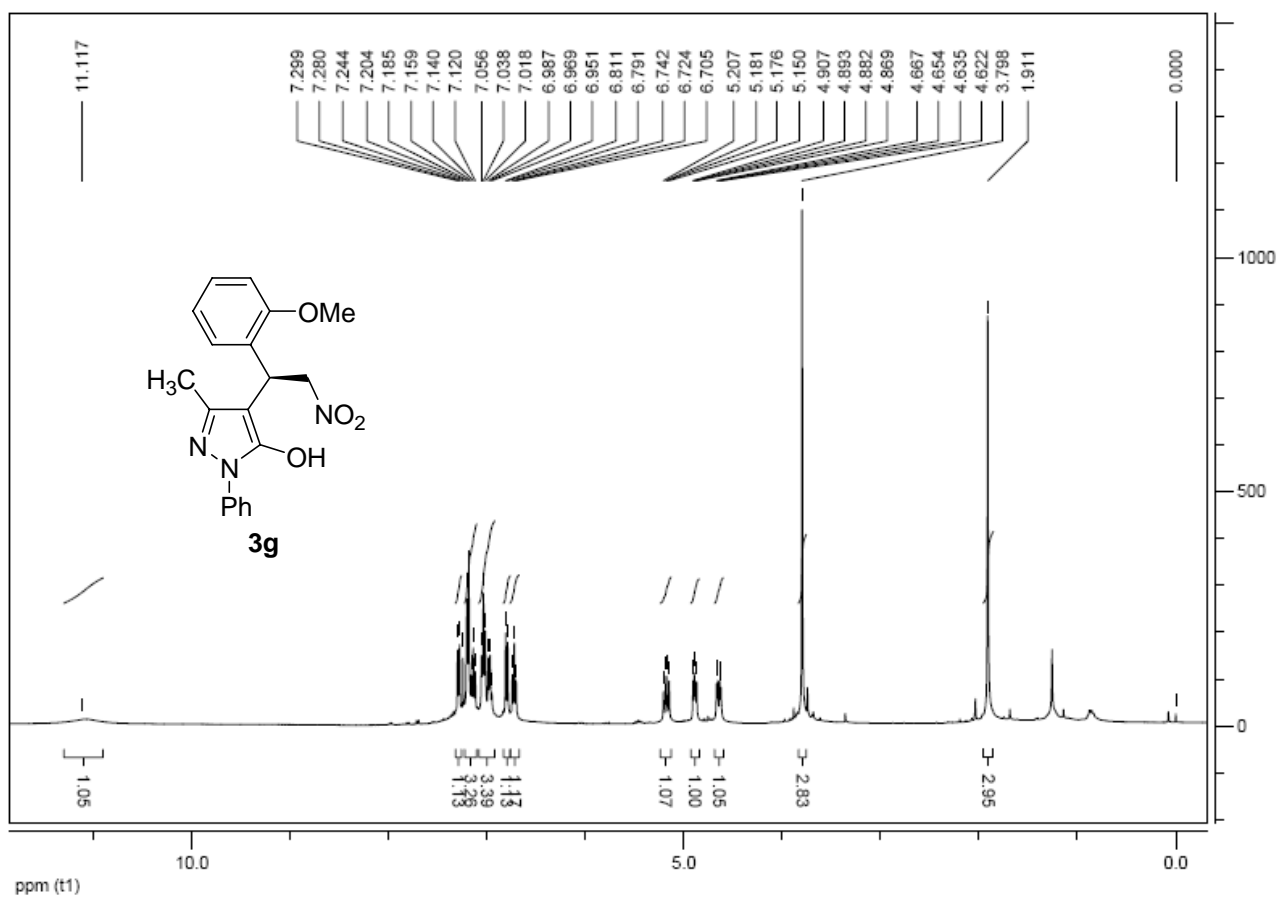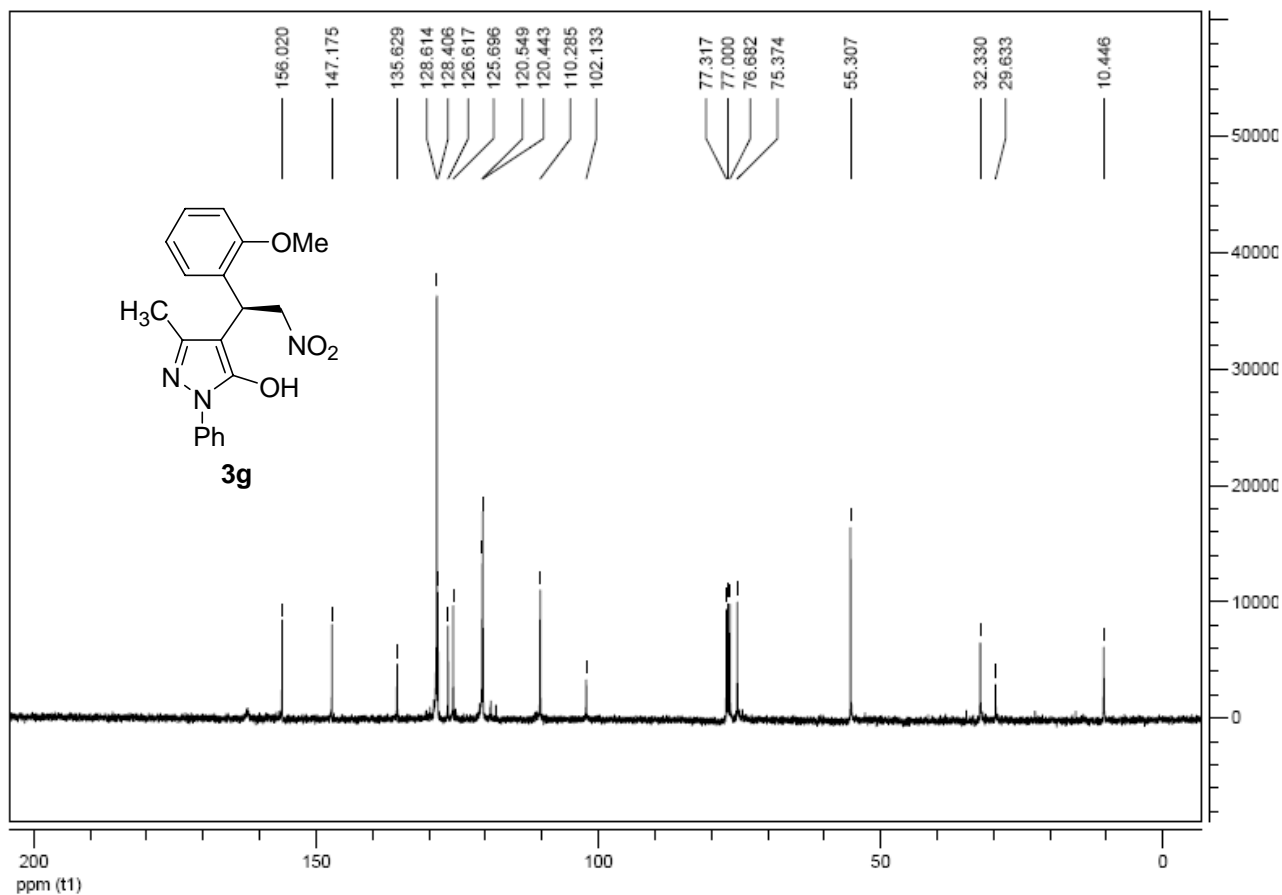



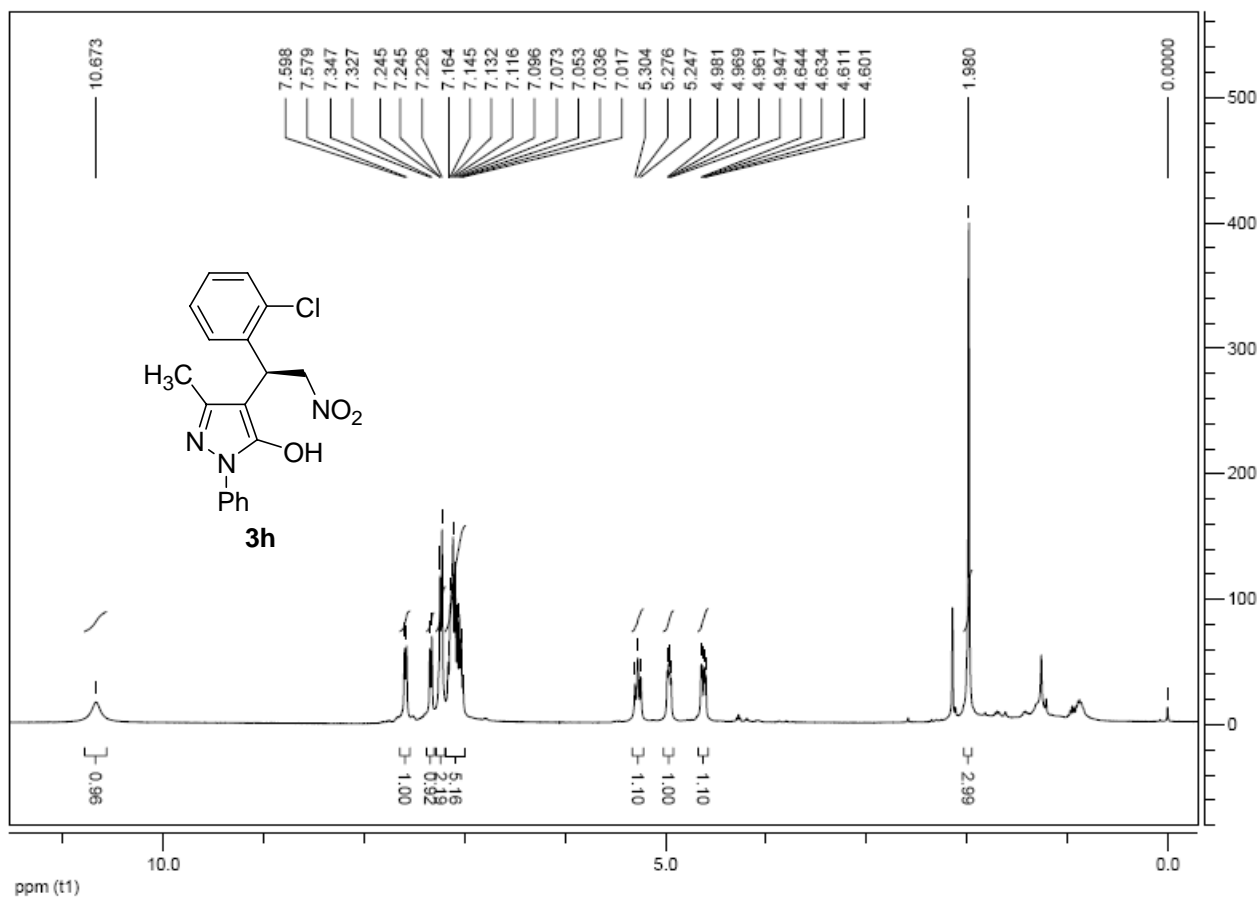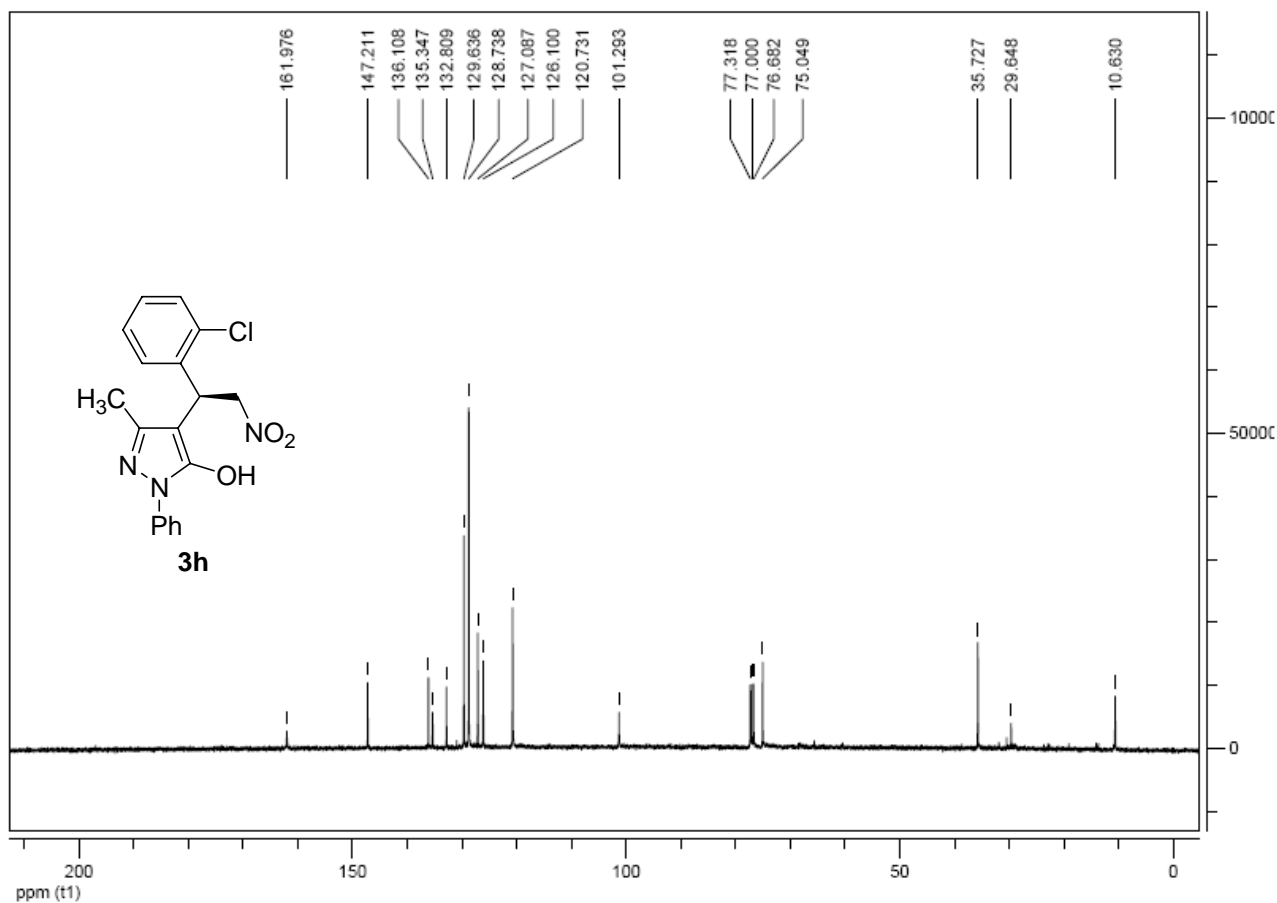

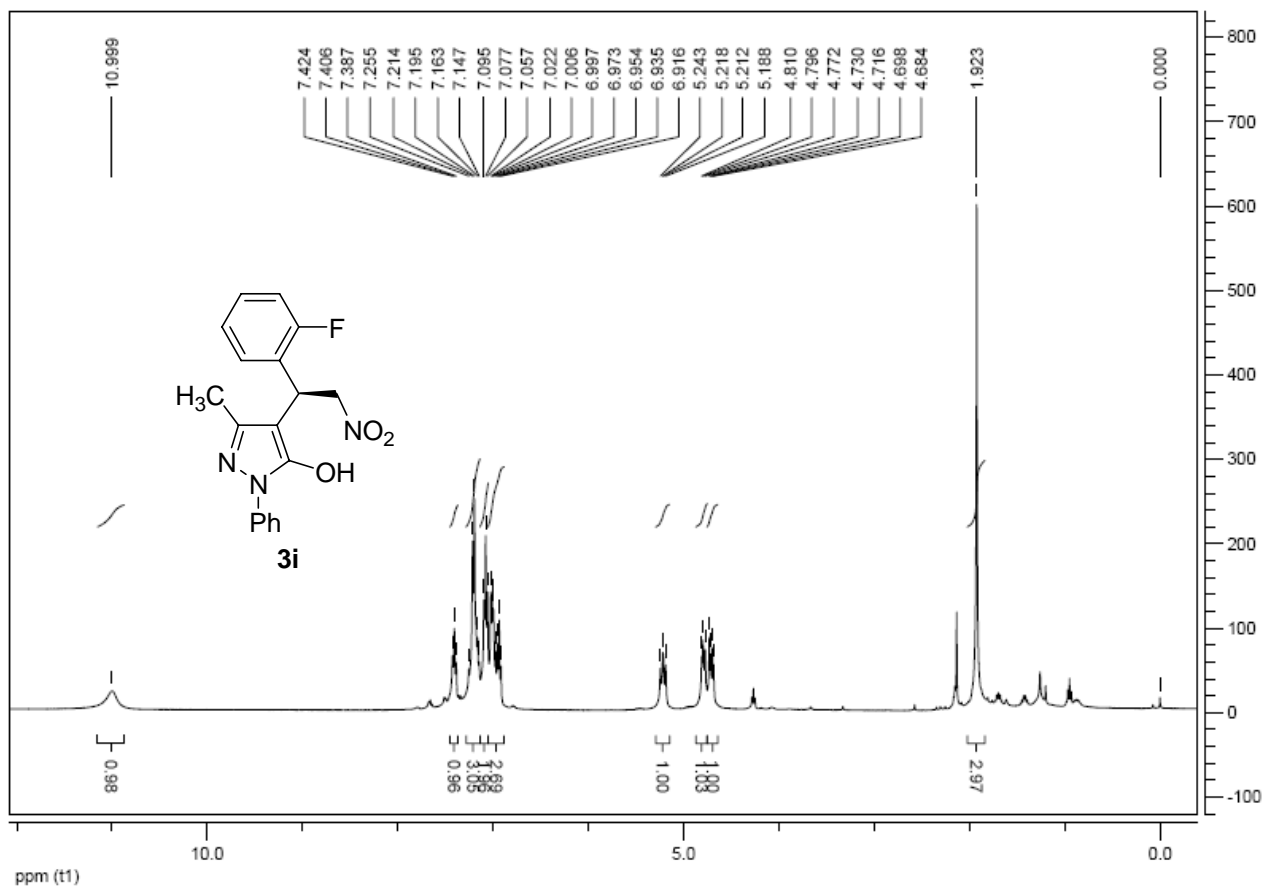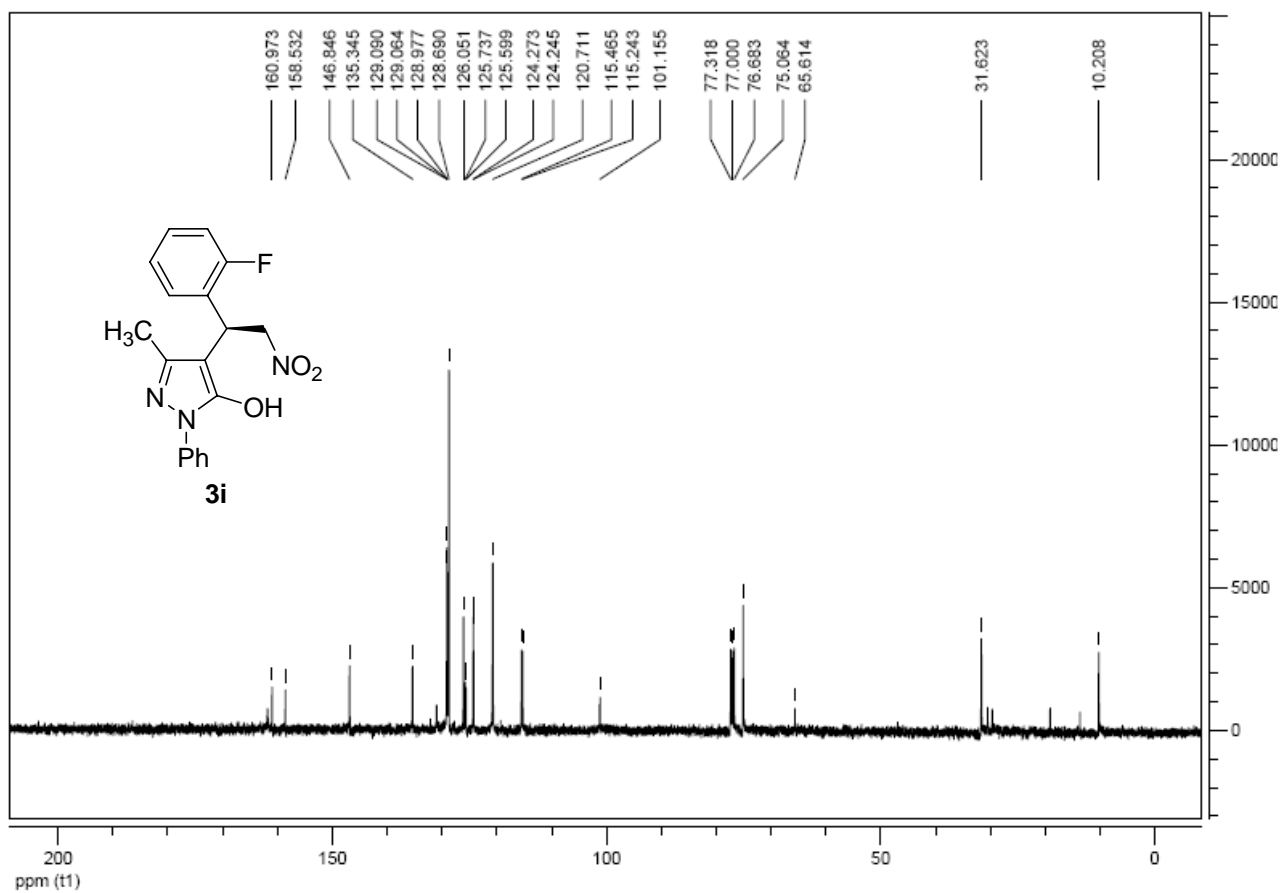

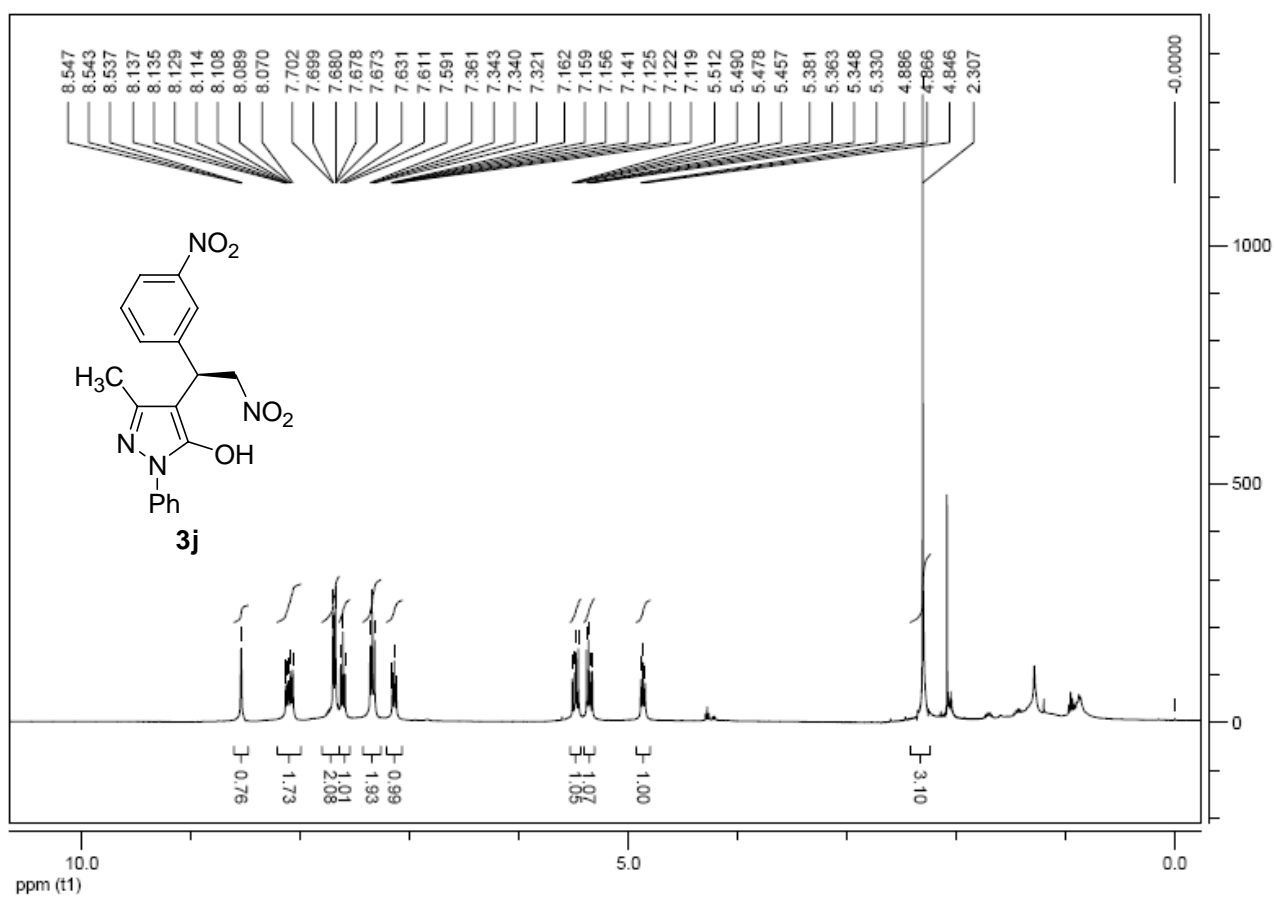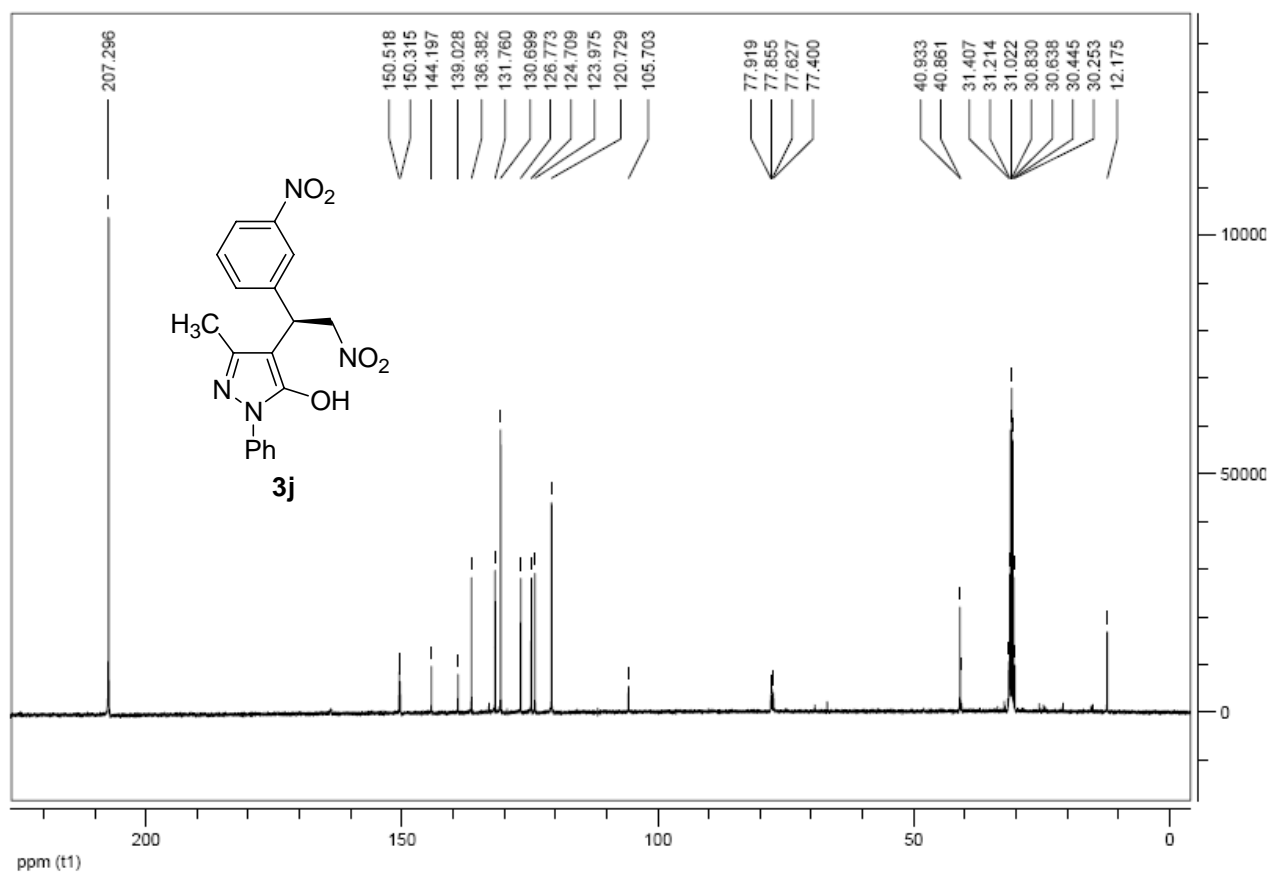

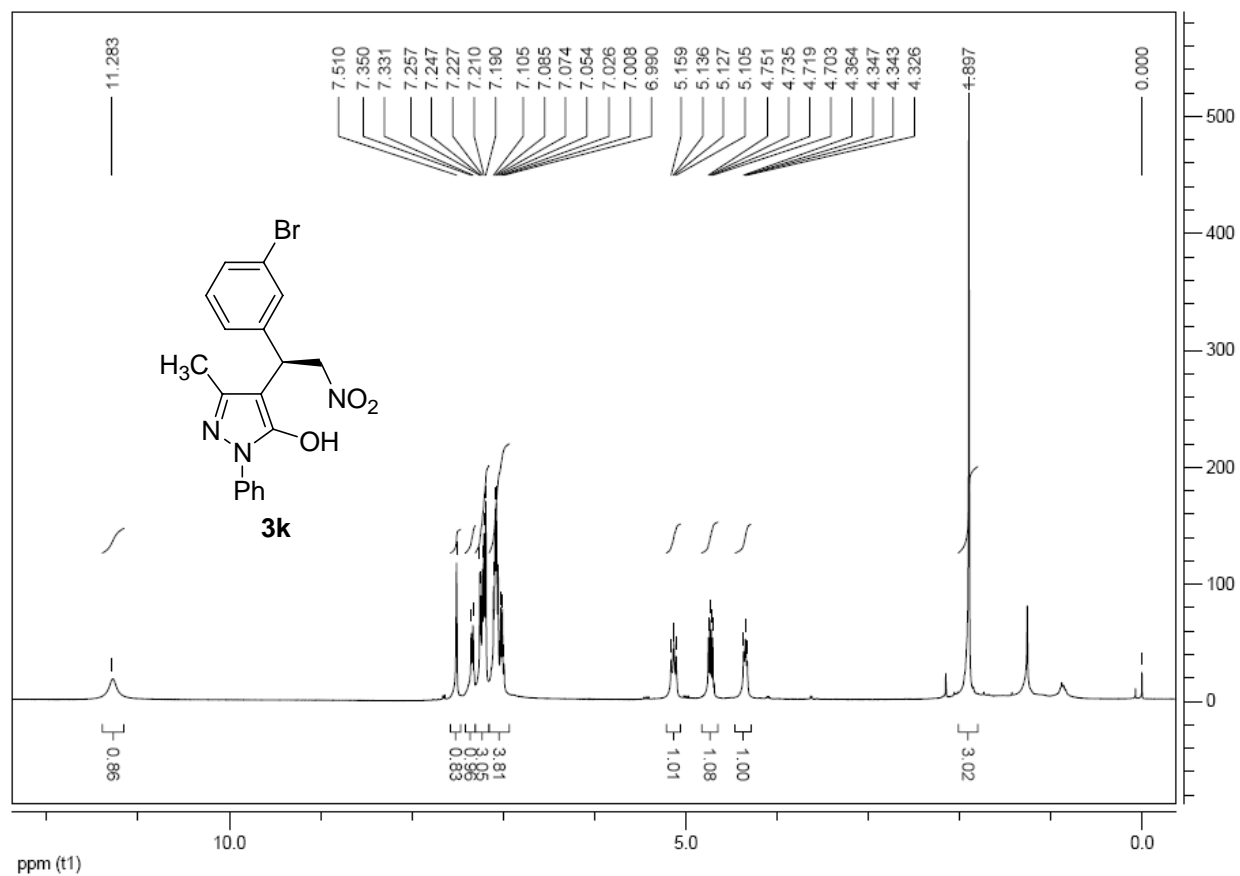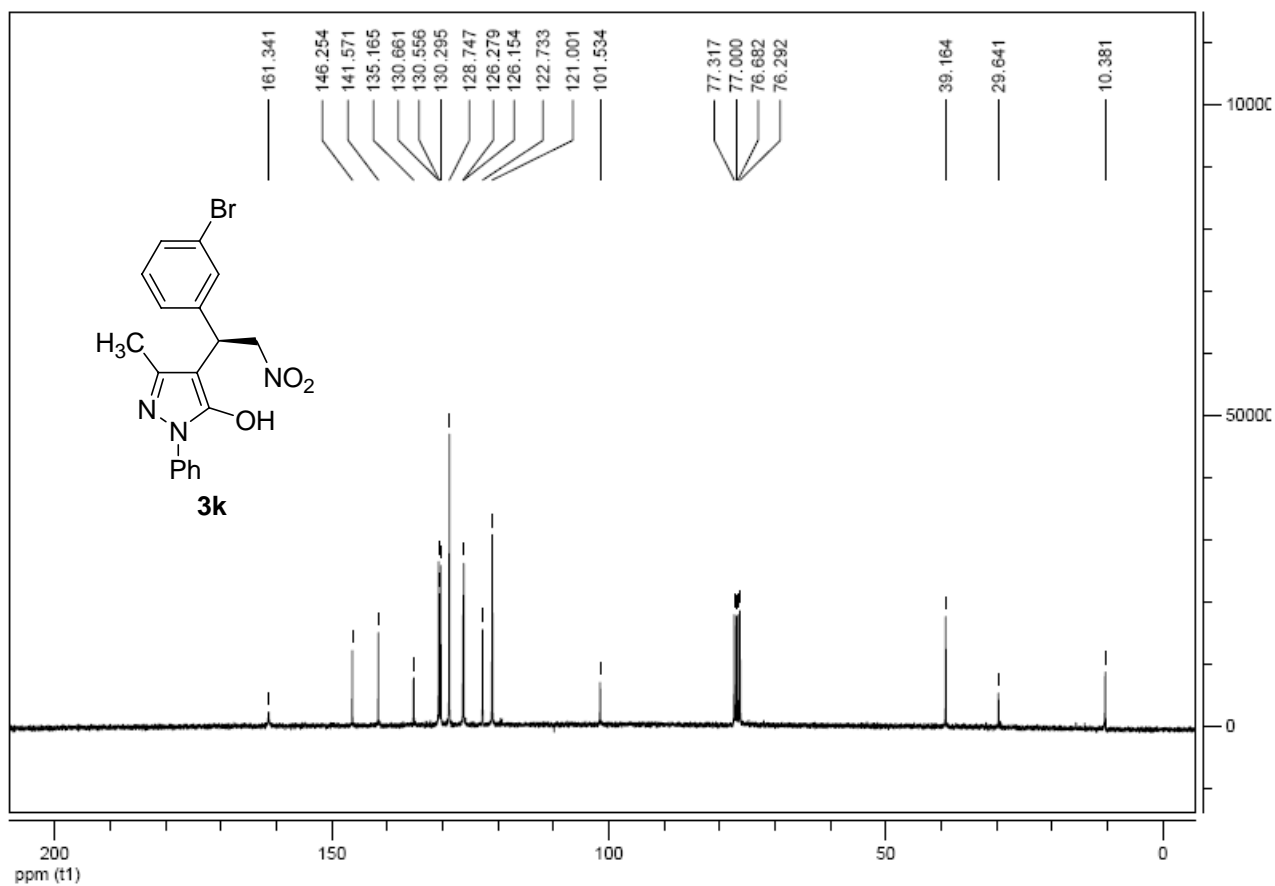

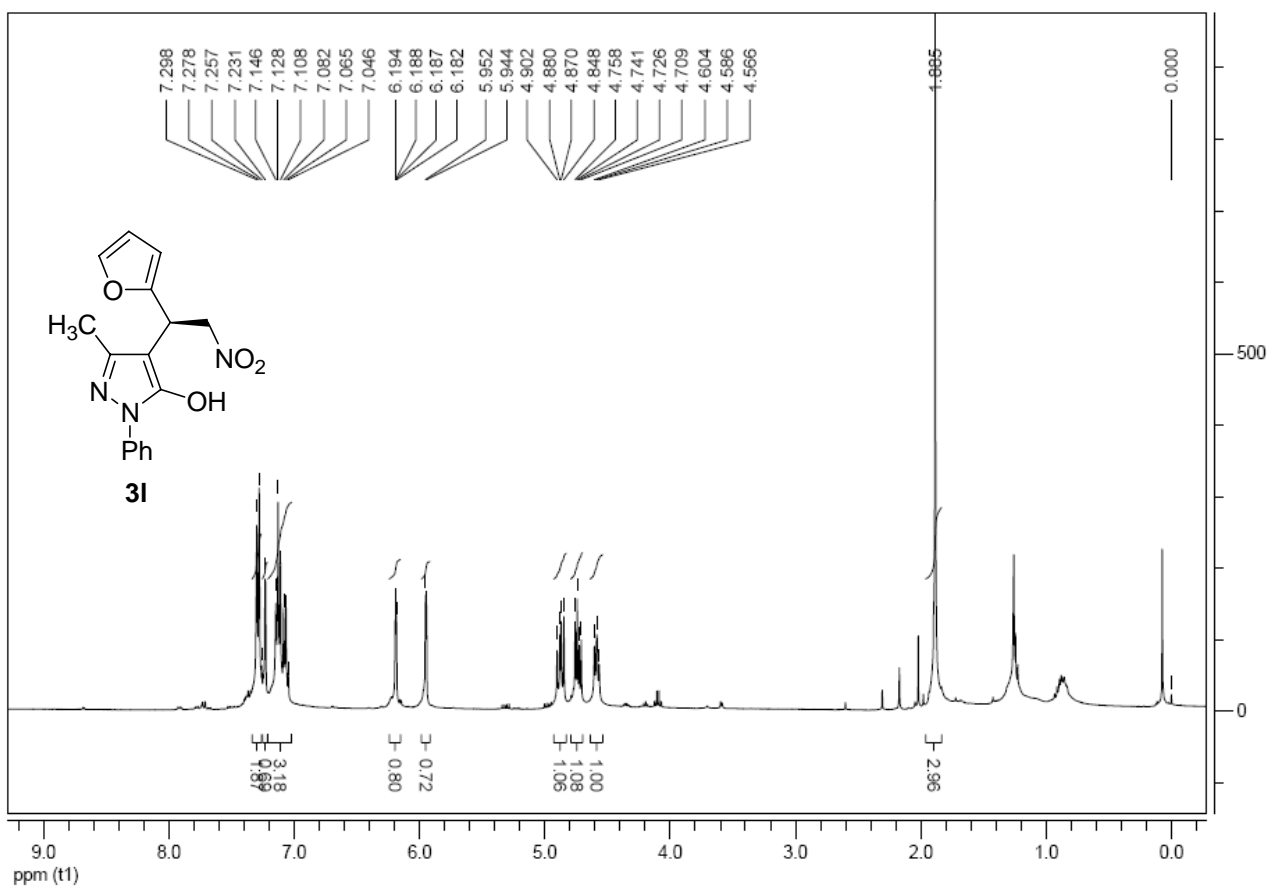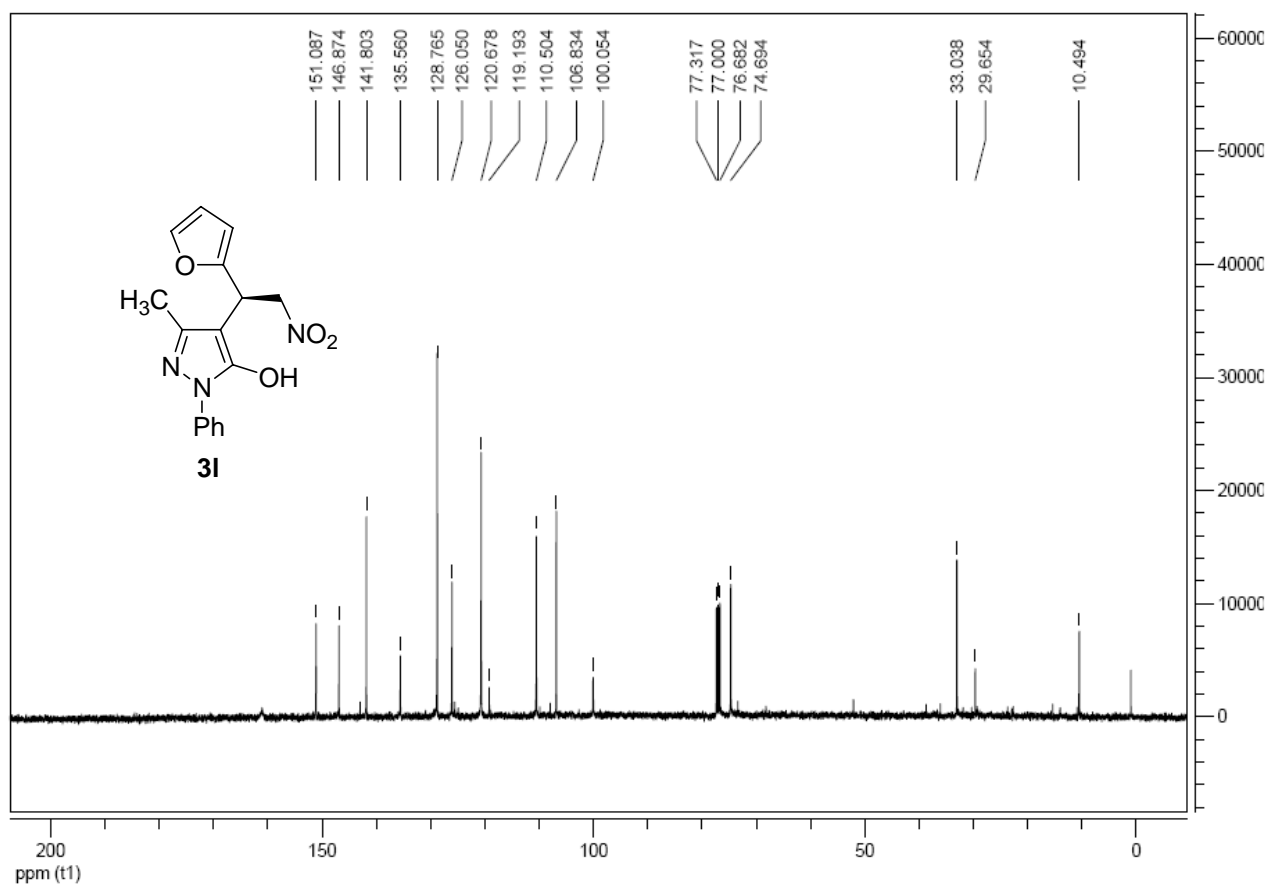

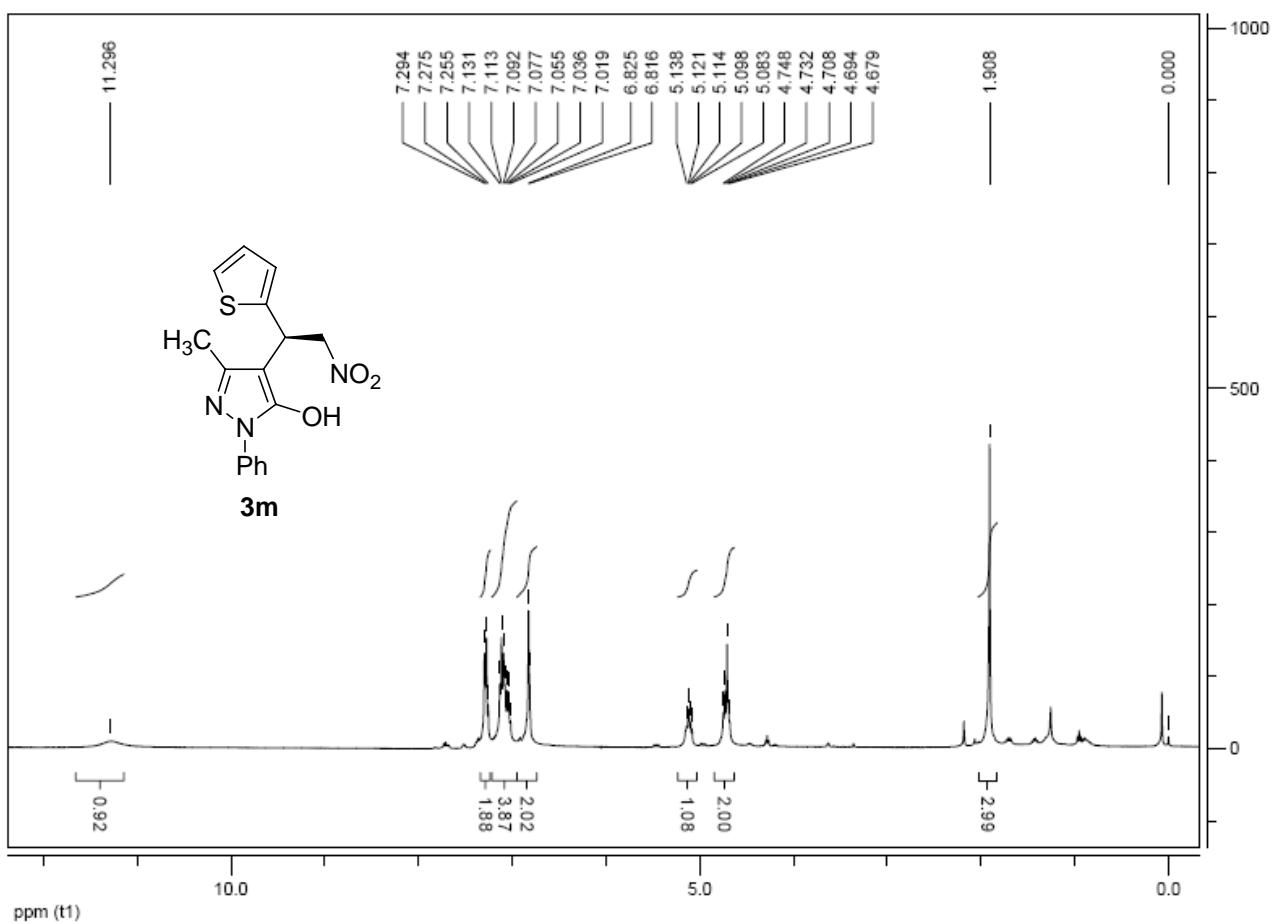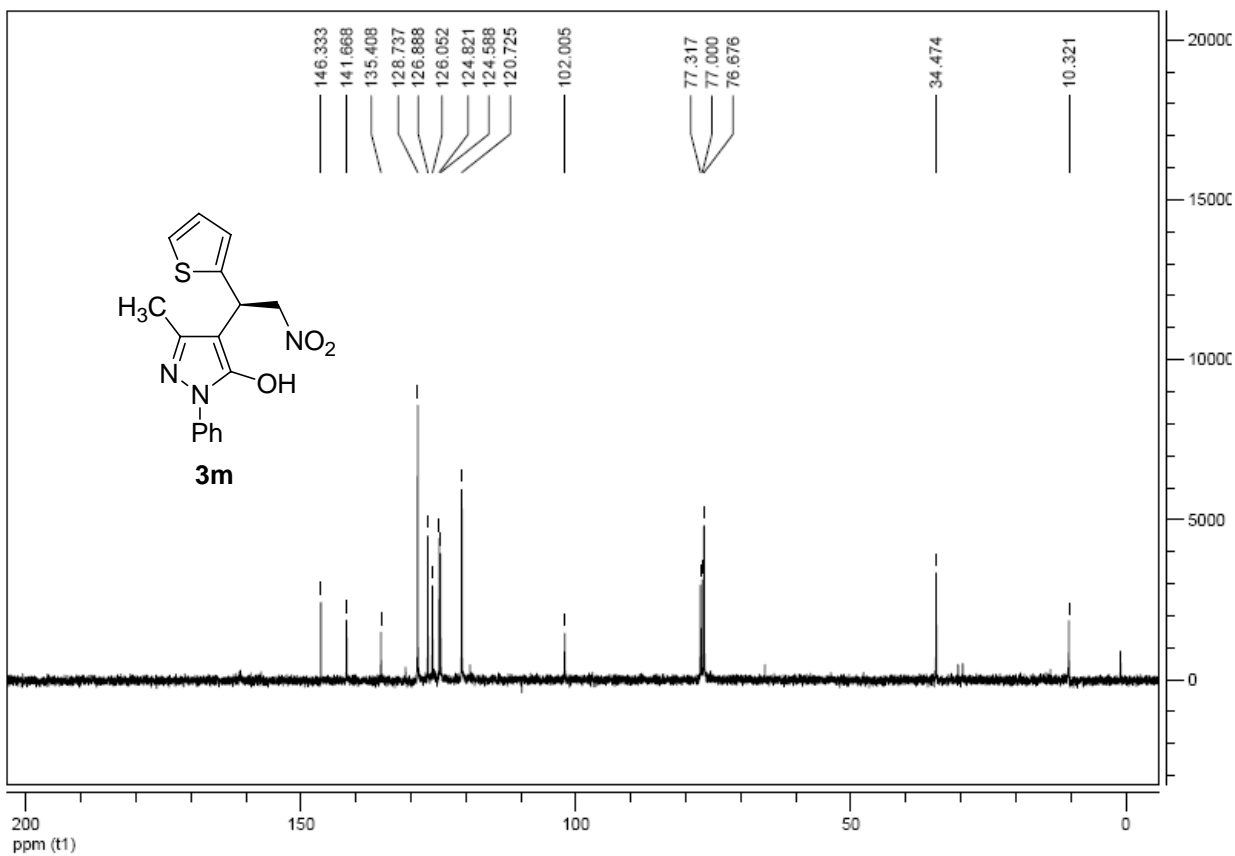

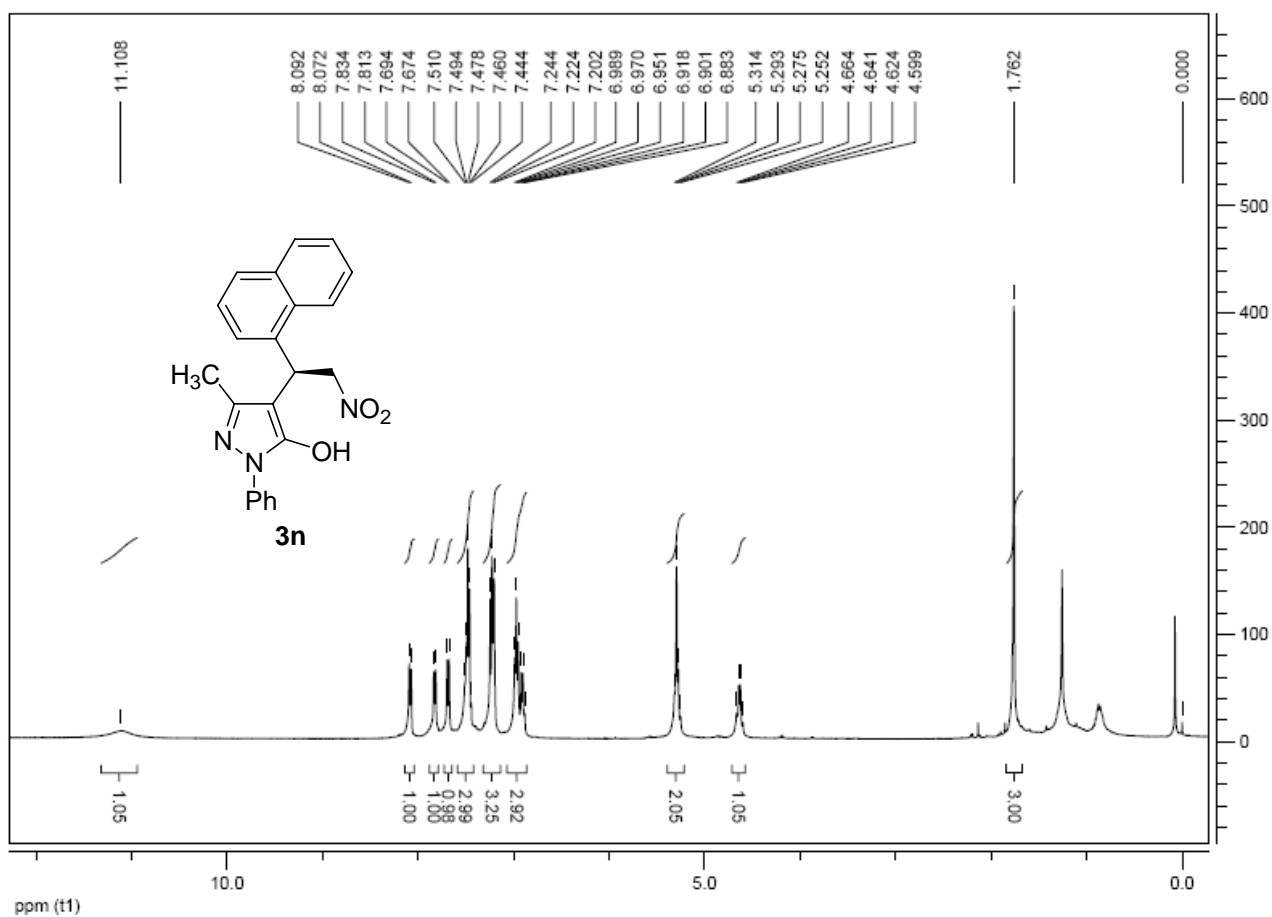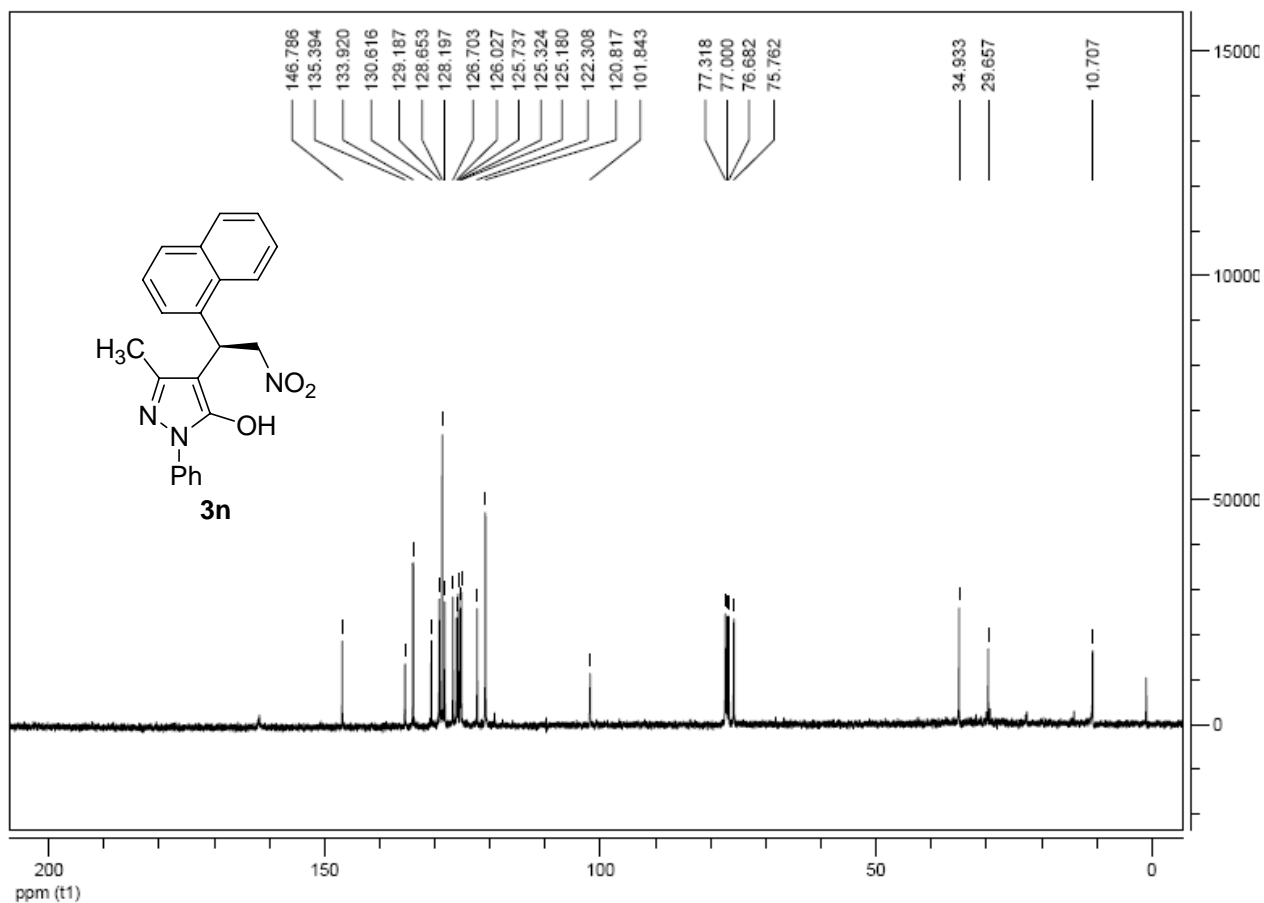

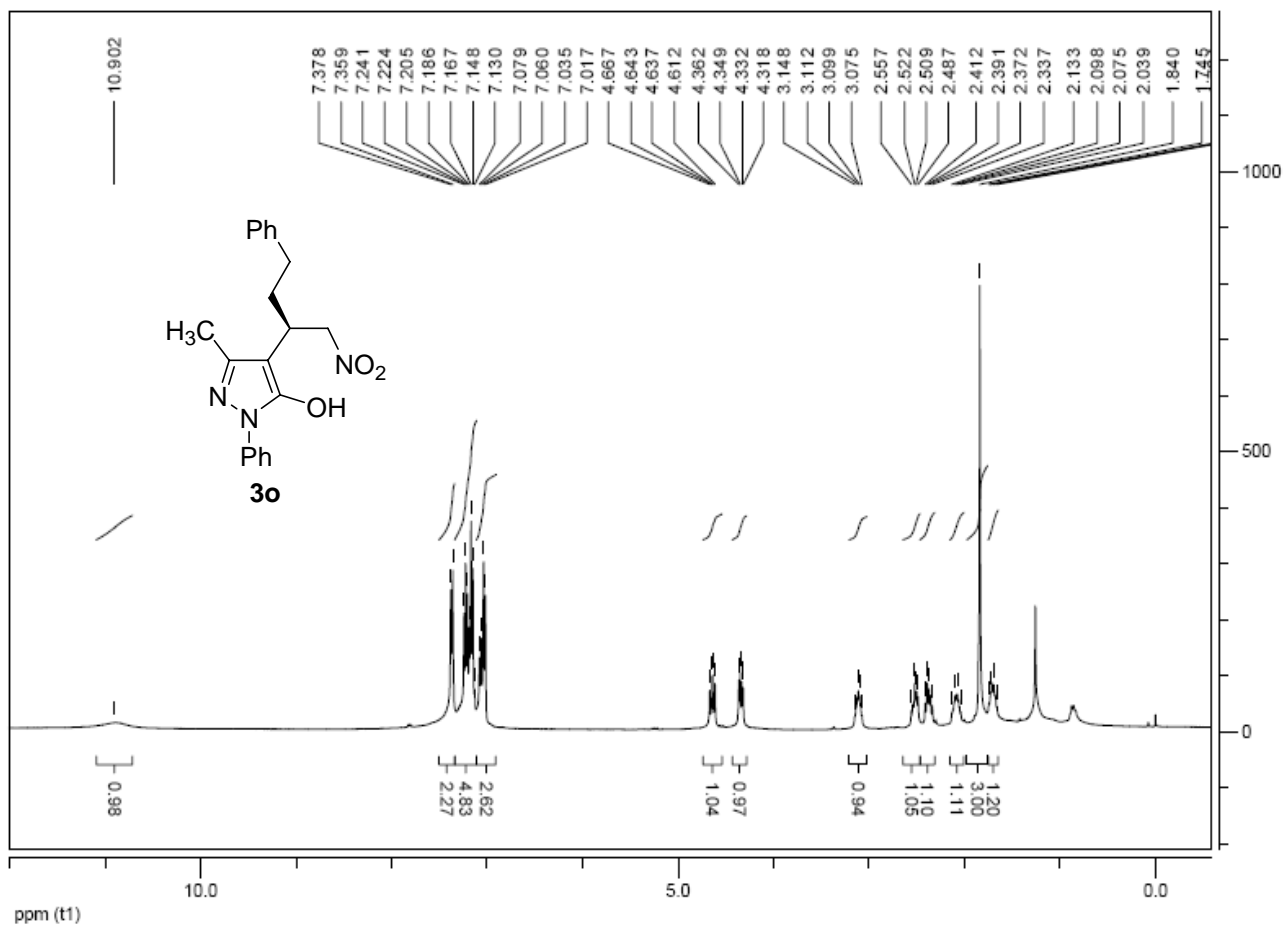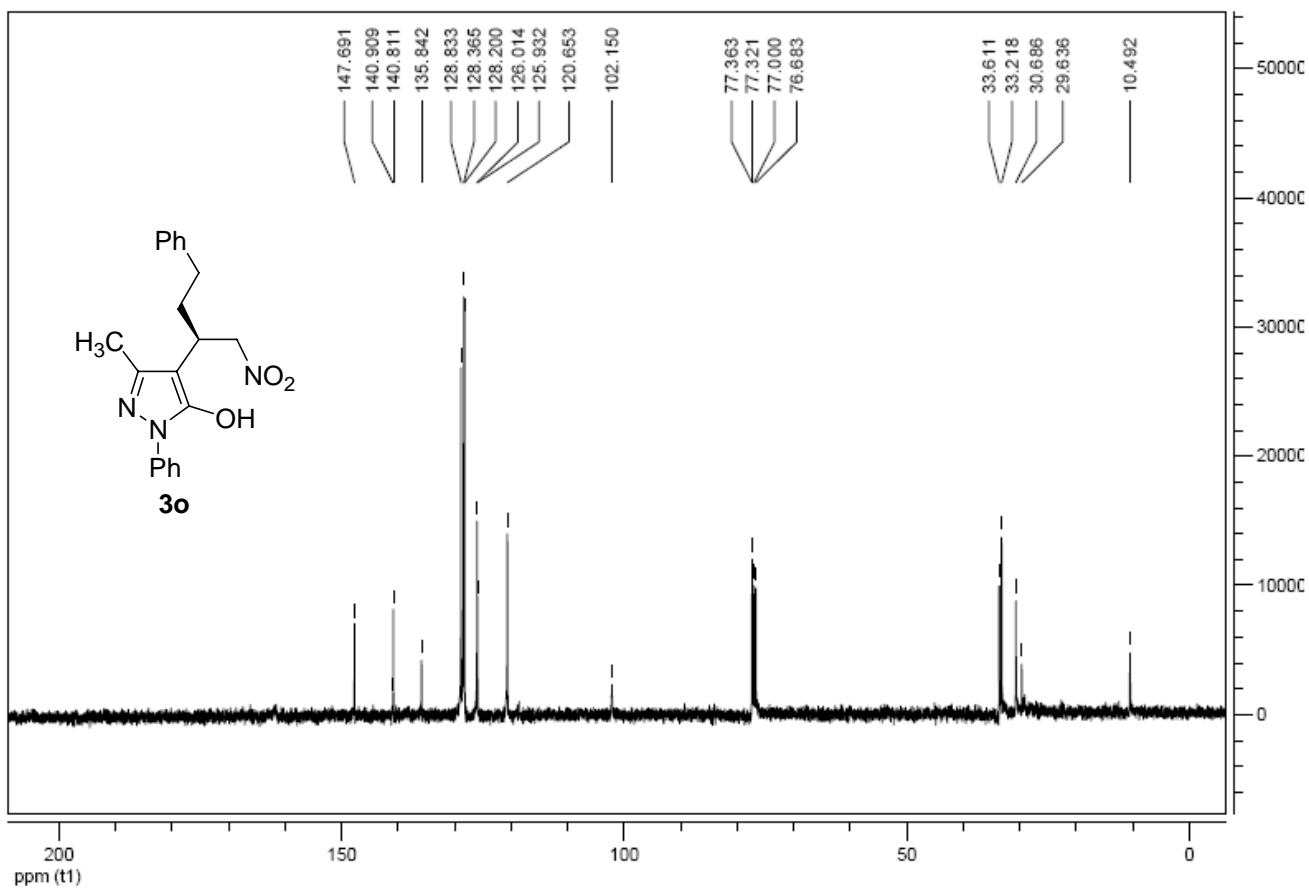



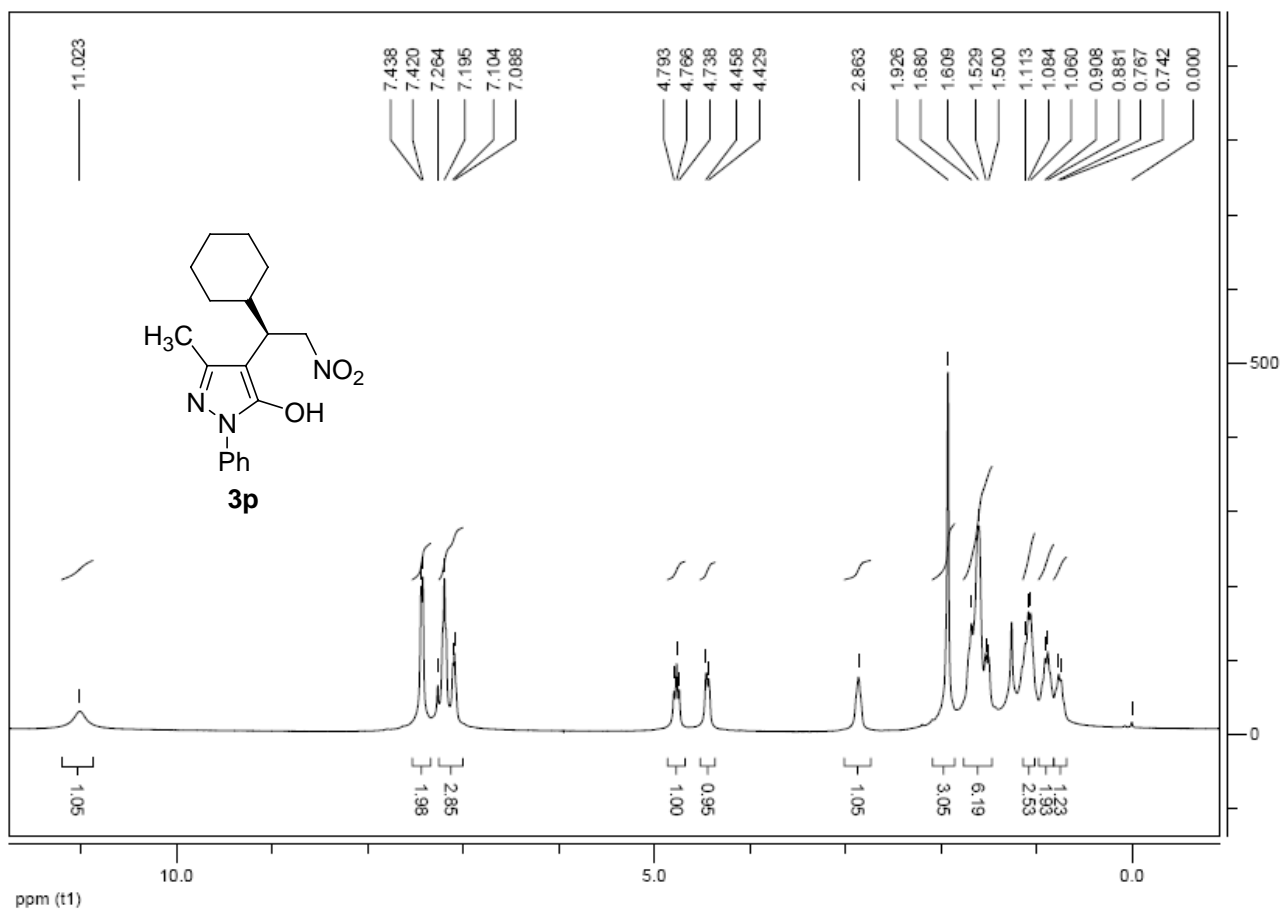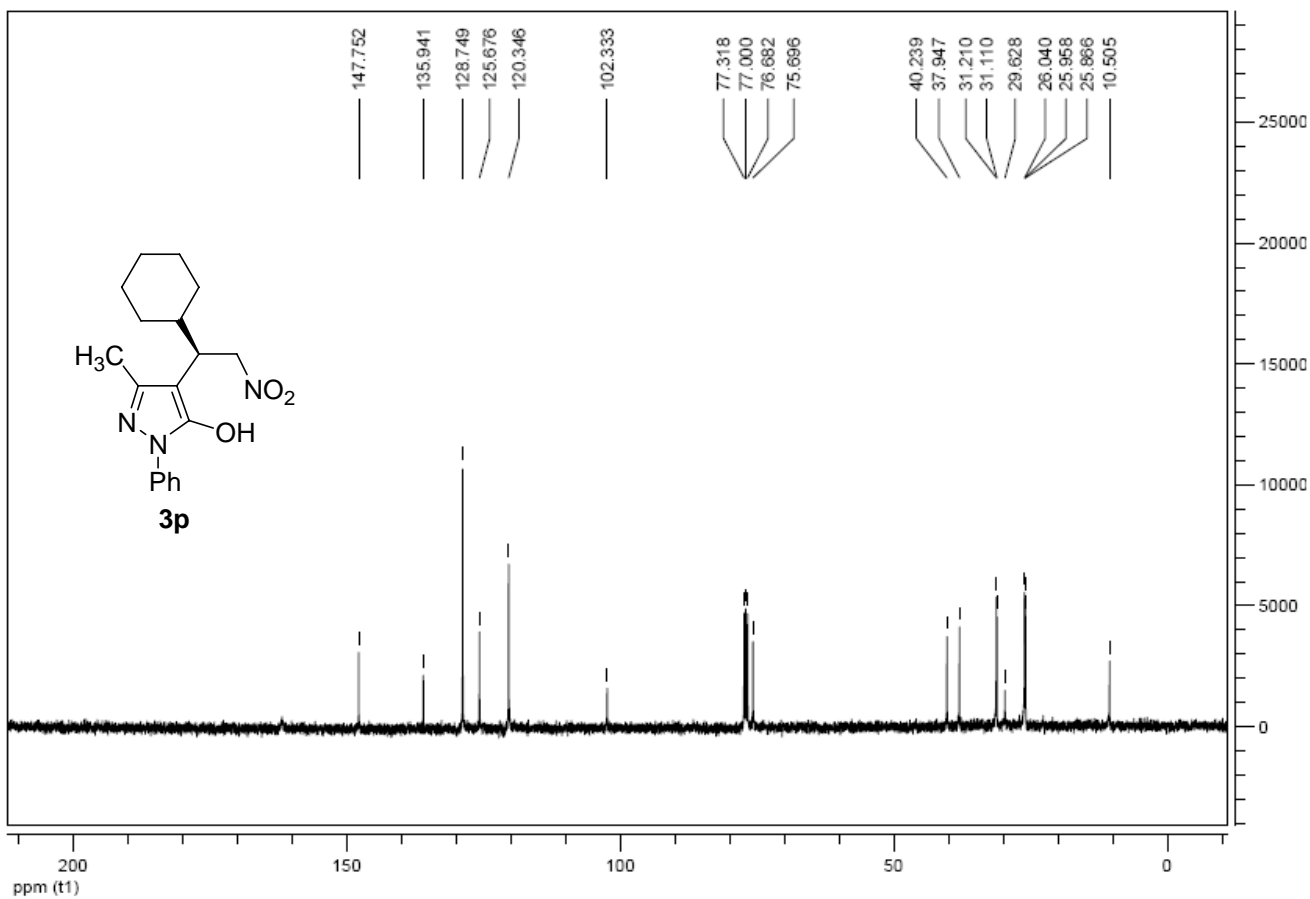

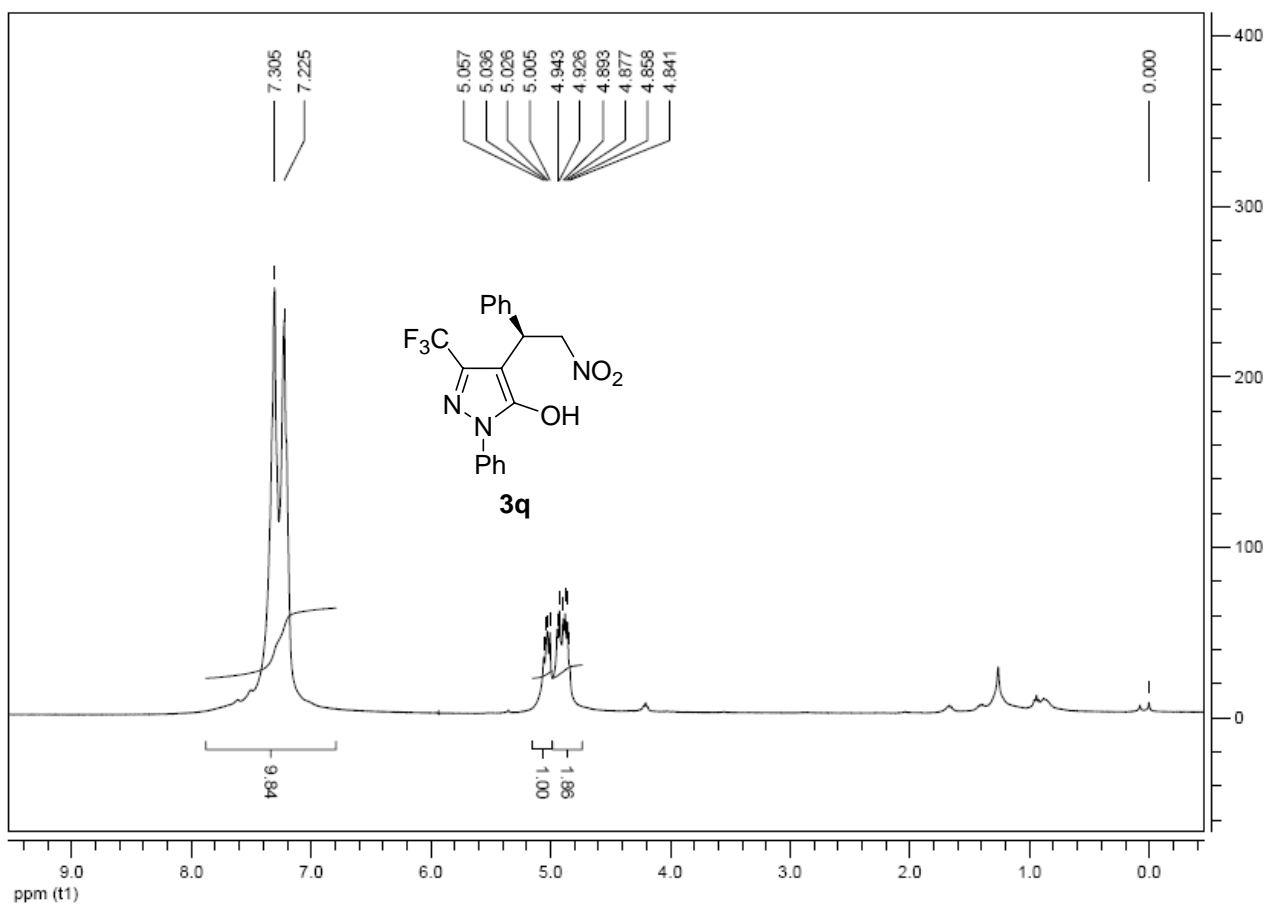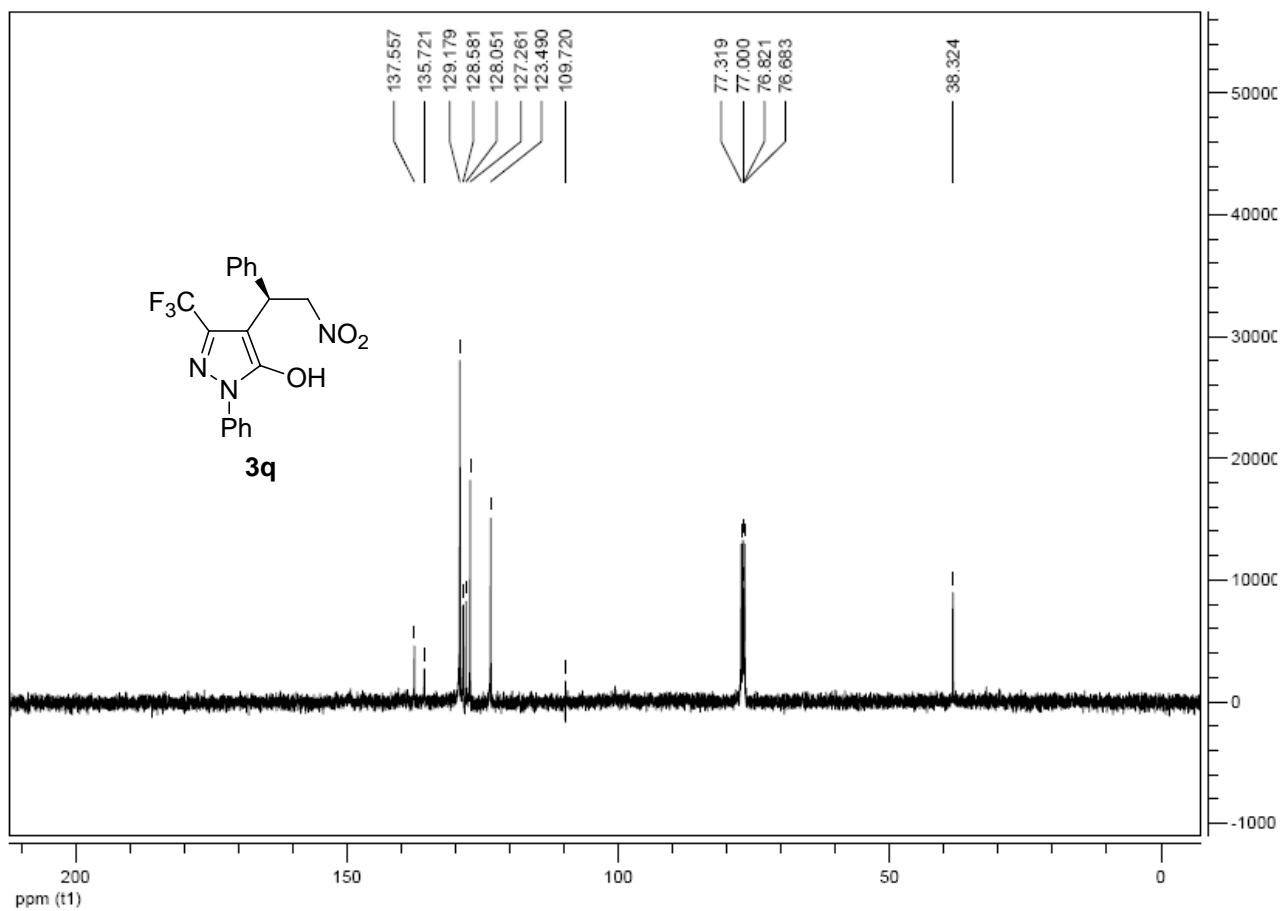

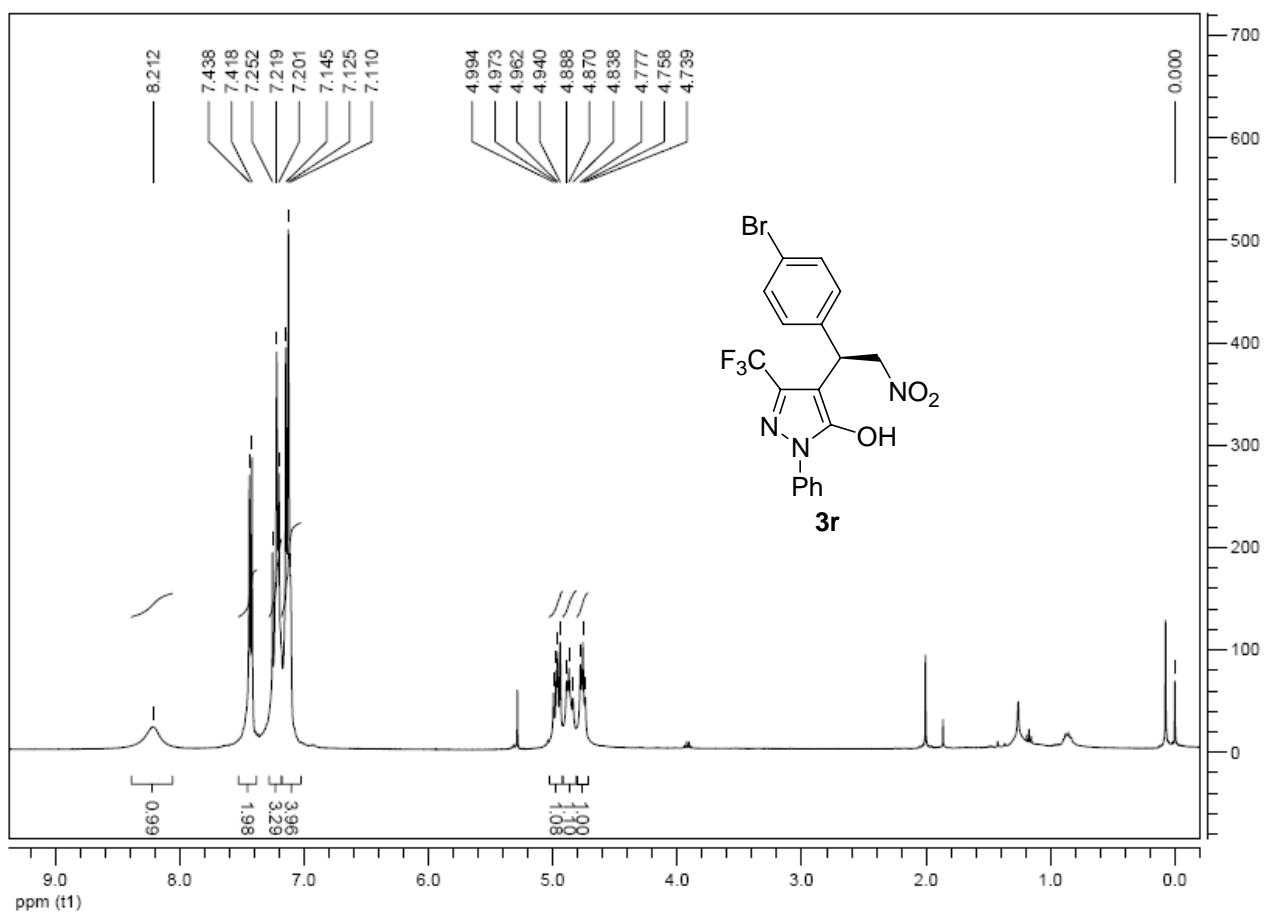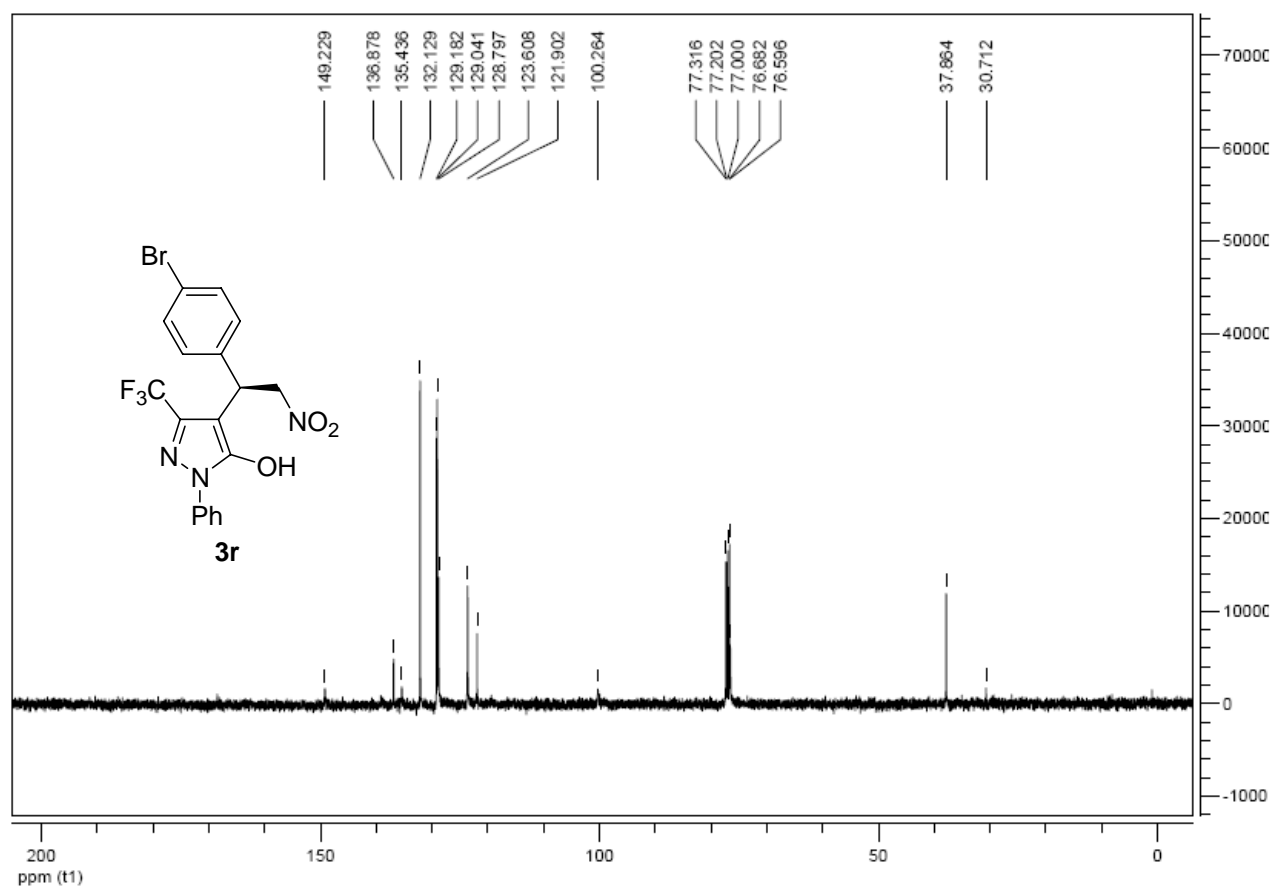

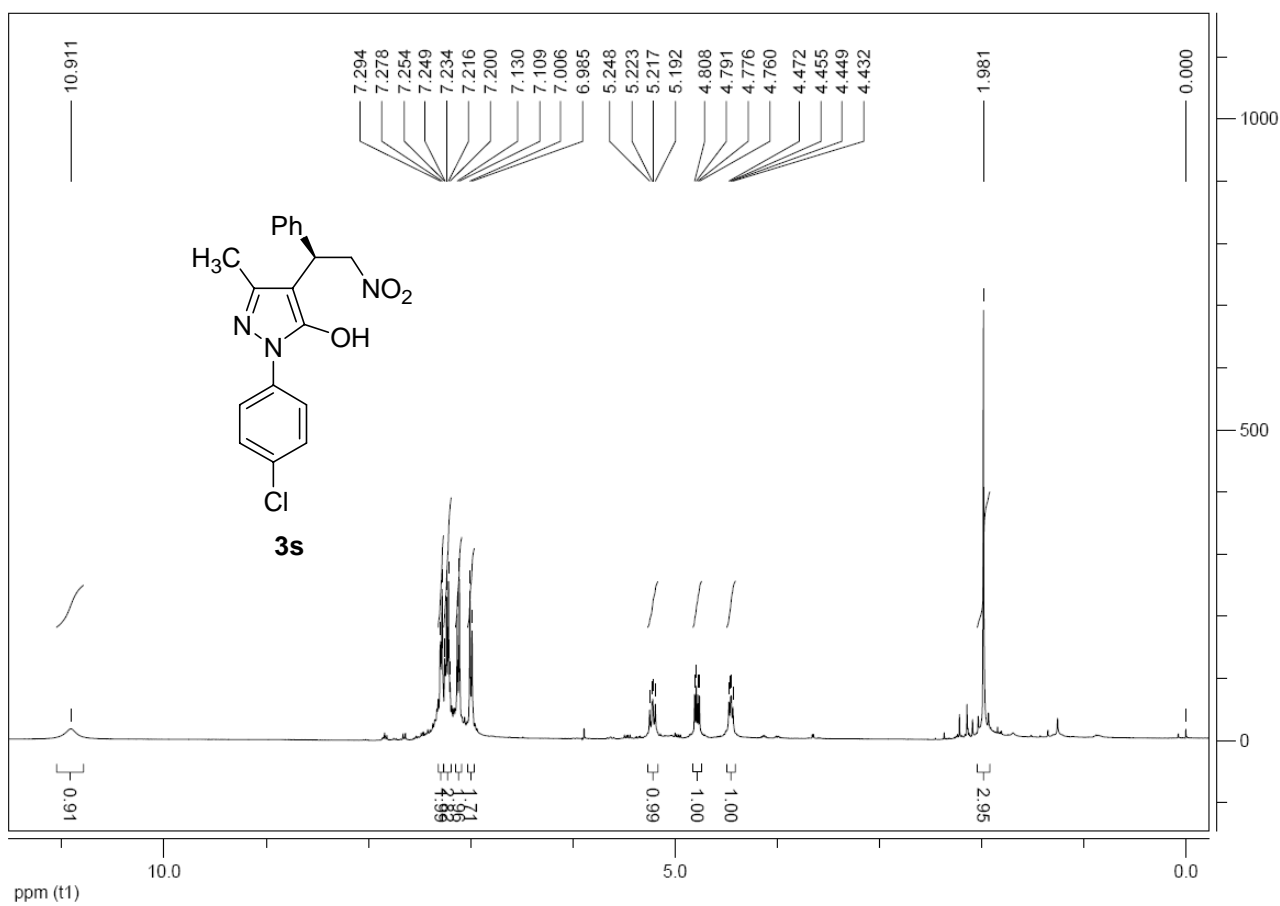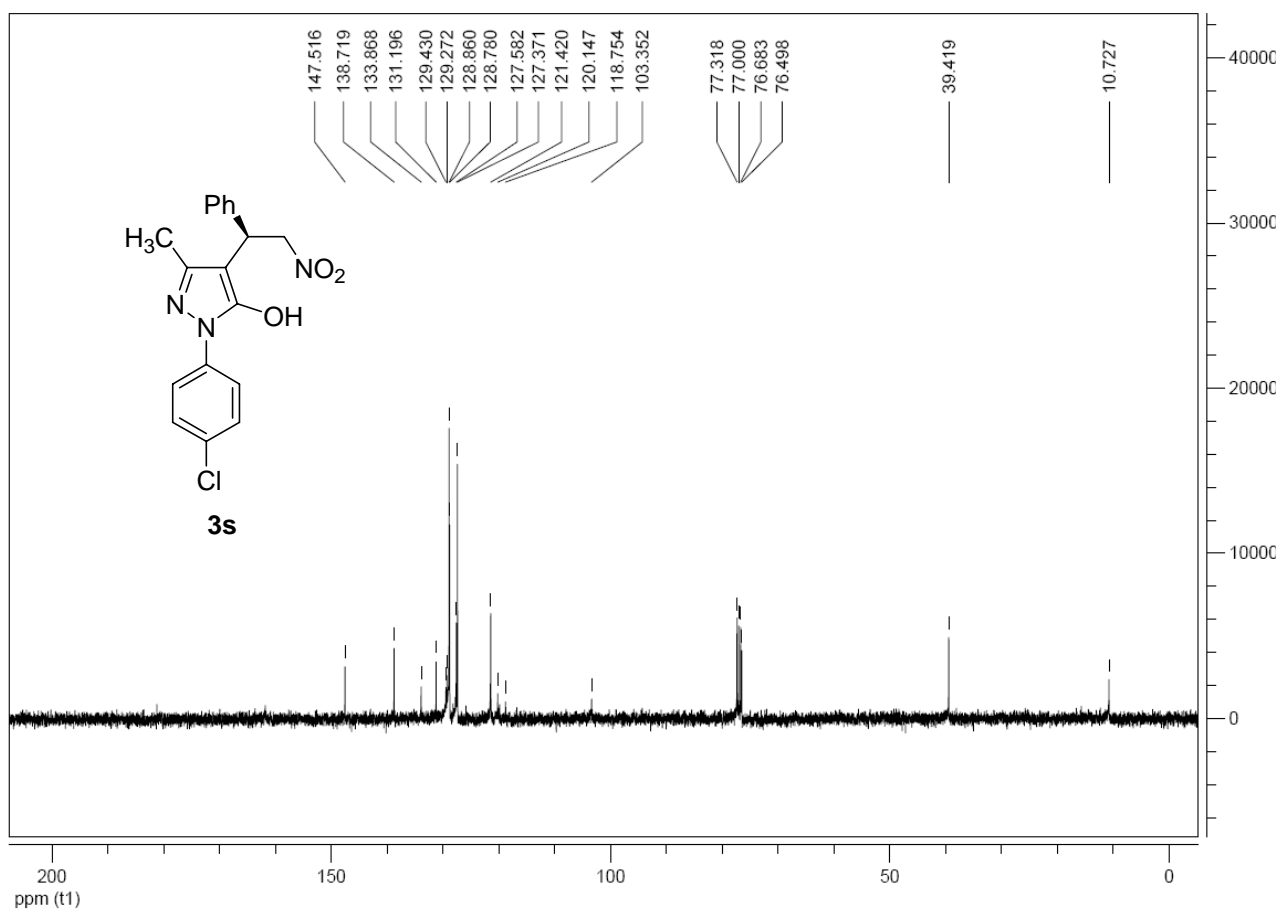

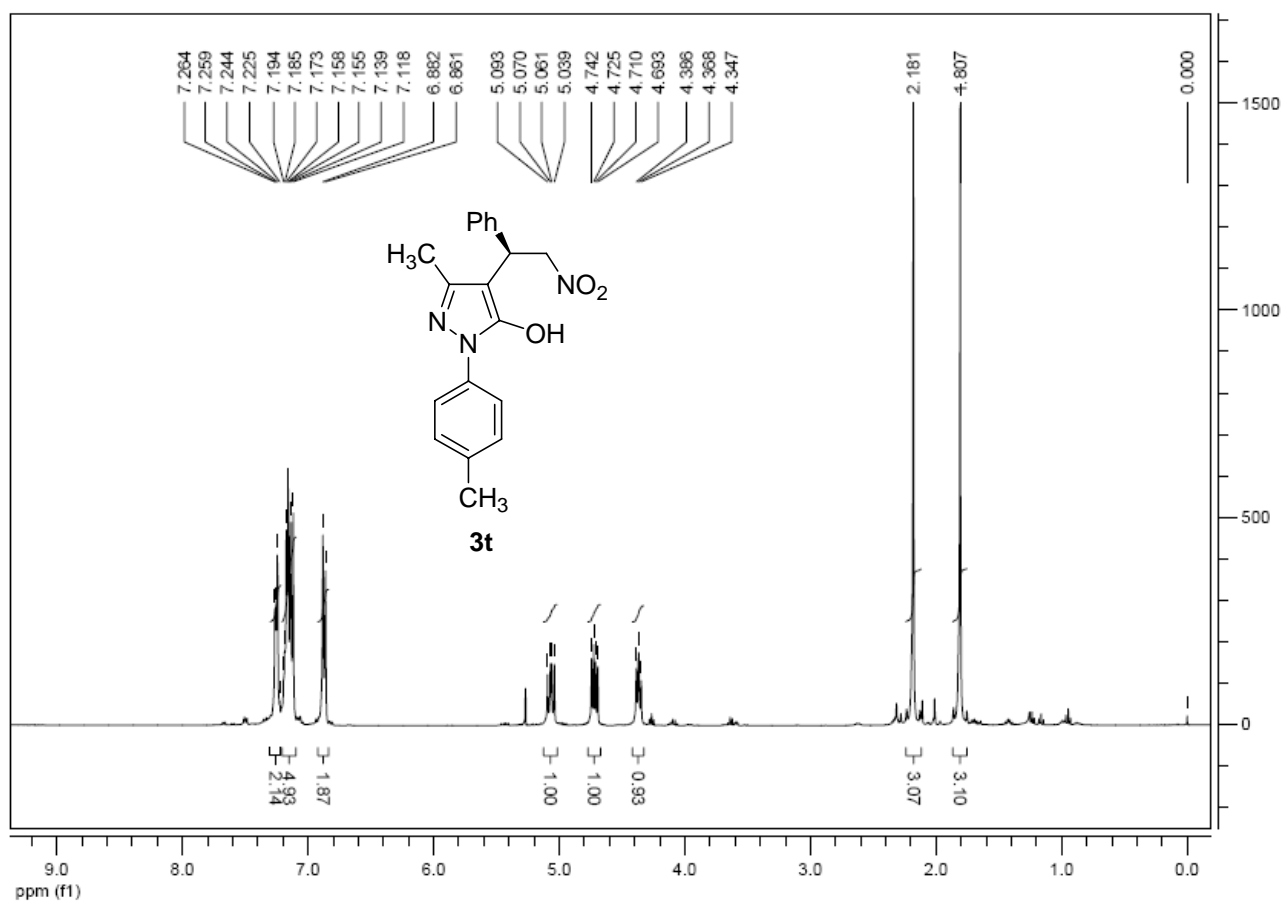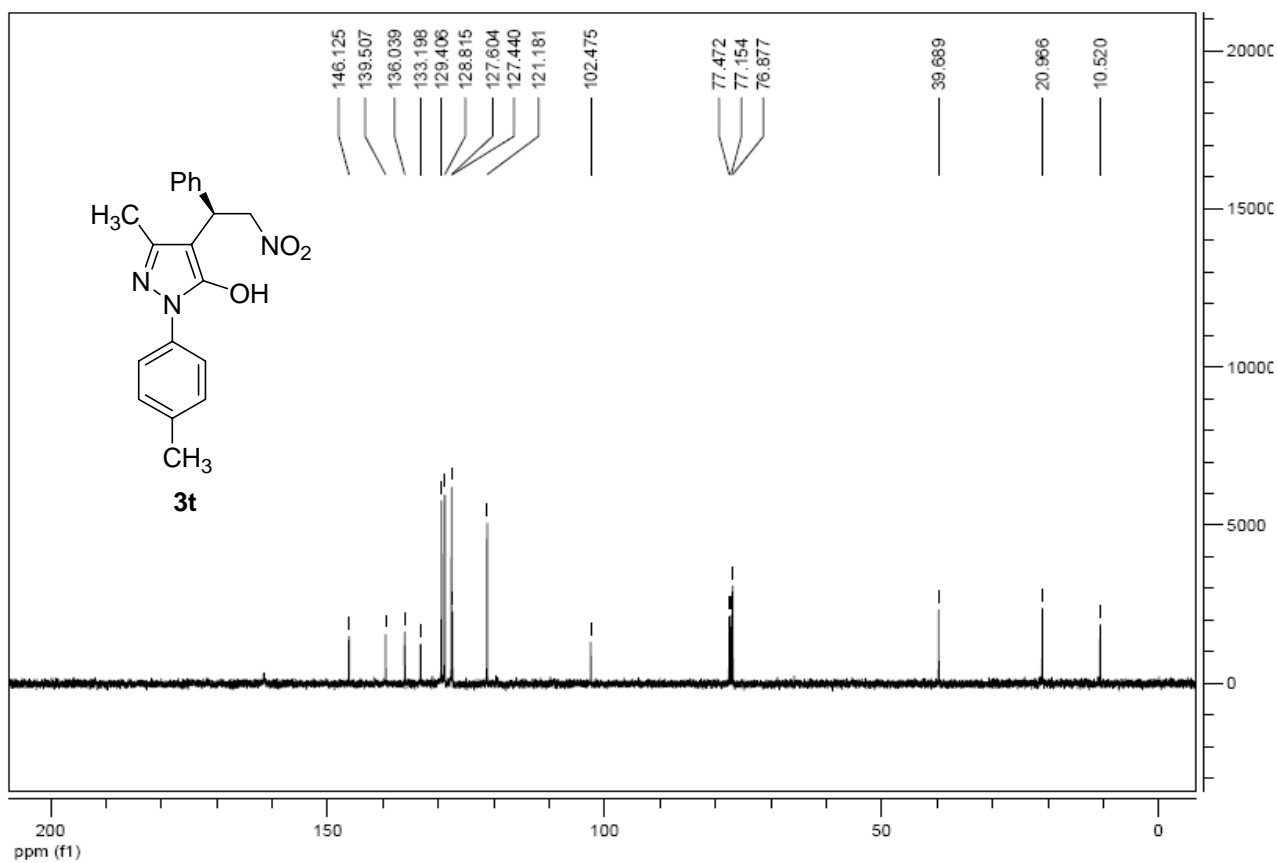

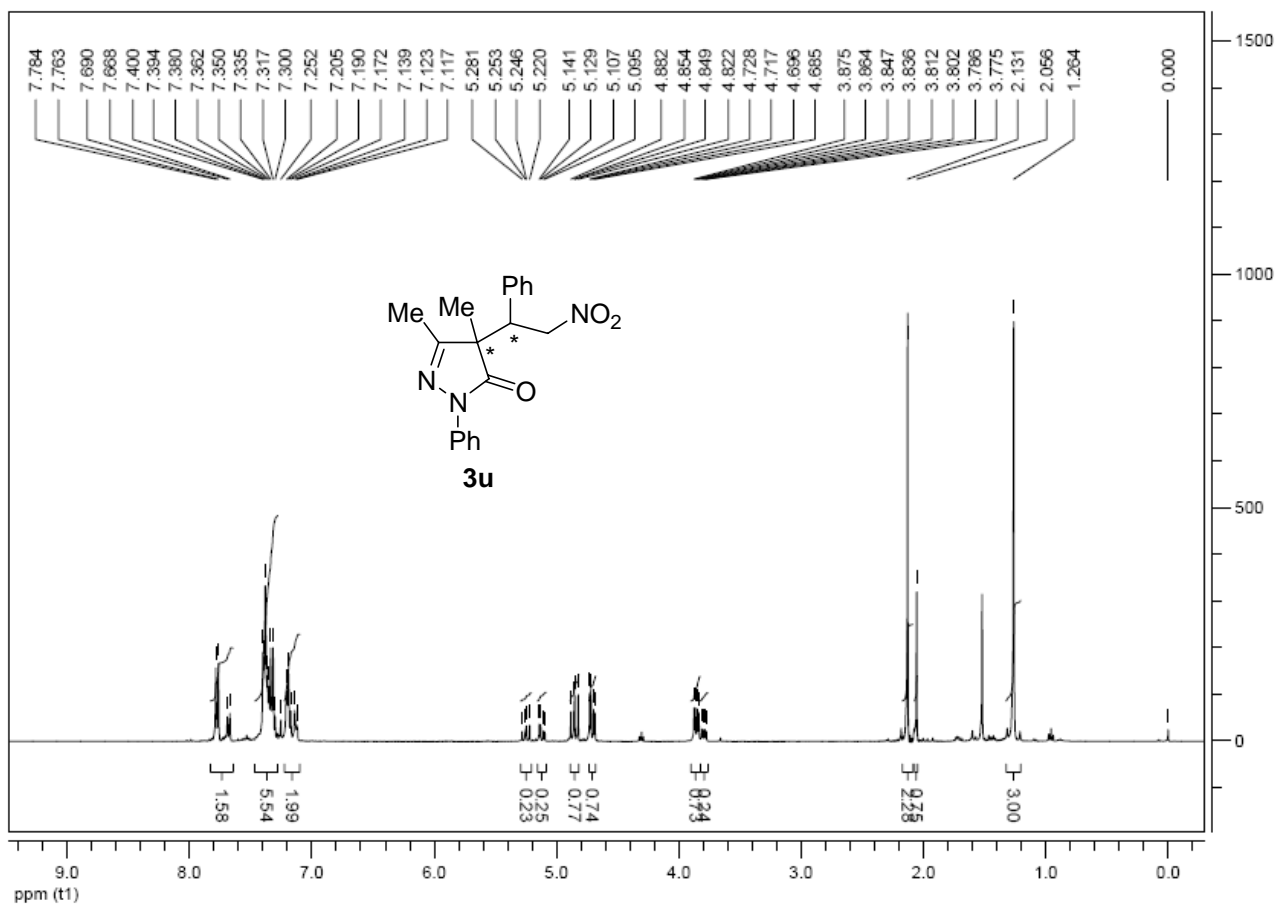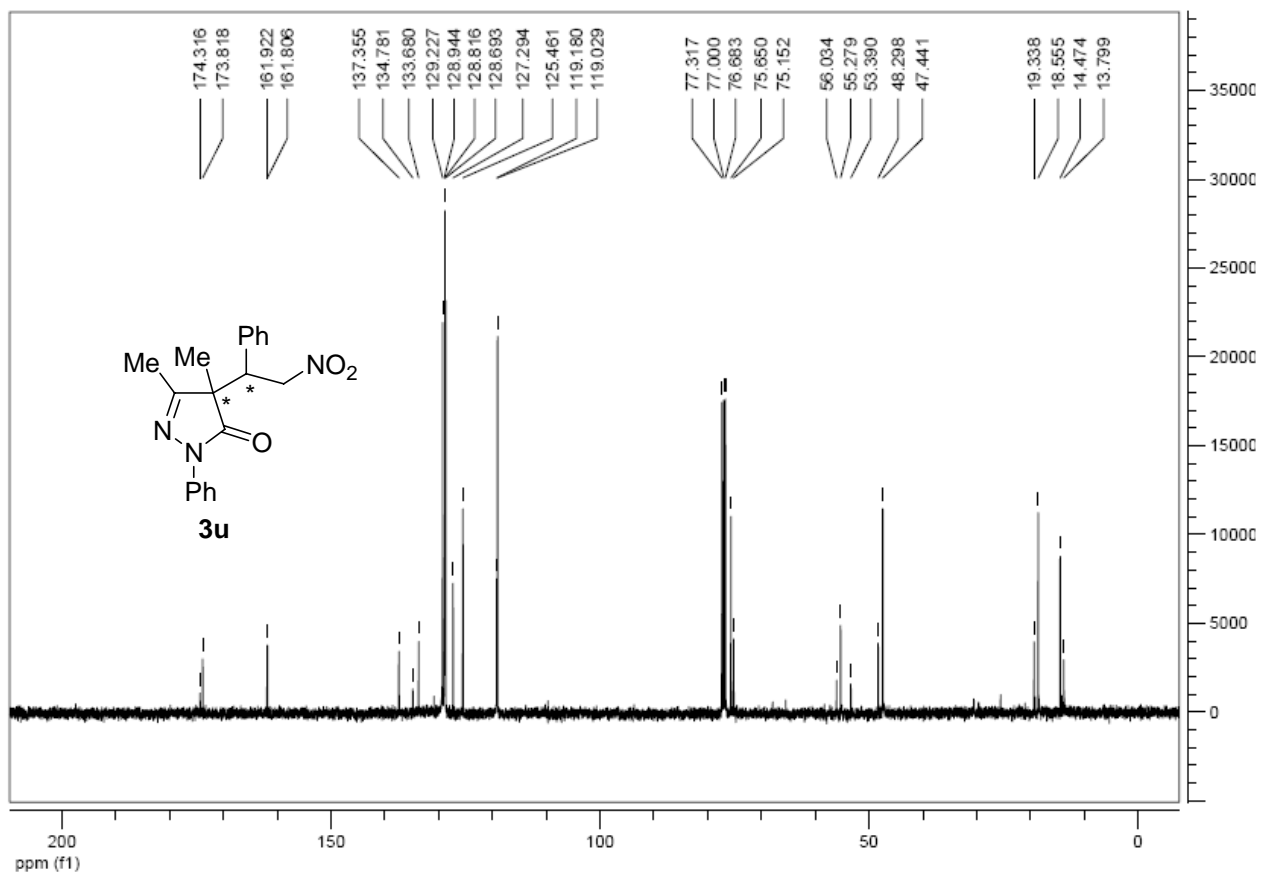

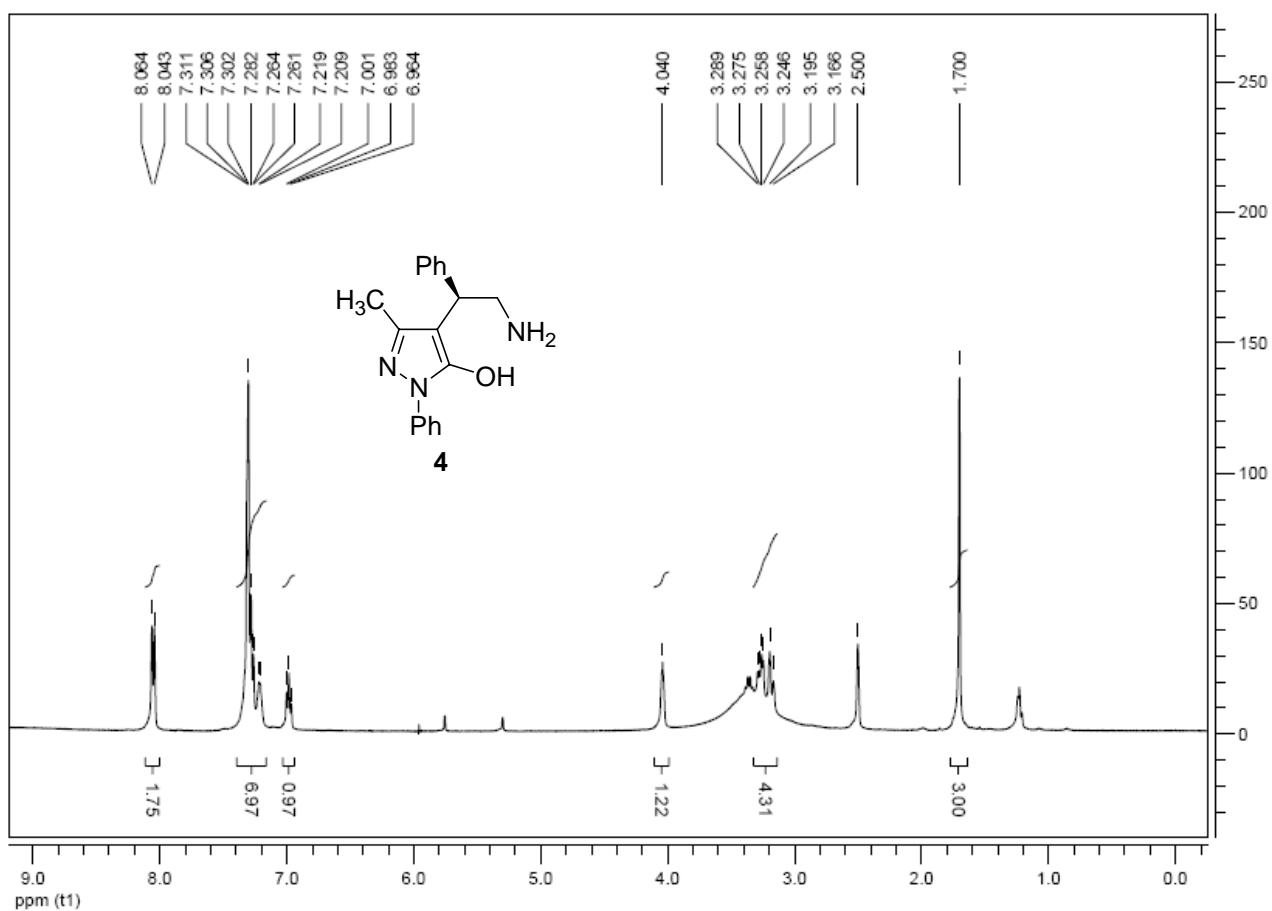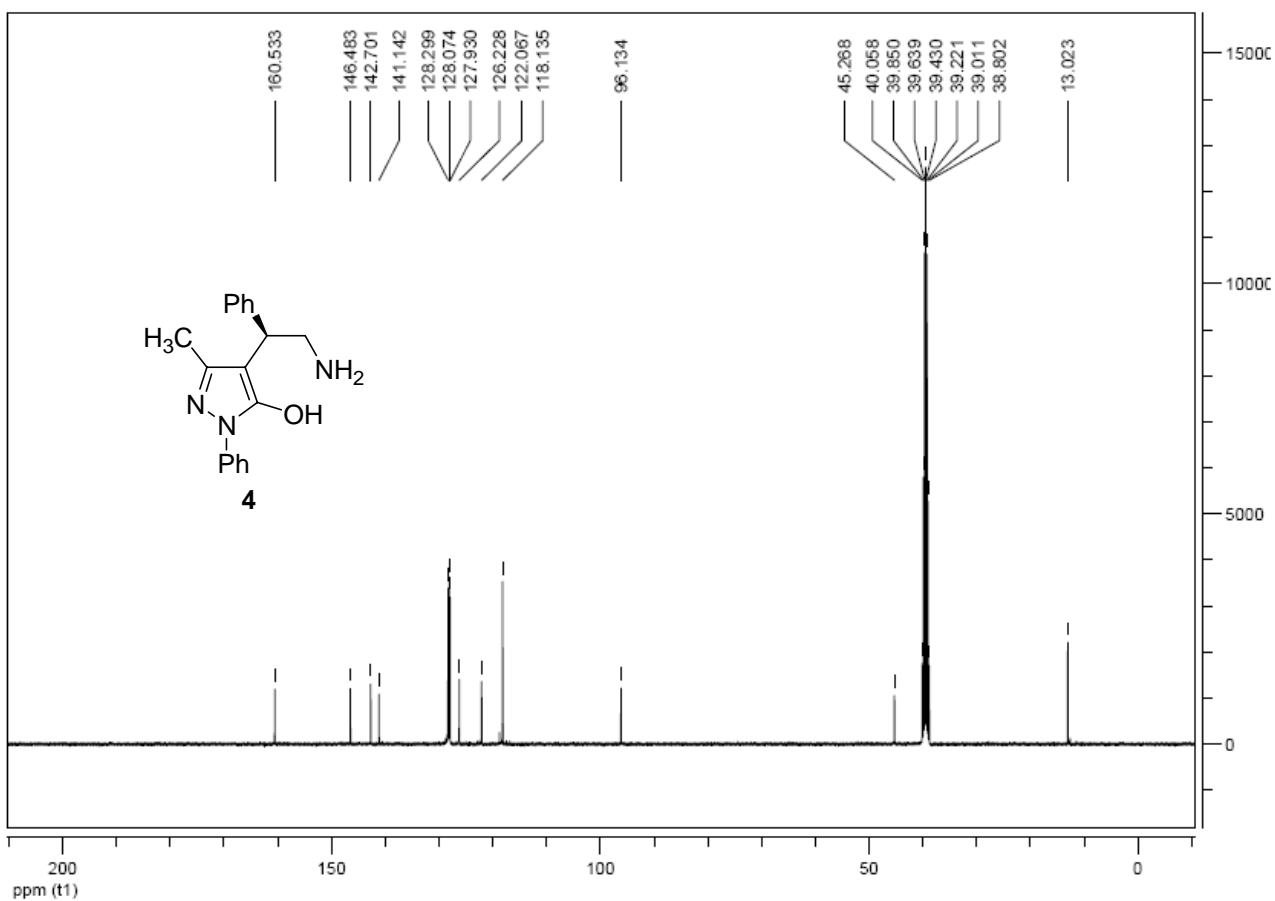

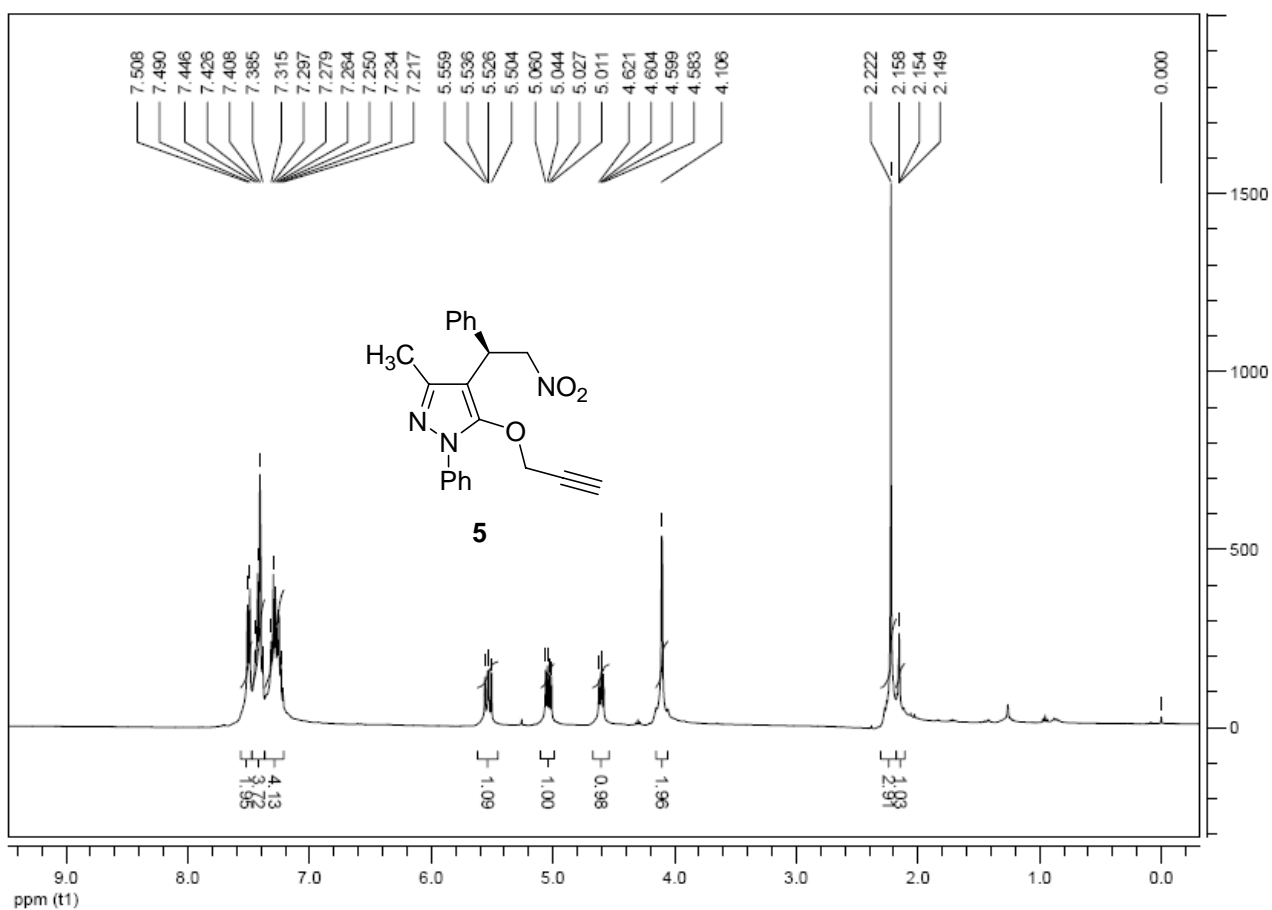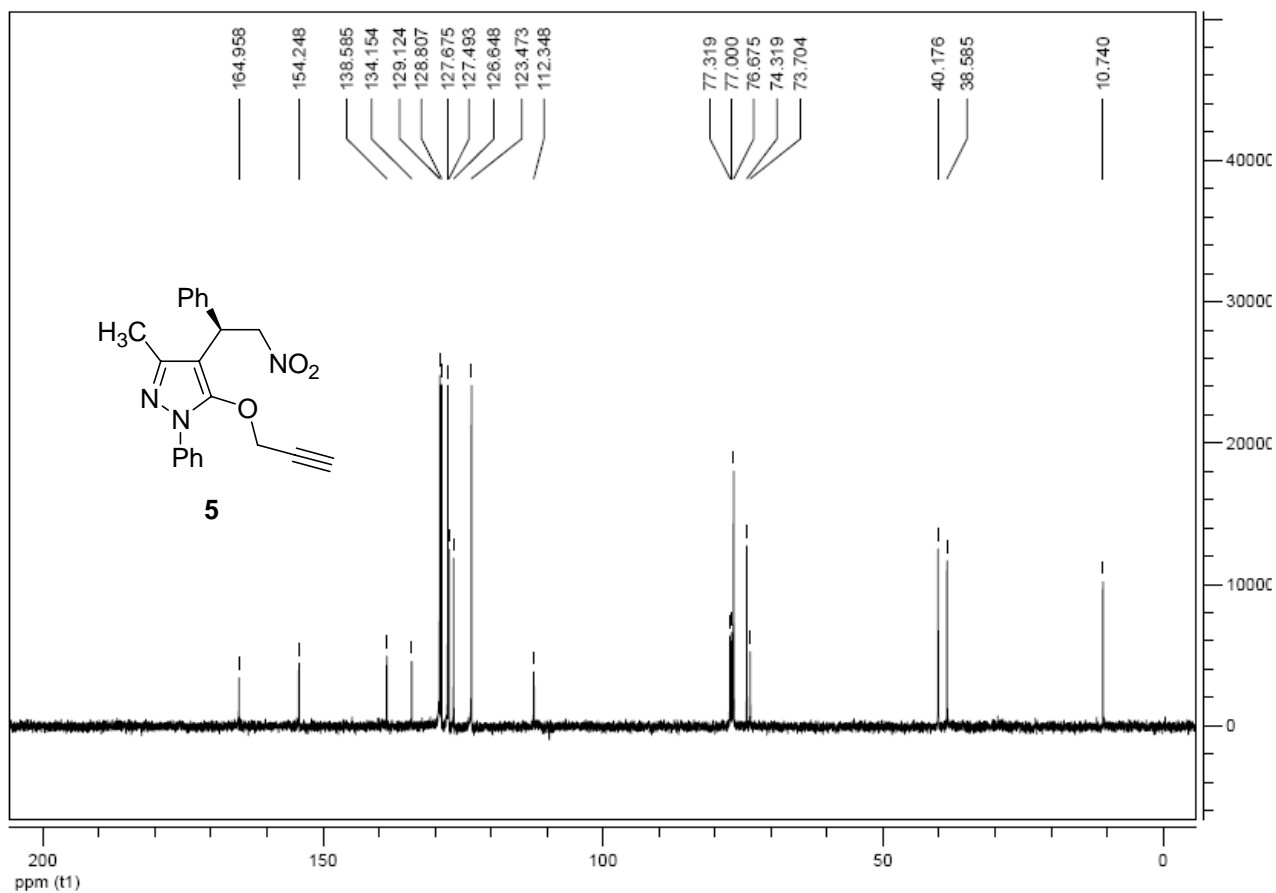



### Copies of HPLC chromatographs of products

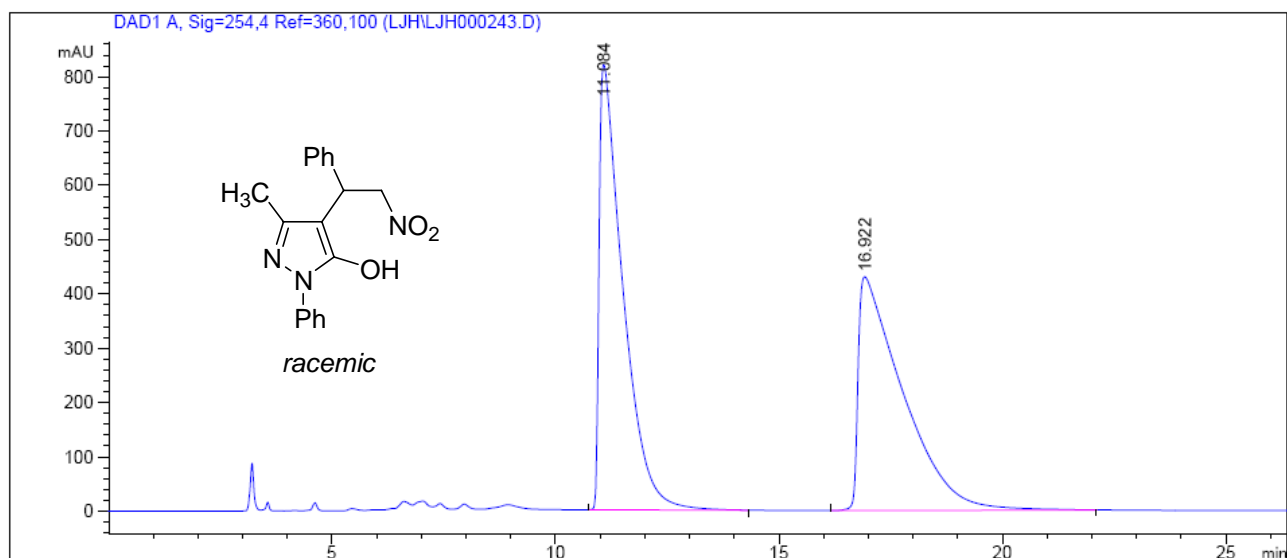

| Peak # | RetTime [min] | Type | Width [min] | Area [mAU*s] | Height [mAU] | Area %  |
|--------|---------------|------|-------------|--------------|--------------|---------|
| 1      | 11.084        | BB   | 0.5274      | 3.03263e4    | 820.21906    | 50.3276 |
| 2      | 16.922        | BB   | 0.9312      | 2.99315e4    | 430.49664    | 49.6724 |

### 3a (AD-H column; *n*-hexane–isopropanol 80:20)

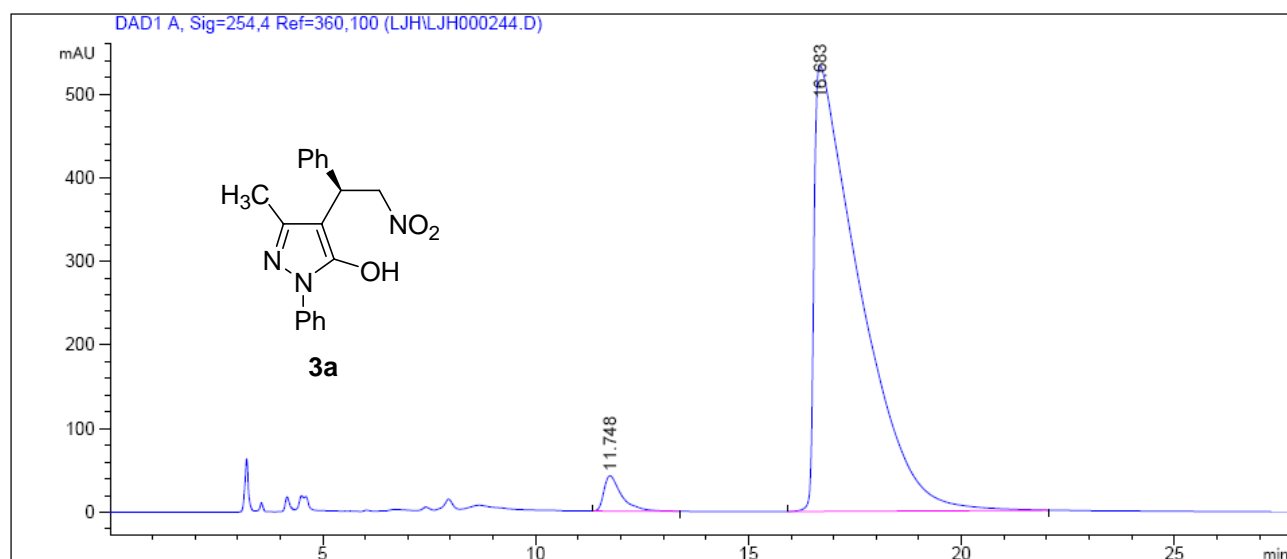

| Peak # | RetTime [min] | Type | Width [min] | Area [mAU*s] | Height [mAU] | Area %  |
|--------|---------------|------|-------------|--------------|--------------|---------|
| 1      | 11.748        | BB   | 0.4240      | 1218.40991   | 42.30479     | 2.9837  |
| 2      | 16.683        | BB   | 0.9953      | 3.96175e4    | 532.95099    | 97.0163 |

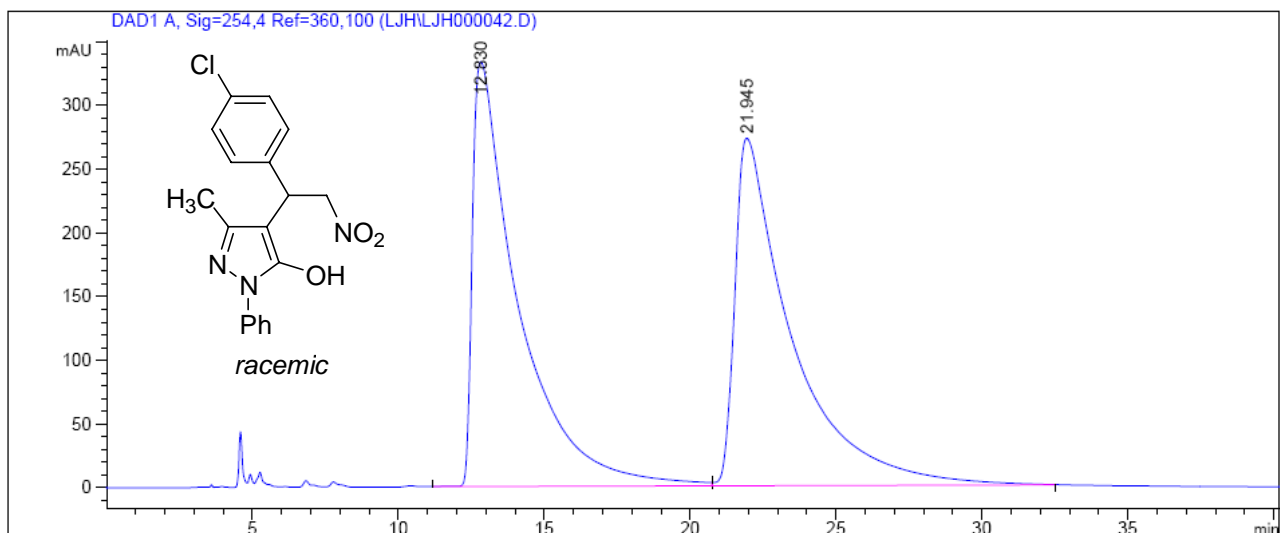

| Peak # | RetTime [min] | Type | Width [min] | Area [mAU*s] | Height [mAU] | Area %  |
|--------|---------------|------|-------------|--------------|--------------|---------|
| 1      | 12.830        | BV   | 1.4727      | 3.62605e4    | 333.43820    | 49.6103 |
| 2      | 21.945        | VB   | 1.7987      | 3.68301e4    | 272.86411    | 50.3897 |

**3b**

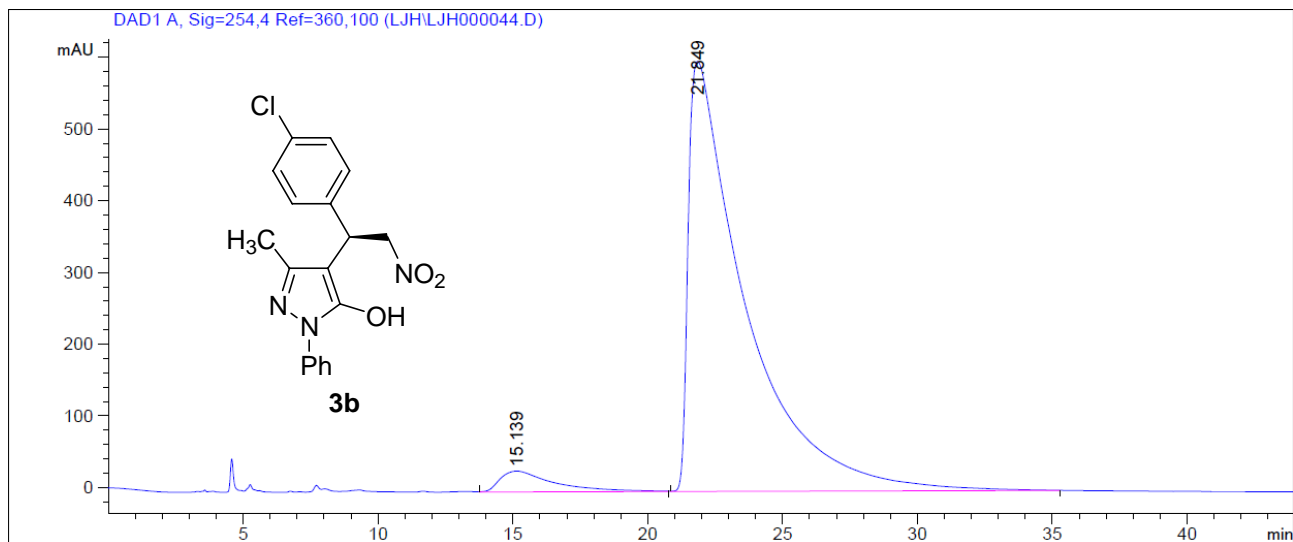

| Peak # | RetTime [min] | Type | Width [min] | Area [mAU*s] | Height [mAU] | Area %  |
|--------|---------------|------|-------------|--------------|--------------|---------|
| 1      | 15.139        | VB   | 1.9751      | 4043.31177   | 29.06359     | 4.3844  |
| 2      | 21.849        | BB   | 1.9468      | 8.81767e4    | 599.89722    | 95.6156 |

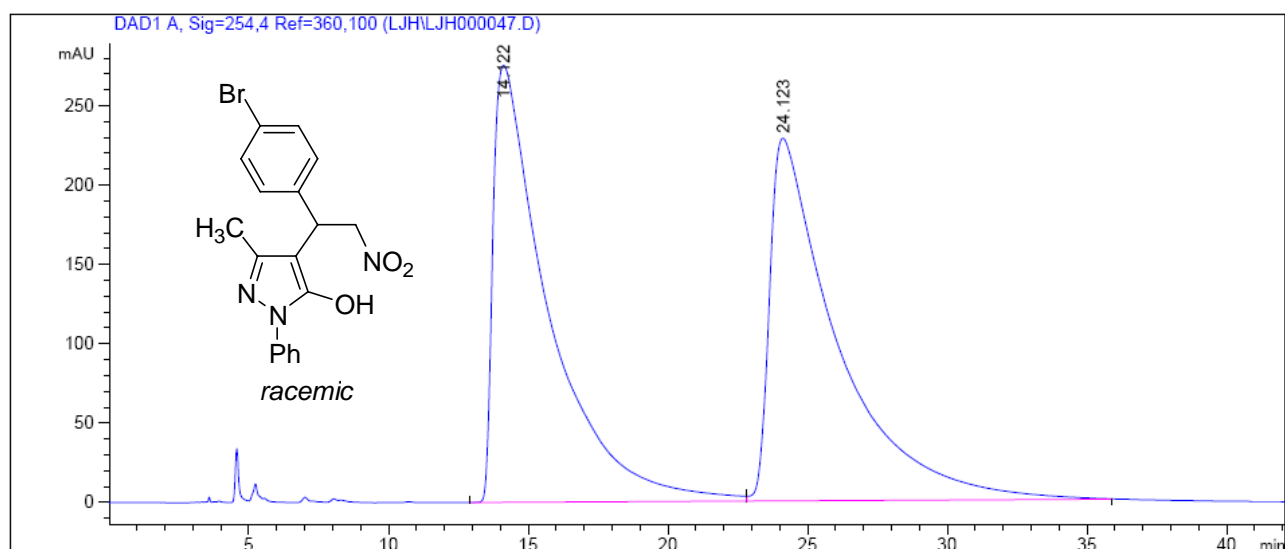

| Peak # | RetTime [min] | Type | Width [min] | Area [mAU*s] | Height [mAU] | Area %  |
|--------|---------------|------|-------------|--------------|--------------|---------|
| 1      | 14.122        | BV   | 1.8405      | 3.78582e4    | 275.26993    | 49.6375 |
| 2      | 24.123        | VB   | 2.2611      | 3.84111e4    | 228.50797    | 50.3625 |

**3c**

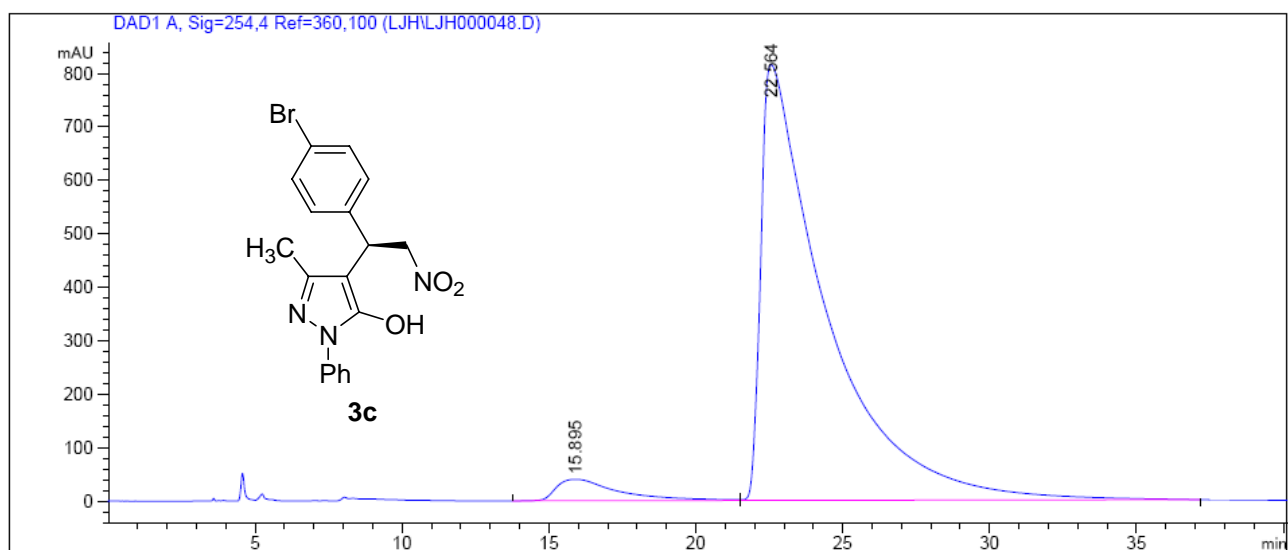

| Peak # | RetTime [min] | Type | Width [min] | Area [mAU*s] | Height [mAU] | Area %  |
|--------|---------------|------|-------------|--------------|--------------|---------|
| 1      | 15.895        | BV   | 2.1305      | 5866.79541   | 39.92146     | 4.4472  |
| 2      | 22.564        | VB   | 2.0599      | 1.26054e5    | 815.23413    | 95.5528 |

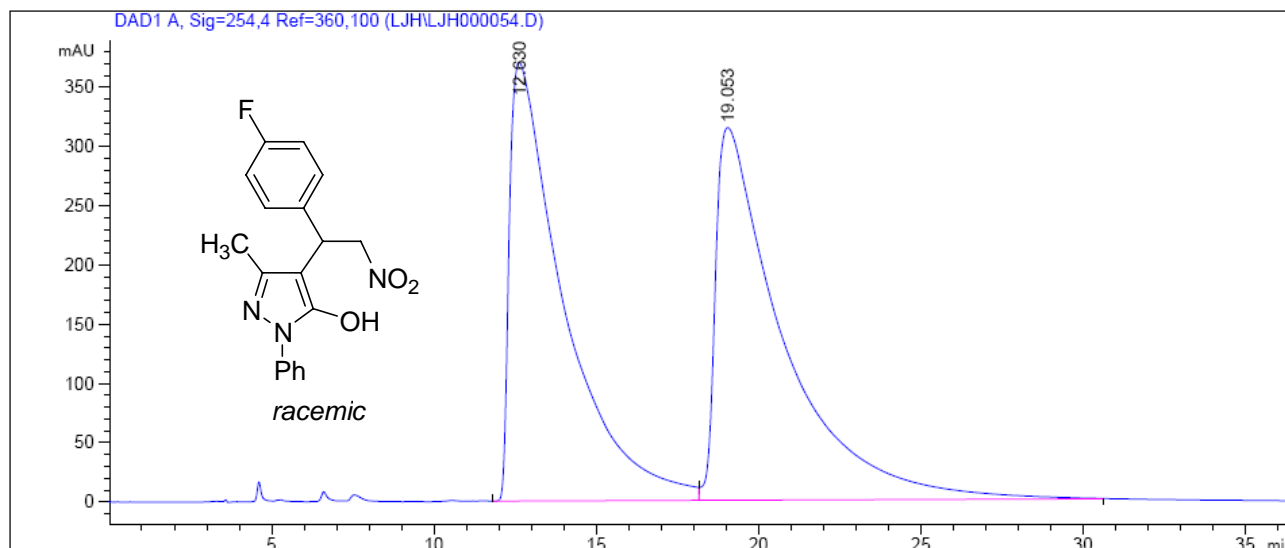

| Peak # | RetTime [min] | Type | Width [min] | Area [mAU*s] | Height [mAU] | Area %  |
|--------|---------------|------|-------------|--------------|--------------|---------|
| 1      | 12.630        | BV   | 1.6386      | 4.27100e4    | 370.03592    | 48.4494 |
| 2      | 19.053        | VB   | 1.9621      | 4.54438e4    | 314.43442    | 51.5506 |

**3d**

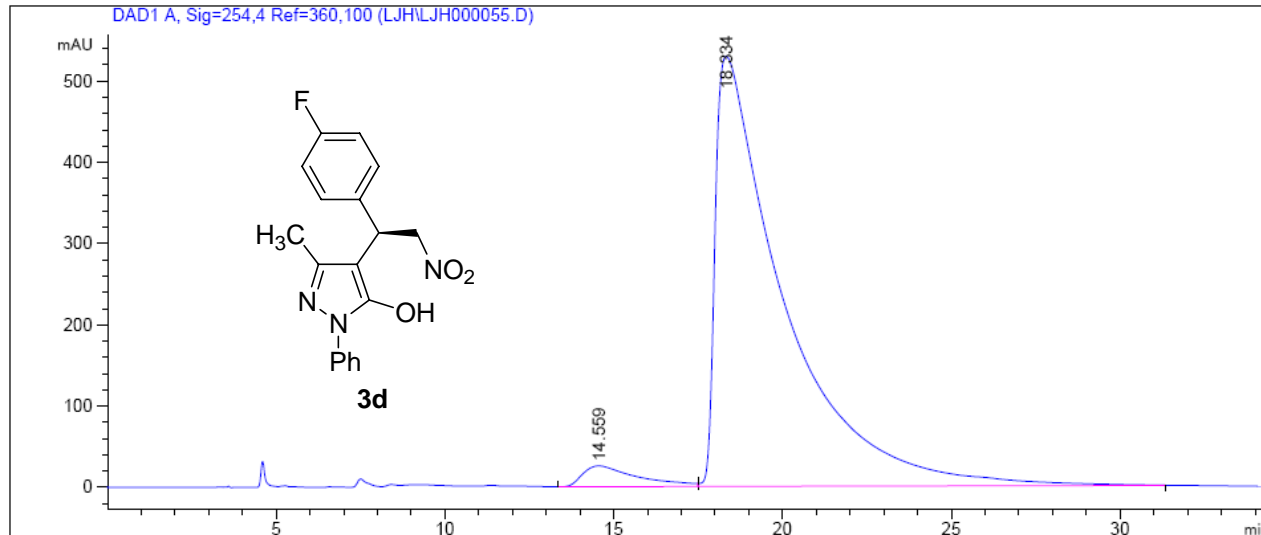

| Peak # | RetTime [min] | Type | Width [min] | Area [mAU*s] | Height [mAU] | Area %  |
|--------|---------------|------|-------------|--------------|--------------|---------|
| 1      | 14.559        | BV   | 1.5711      | 2884.92065   | 25.67027     | 3.7297  |
| 2      | 18.334        | VB   | 1.8652      | 7.44643e4    | 529.35083    | 96.2703 |

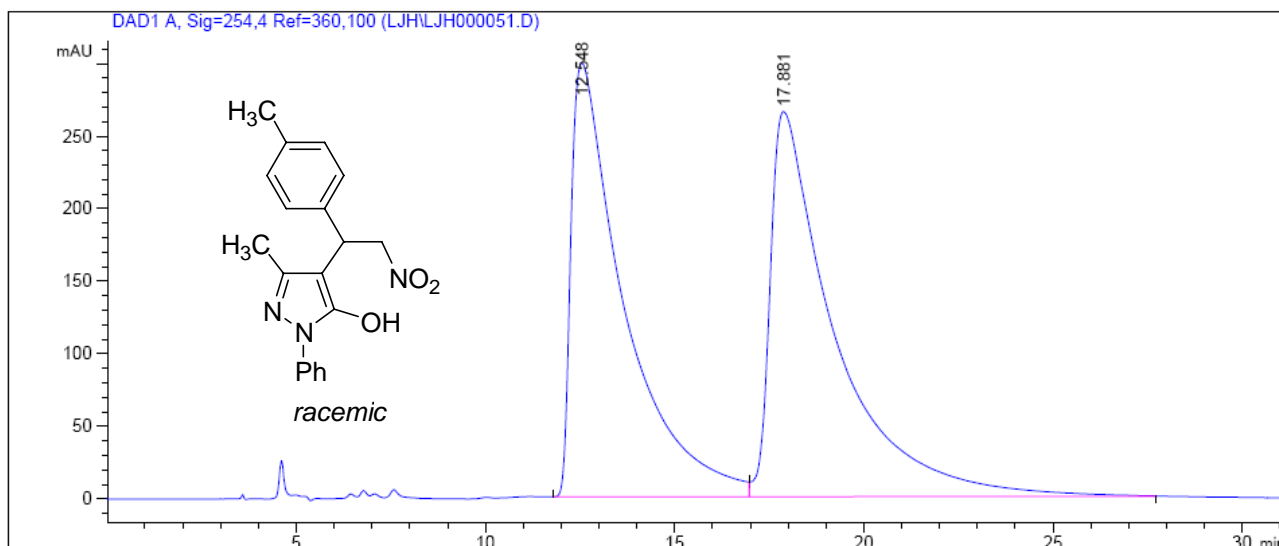

| Peak # | RetTime [min] | Type | Width [min] | Area [mAU*s] | Height [mAU] | Area %  |
|--------|---------------|------|-------------|--------------|--------------|---------|
| 1      | 12.548        | BV   | 1.3548      | 2.88856e4    | 299.07877    | 48.0104 |
| 2      | 17.881        | VB   | 1.5828      | 3.12797e4    | 265.43570    | 51.9896 |

3e

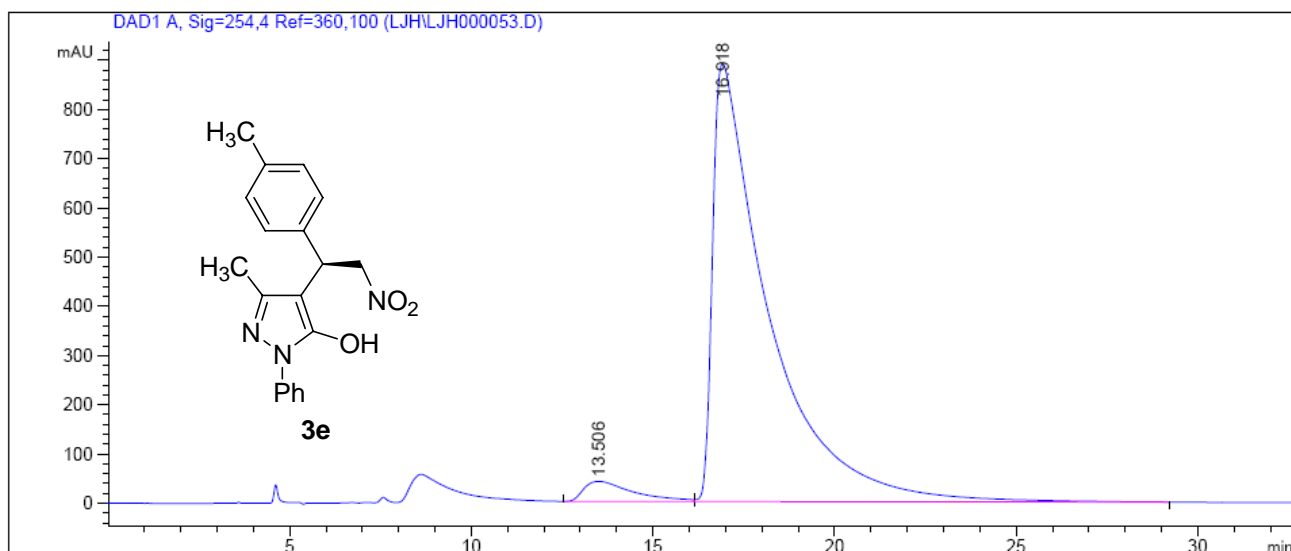

| Peak # | RetTime [min] | Type | Width [min] | Area [mAU*s] | Height [mAU] | Area %  |
|--------|---------------|------|-------------|--------------|--------------|---------|
| 1      | 13.506        | BV   | 1.4053      | 3877.27246   | 40.77872     | 3.9114  |
| 2      | 16.918        | VB   | 1.4653      | 9.52504e4    | 889.53589    | 96.0886 |

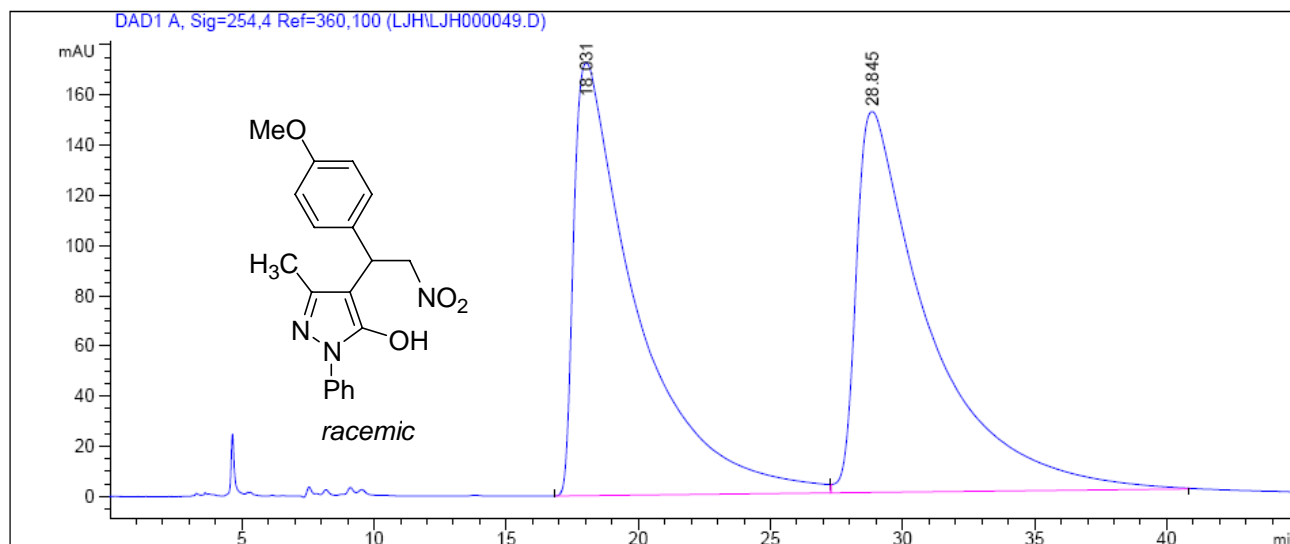

| Peak # | RetTime [min] | Type | Width [min] | Area [mAU*s] | Height [mAU] | Area %  |
|--------|---------------|------|-------------|--------------|--------------|---------|
| 1      | 18.031        | BB   | 2.2280      | 2.84851e4    | 172.37280    | 49.4499 |
| 2      | 28.845        | BB   | 2.5509      | 2.91188e4    | 151.73271    | 50.5501 |

3f

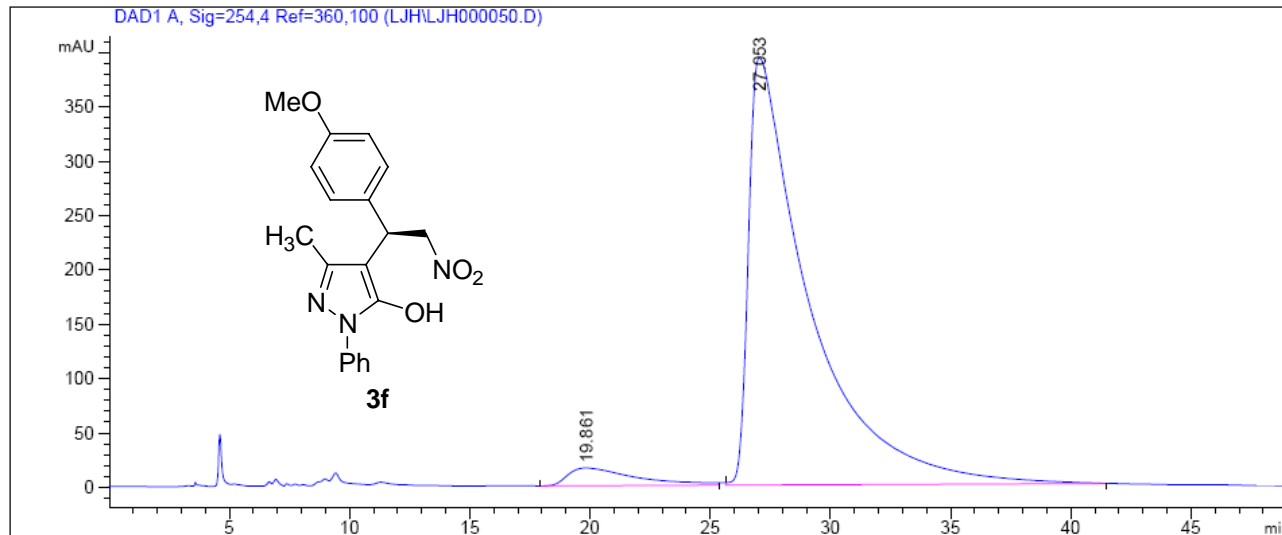

| Peak # | RetTime [min] | Type | Width [min] | Area [mAU*s] | Height [mAU] | Area %  |
|--------|---------------|------|-------------|--------------|--------------|---------|
| 1      | 19.861        | BB   | 2.3467      | 3171.79907   | 16.29616     | 4.4051  |
| 2      | 27.053        | BB   | 2.2999      | 6.88317e4    | 392.88565    | 95.5949 |

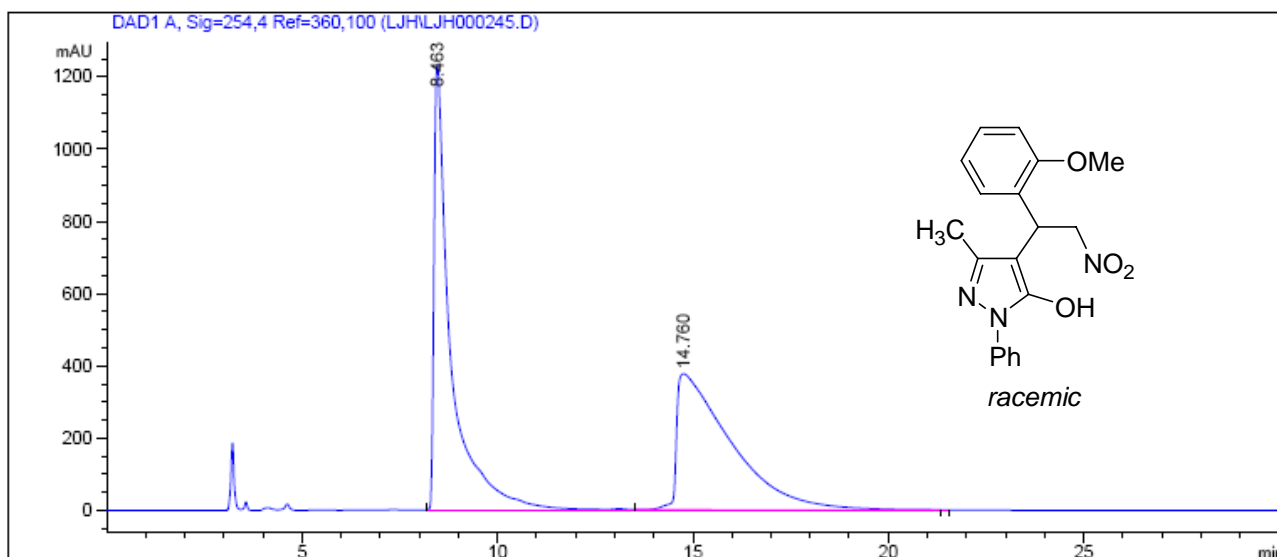

| Peak # | RetTime [min] | Type | Width [min] | Area [mAU*s] | Height [mAU] | Area %  |
|--------|---------------|------|-------------|--------------|--------------|---------|
| 1      | 8.463         | BB S | 0.4119      | 3.72223e4    | 1232.79810   | 50.5799 |
| 2      | 14.760        | VB X | 1.2442      | 3.63688e4    | 376.10168    | 49.4201 |

**3g**

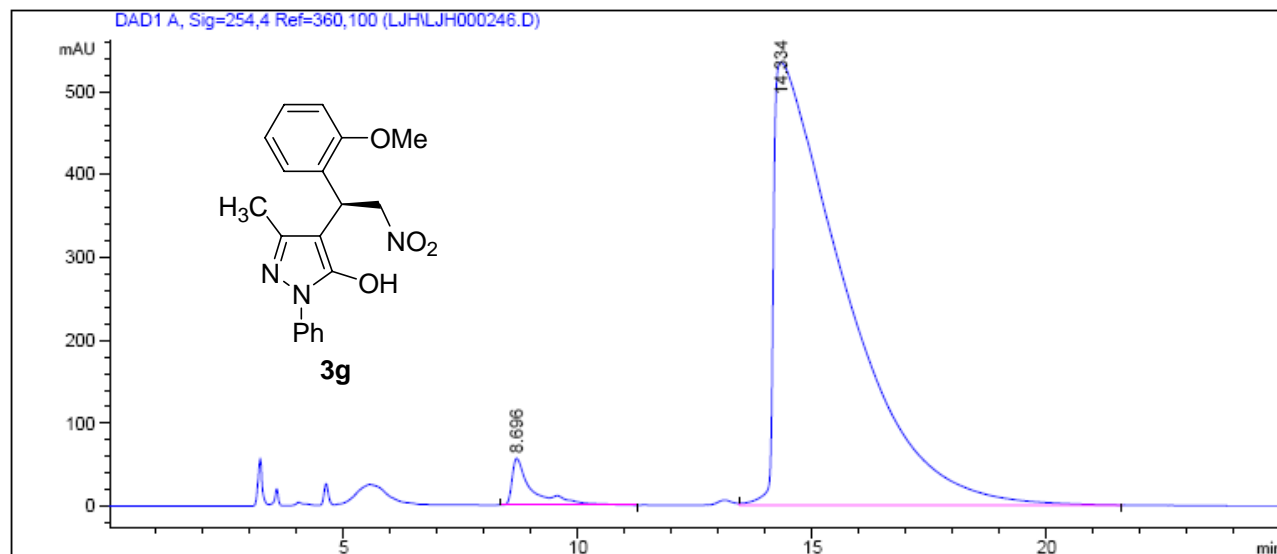

| Peak # | RetTime [min] | Type | Width [min] | Area [mAU*s] | Height [mAU] | Area %  |
|--------|---------------|------|-------------|--------------|--------------|---------|
| 1      | 8.696         | BB S | 0.3991      | 1689.36353   | 56.47823     | 2.9106  |
| 2      | 14.334        | VB   | 1.4148      | 5.63517e4    | 534.14014    | 97.0894 |

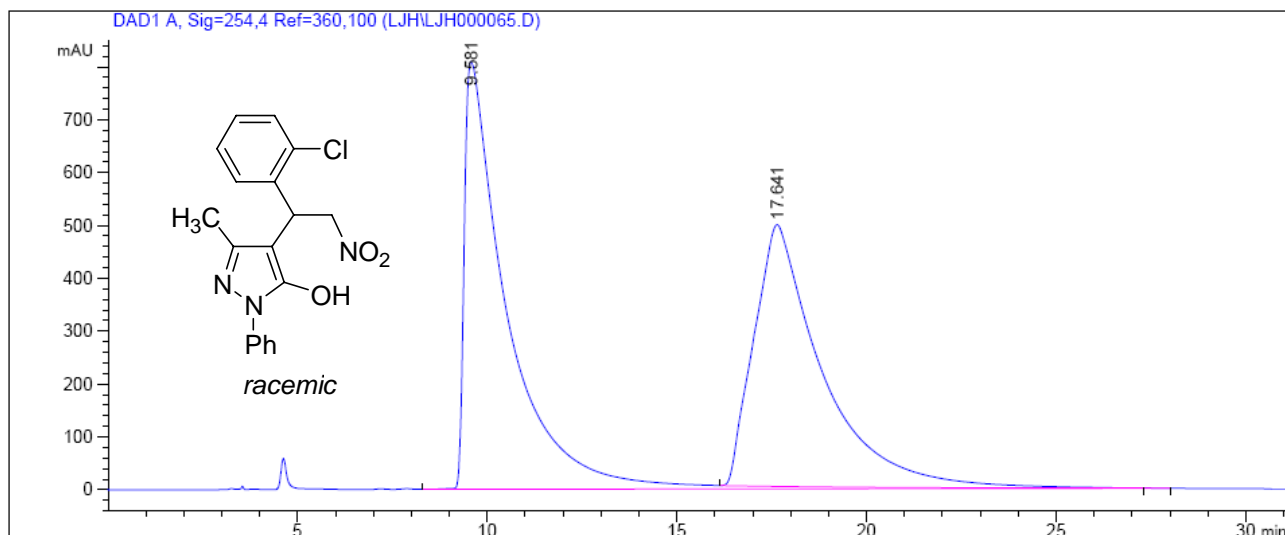

| Peak # | RetTime [min] | Type | Width [min] | Area [mAU*s] | Height [mAU] | Area %  |
|--------|---------------|------|-------------|--------------|--------------|---------|
| 1      | 9.581         | BB S | 1.0779      | 6.39106e4    | 808.80786    | 50.8214 |
| 2      | 17.641        | BB X | 1.6567      | 6.18447e4    | 495.31610    | 49.1786 |

### 3h

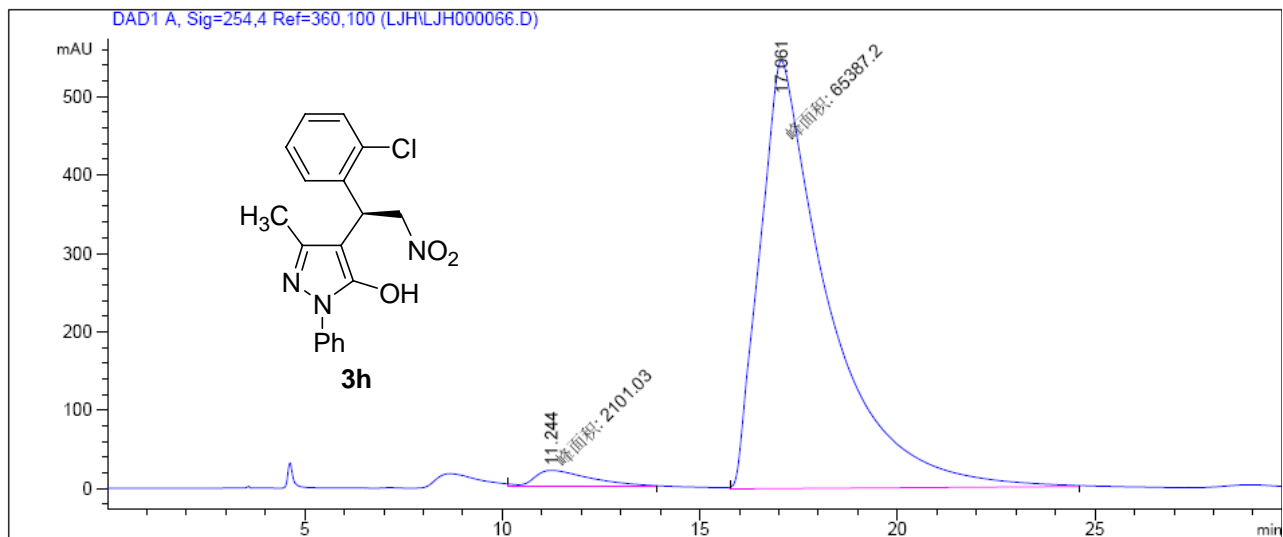

| Peak # | RetTime [min] | Type | Width [min] | Area [mAU*s] | Height [mAU] | Area %  |
|--------|---------------|------|-------------|--------------|--------------|---------|
| 1      | 11.244        | MM T | 1.6075      | 2101.03223   | 20.73529     | 3.1132  |
| 2      | 17.061        | MM T | 1.9951      | 6.53872e4    | 546.24225    | 96.8868 |



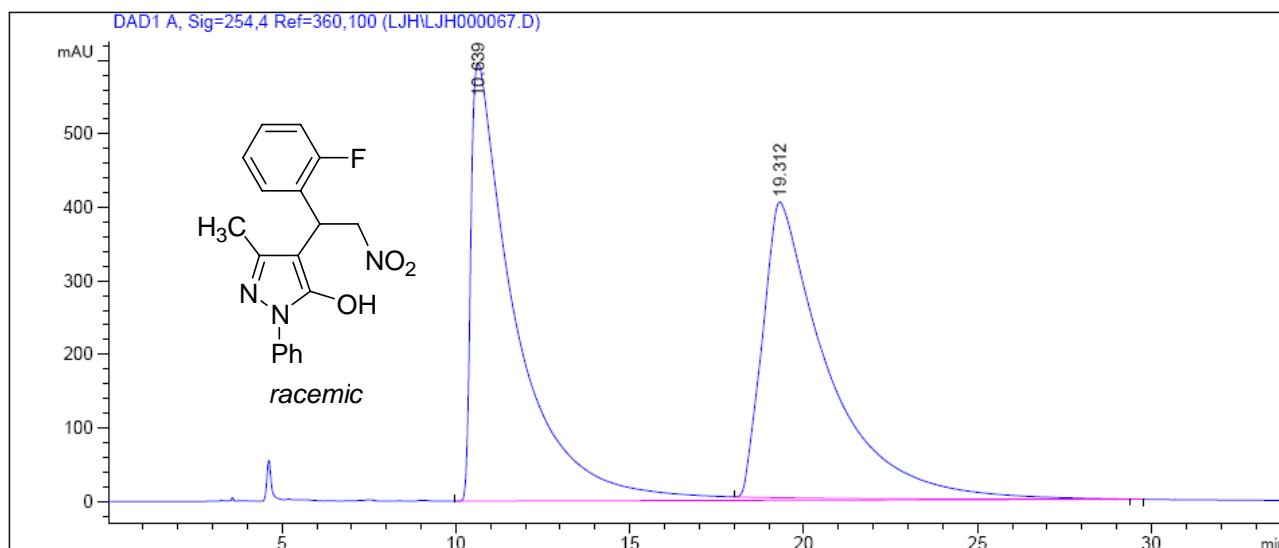

| Peak # | RetTime [min] | Type | Width [min] | Area [mAU*s] | Height [mAU] | Area %  |
|--------|---------------|------|-------------|--------------|--------------|---------|
| 1      | 10.639        | VB S | 1.2010      | 5.35136e4    | 595.17010    | 50.6277 |
| 2      | 19.312        | BB X | 1.7654      | 5.21866e4    | 402.30408    | 49.3723 |

3i

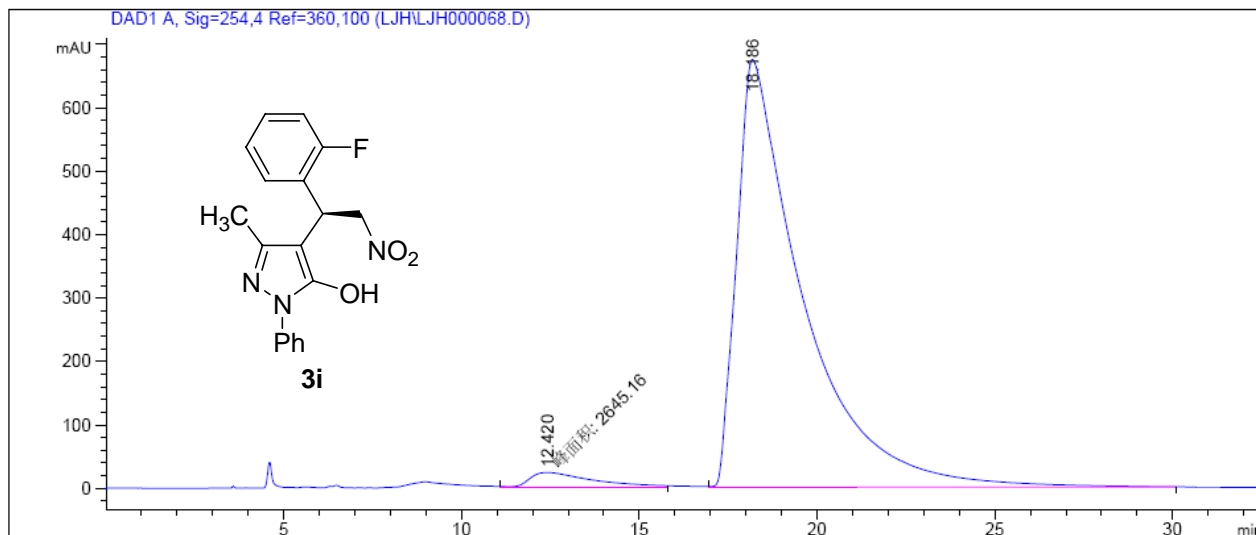

| Peak # | RetTime [min] | Type | Width [min] | Area [mAU*s] | Height [mAU] | Area %  |
|--------|---------------|------|-------------|--------------|--------------|---------|
| 1      | 12.420        | MM T | 1.8259      | 2645.15796   | 22.45601     | 2.9490  |
| 2      | 18.186        | VB S | 1.7025      | 8.70526e4    | 674.16669    | 97.0510 |

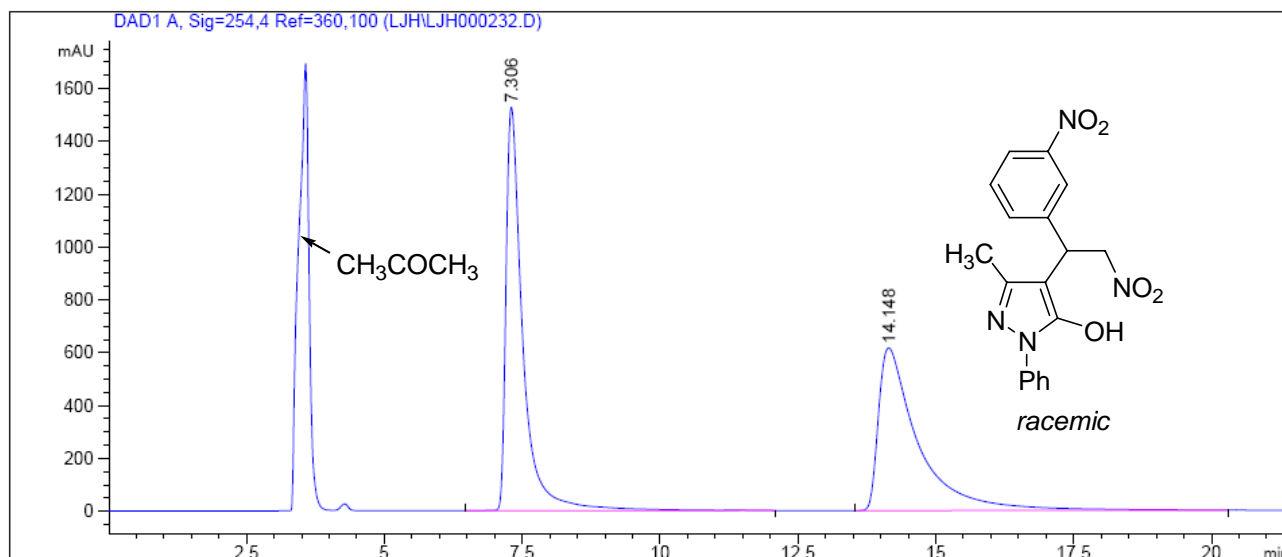

| Peak # | RetTime [min] | Type | Width [min] | Area [mAU*s] | Height [mAU] | Area %  |
|--------|---------------|------|-------------|--------------|--------------|---------|
| 1      | 7.306         | BB S | 0.3127      | 3.25764e4    | 1526.50012   | 51.1556 |
| 2      | 14.148        | BB   | 0.7175      | 3.11046e4    | 615.54846    | 48.8444 |

3j

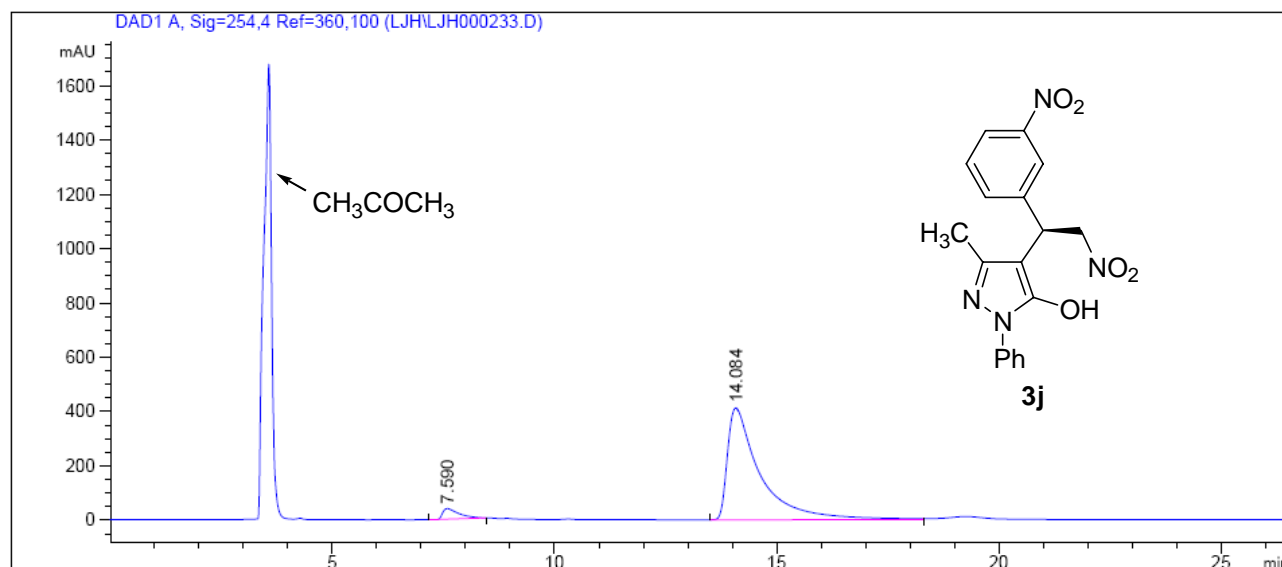

| Peak # | RetTime [min] | Type | Width [min] | Area [mAU*s] | Height [mAU] | Area %  |
|--------|---------------|------|-------------|--------------|--------------|---------|
| 1      | 7.590         | BB S | 0.3674      | 991.44727    | 39.15594     | 4.4724  |
| 2      | 14.084        | BB   | 0.7235      | 2.11767e4    | 412.08752    | 95.5276 |

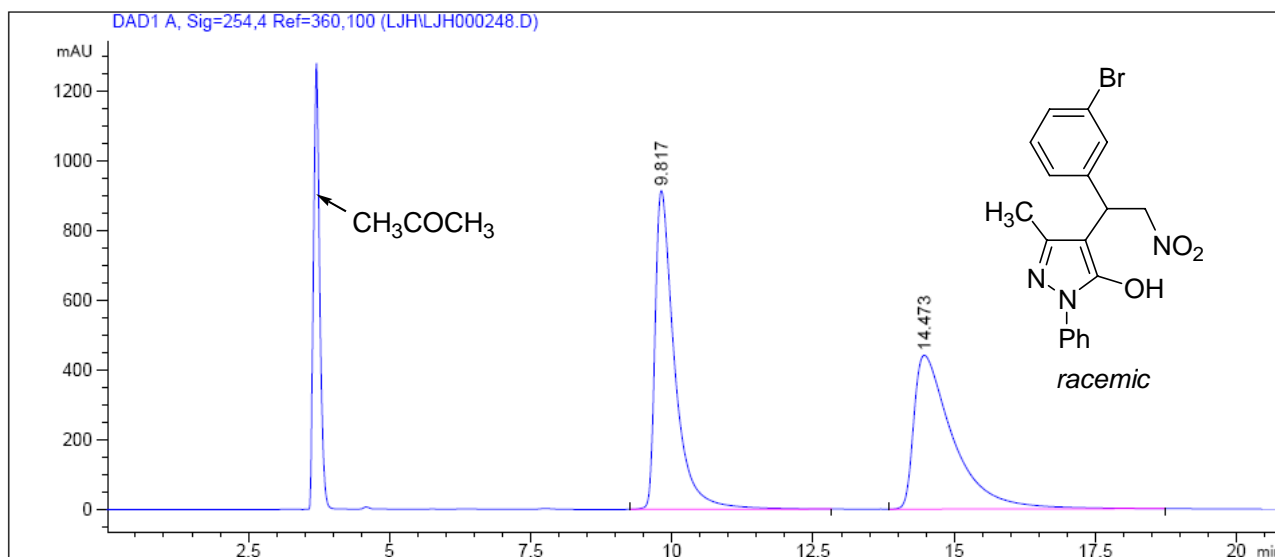

| Peak # | RetTime [min] | Type | Width [min] | Area [mAU*s] | Height [mAU] | Area %  |
|--------|---------------|------|-------------|--------------|--------------|---------|
| 1      | 9.817         | BB S | 0.3524      | 2.19941e4    | 915.25928    | 50.7388 |
| 2      | 14.473        | BB   | 0.7115      | 2.13536e4    | 442.13046    | 49.2612 |

**3k**

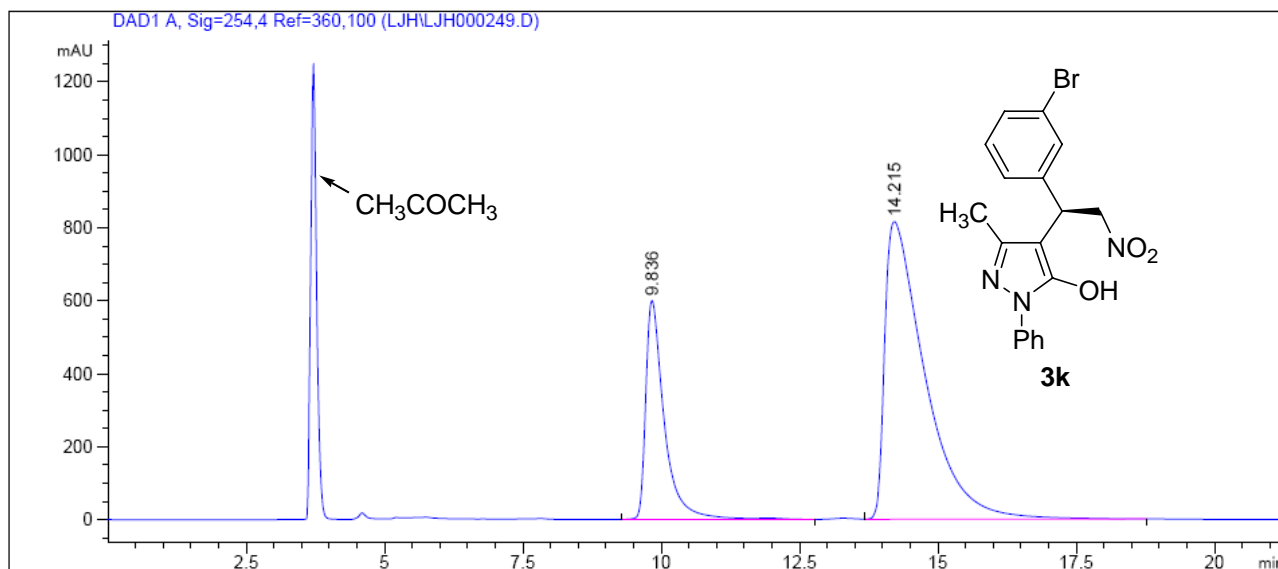

| Peak # | RetTime [min] | Type | Width [min] | Area [mAU*s] | Height [mAU] | Area %  |
|--------|---------------|------|-------------|--------------|--------------|---------|
| 1      | 9.836         | BB S | 0.3440      | 1.40600e4    | 600.09302    | 25.4354 |
| 2      | 14.215        | VB   | 0.7413      | 4.12171e4    | 816.05420    | 74.5646 |

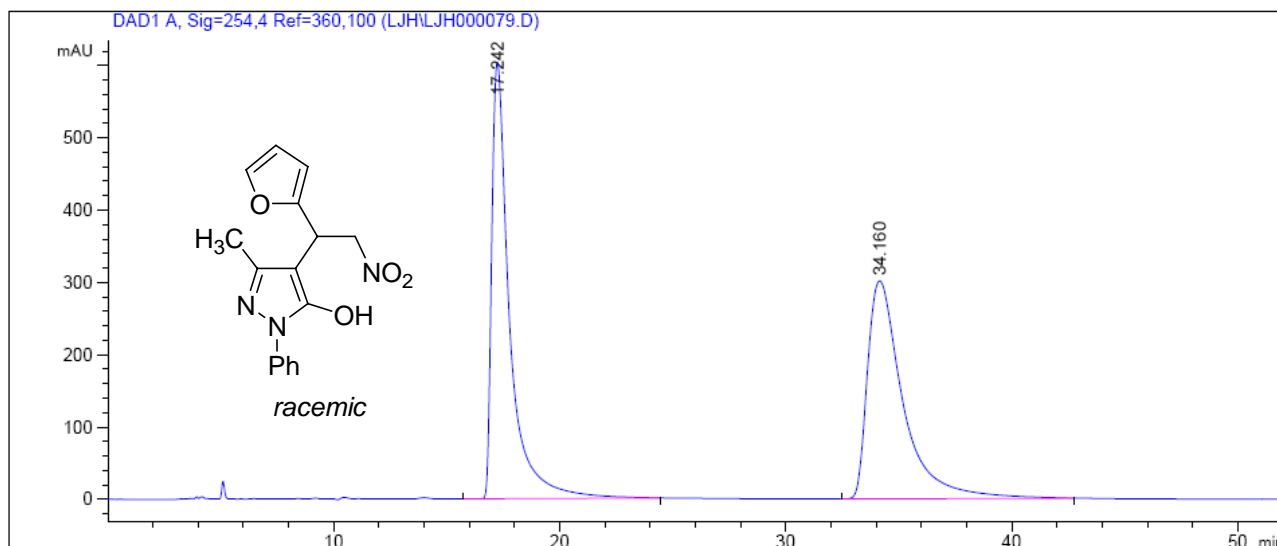

| Peak # | RetTime [min] | Type | Width [min] | Area [mAU*s] | Height [mAU] | Area %  |
|--------|---------------|------|-------------|--------------|--------------|---------|
| 1      | 17.242        | BB   | 0.8159      | 3.32998e4    | 603.31097    | 50.2256 |
| 2      | 34.160        | BB   | 1.6297      | 3.30007e4    | 301.33463    | 49.7744 |

31

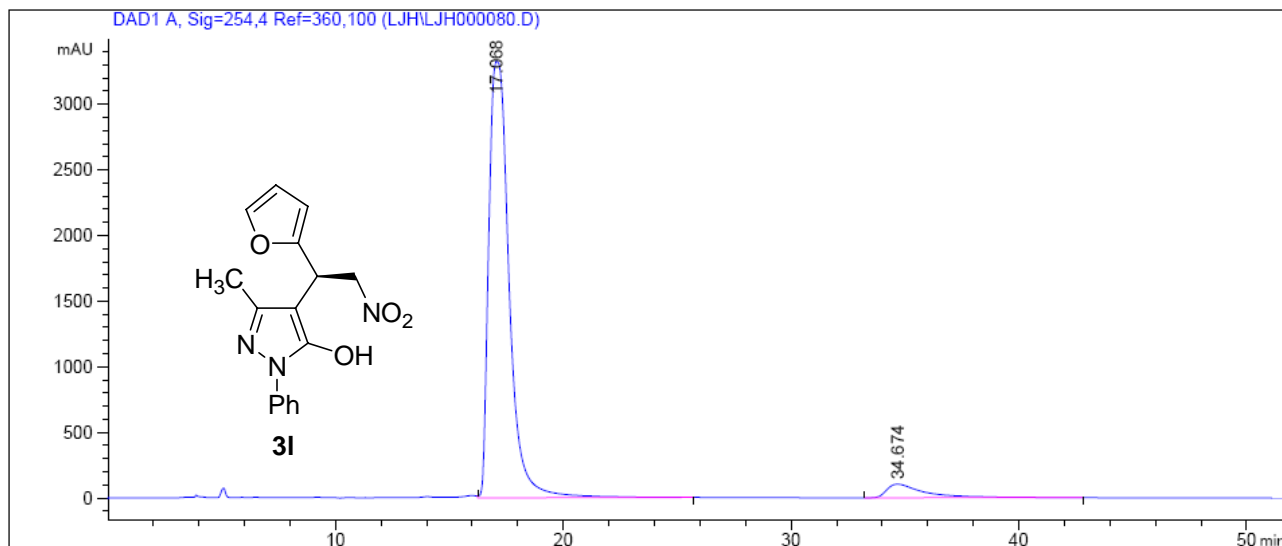

| Peak # | RetTime [min] | Type | Width [min] | Area [mAU*s] | Height [mAU] | Area %  |
|--------|---------------|------|-------------|--------------|--------------|---------|
| 1      | 17.068        | VB S | 0.8591      | 2.06270e5    | 3327.84619   | 94.4360 |
| 2      | 34.674        | BB   | 1.6857      | 1.21530e4    | 103.51668    | 5.5640  |

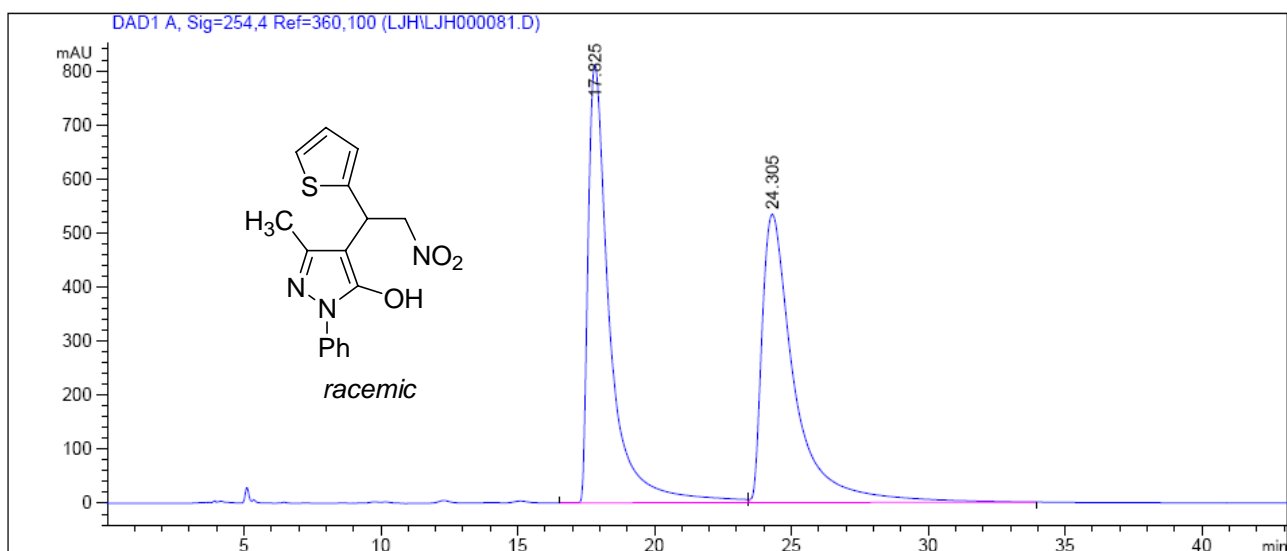

| Peak # | RetTime [min] | Type | Width [min] | Area [mAU*s] | Height [mAU] | Area %  |
|--------|---------------|------|-------------|--------------|--------------|---------|
| 1      | 17.825        | BV   | 0.8148      | 4.46478e4    | 810.28503    | 50.4421 |
| 2      | 24.305        | VB   | 1.2279      | 4.38652e4    | 533.12964    | 49.5579 |

### 3m

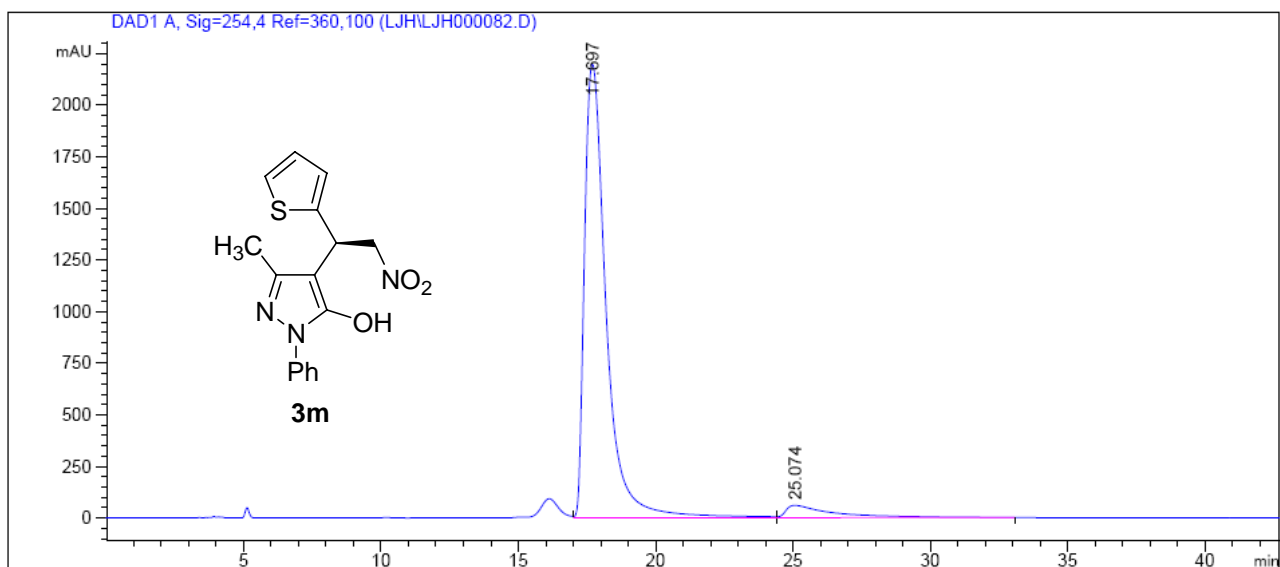

| Peak # | RetTime [min] | Type | Width [min] | Area [mAU*s] | Height [mAU] | Area %  |
|--------|---------------|------|-------------|--------------|--------------|---------|
| 1      | 17.697        | VV T | 0.8396      | 1.20533e5    | 2198.68555   | 94.3267 |
| 2      | 25.074        | VB T | 1.6278      | 7249.53760   | 59.90956     | 5.6733  |

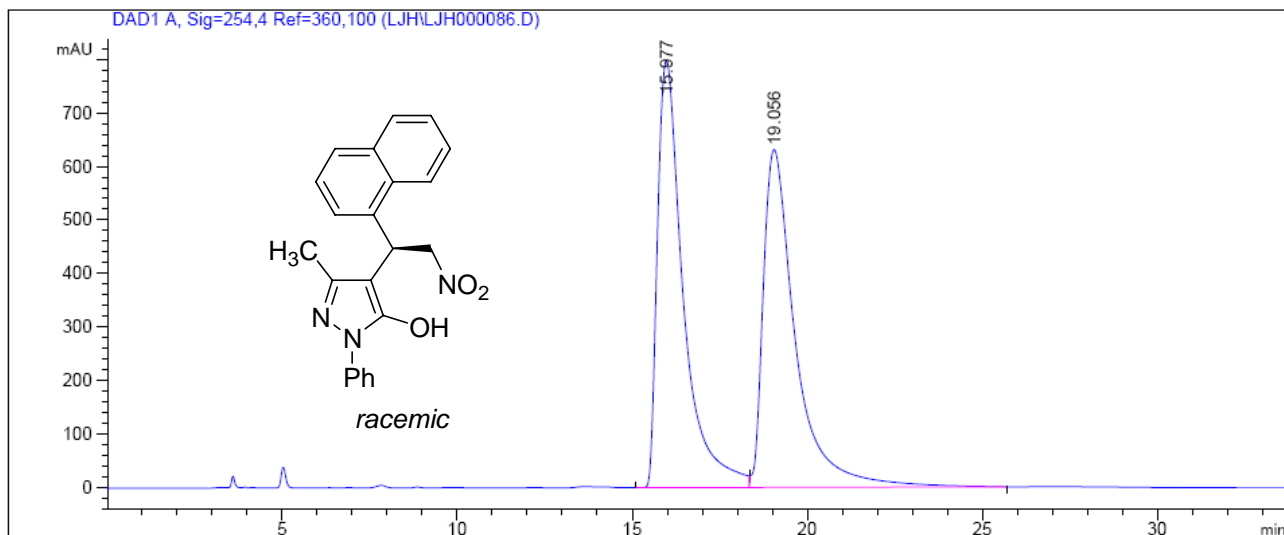

| Peak # | RetTime [min] | Type | Width [min] | Area [mAU*s] | Height [mAU] | Area %  |
|--------|---------------|------|-------------|--------------|--------------|---------|
| 1      | 15.977        | BV   | 0.7716      | 4.09990e4    | 797.79510    | 50.3221 |
| 2      | 19.056        | VB   | 0.9644      | 4.04743e4    | 630.97375    | 49.6779 |

### 3n

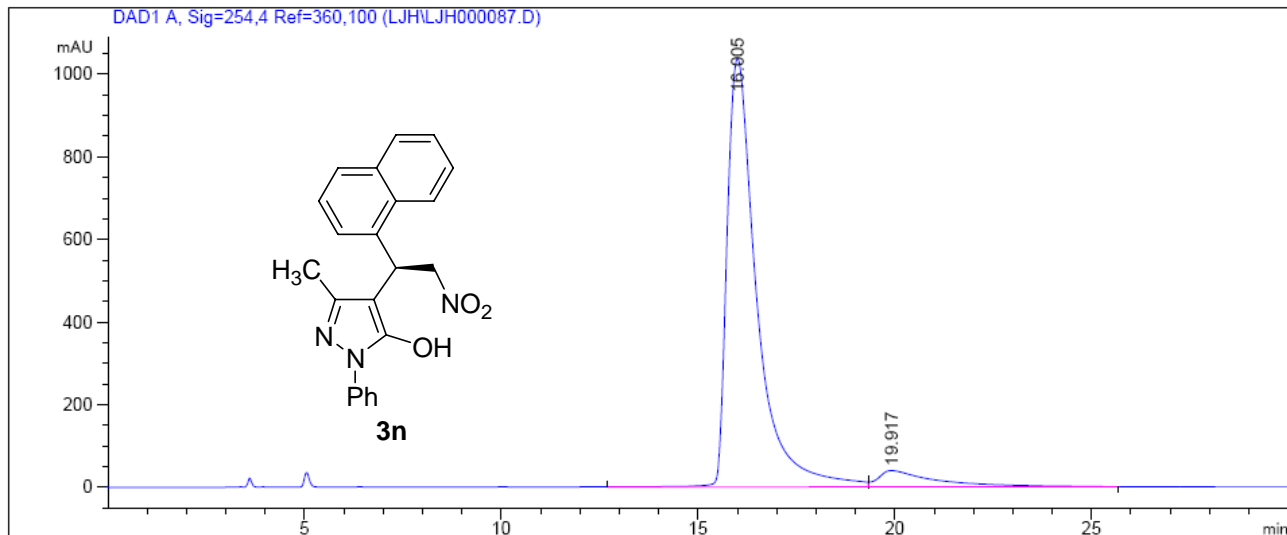

| Peak # | RetTime [min] | Type | Width [min] | Area [mAU*s] | Height [mAU] | Area %  |
|--------|---------------|------|-------------|--------------|--------------|---------|
| 1      | 16.005        | VV   | 0.7801      | 5.44174e4    | 1037.15747   | 93.1134 |
| 2      | 19.917        | VB   | 1.3870      | 4024.69189   | 39.42617     | 6.8866  |

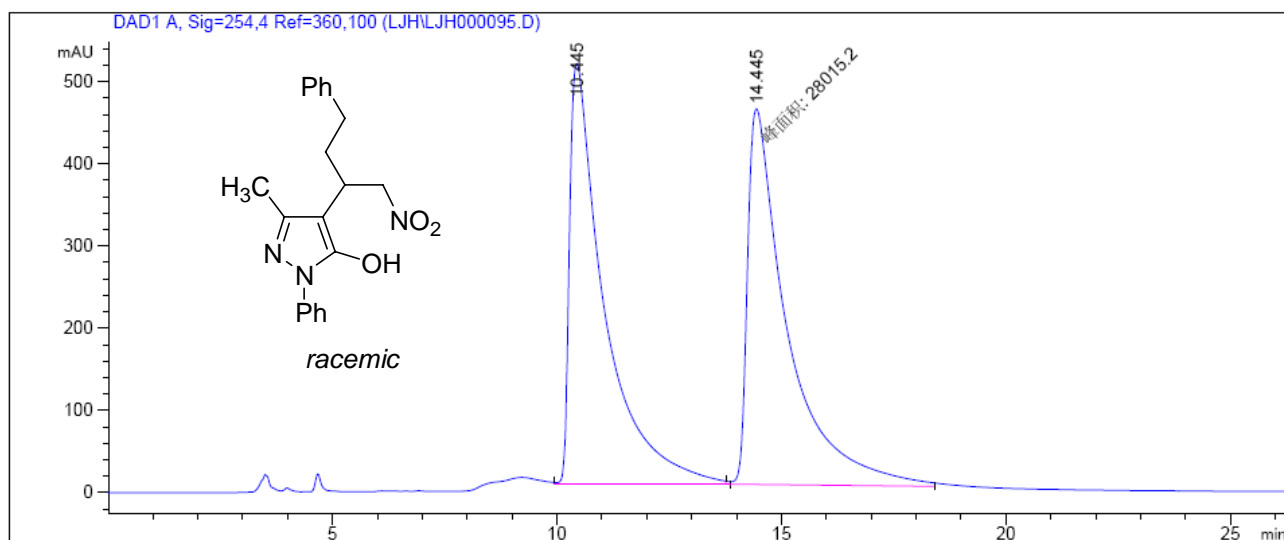

| Peak # | RetTime [min] | Type | Width [min] | Area [mAU*s] | Height [mAU] | Area %  |
|--------|---------------|------|-------------|--------------|--------------|---------|
| 1      | 10.445        | MM R | 0.8368      | 2.73709e4    | 511.64197    | 49.4184 |
| 2      | 14.445        | MM T | 0.9855      | 2.80152e4    | 457.03885    | 50.5816 |

30

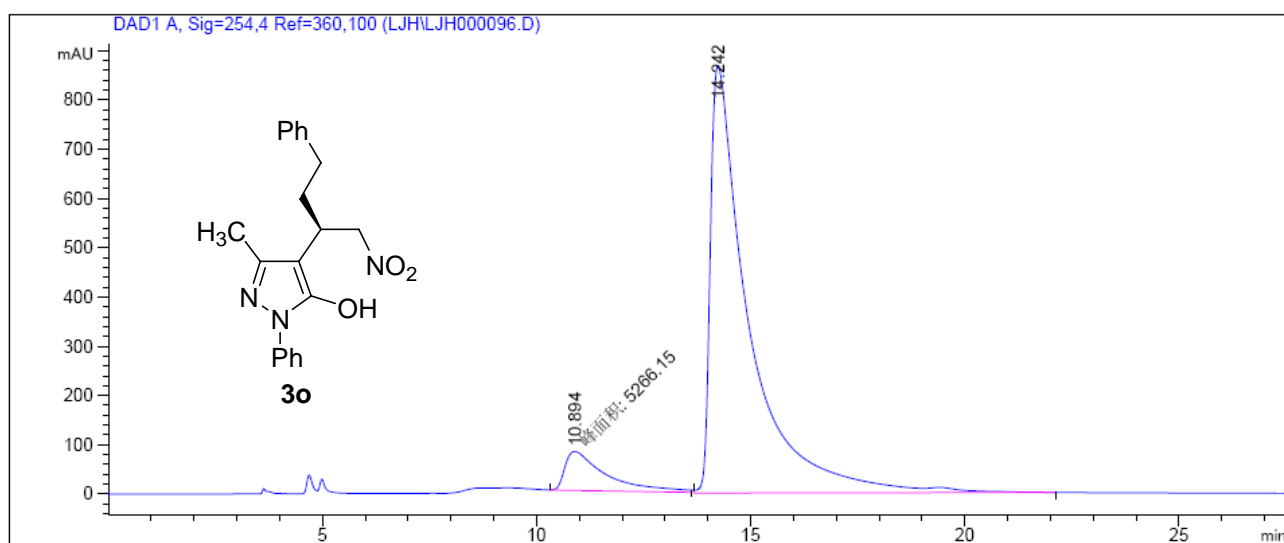

| Peak # | RetTime [min] | Type | Width [min] | Area [mAU*s] | Height [mAU] | Area %  |
|--------|---------------|------|-------------|--------------|--------------|---------|
| 1      | 10.894        | MM   | 1.1049      | 5266.15430   | 79.43681     | 8.8590  |
| 2      | 14.242        | VB S | 0.8581      | 5.41782e4    | 868.11761    | 91.1410 |

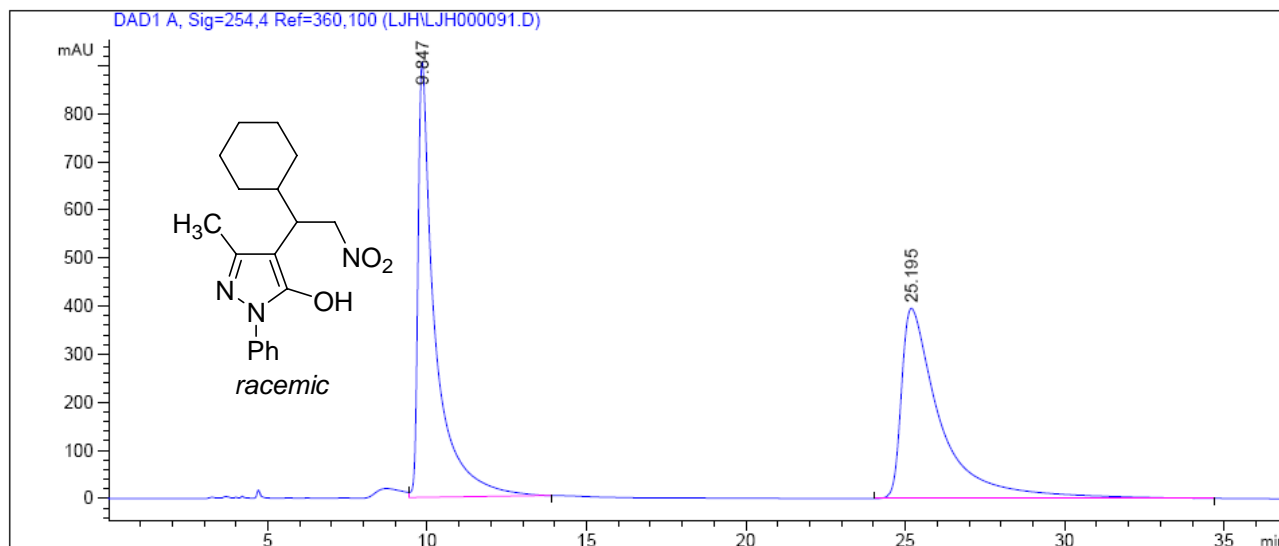

| Peak # | RetTime [min] | Type | Width [min] | Area [mAU*s] | Height [mAU] | Area %  |
|--------|---------------|------|-------------|--------------|--------------|---------|
| 1      | 9.847         | VB S | 0.5070      | 3.34619e4    | 905.70752    | 49.7625 |
| 2      | 25.195        | BB   | 1.2004      | 3.37812e4    | 395.52261    | 50.2375 |

**3p**

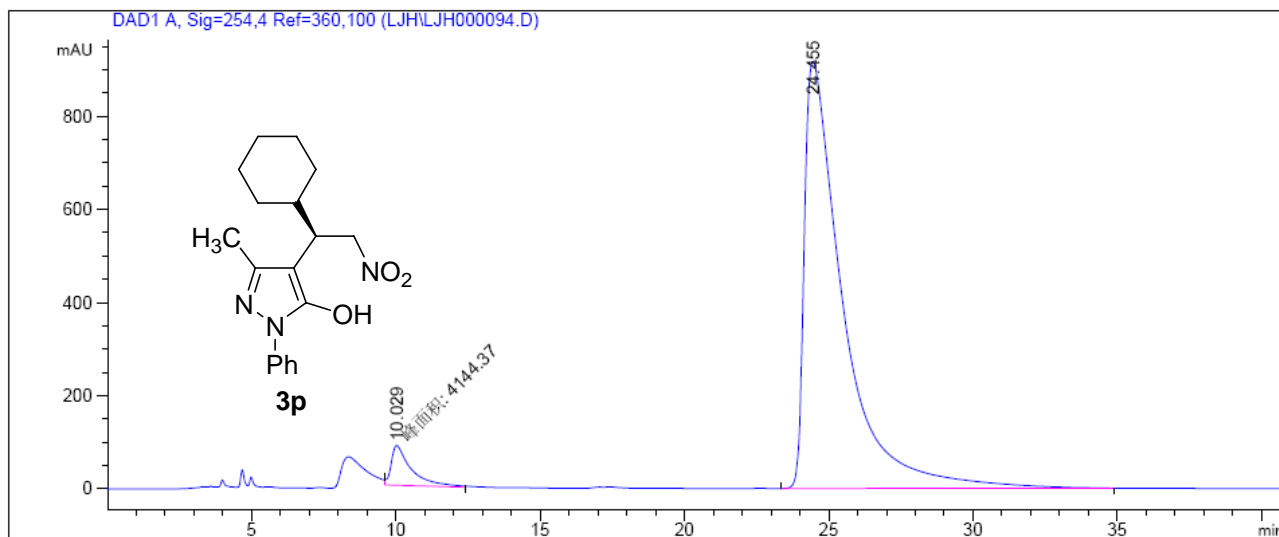

| Peak # | RetTime [min] | Type | Width [min] | Area [mAU*s] | Height [mAU] | Area %  |
|--------|---------------|------|-------------|--------------|--------------|---------|
| 1      | 10.029        | MM T | 0.8091      | 4144.37158   | 85.37071     | 4.6402  |
| 2      | 24.455        | BB   | 1.3317      | 8.51696e4    | 916.88892    | 95.3598 |



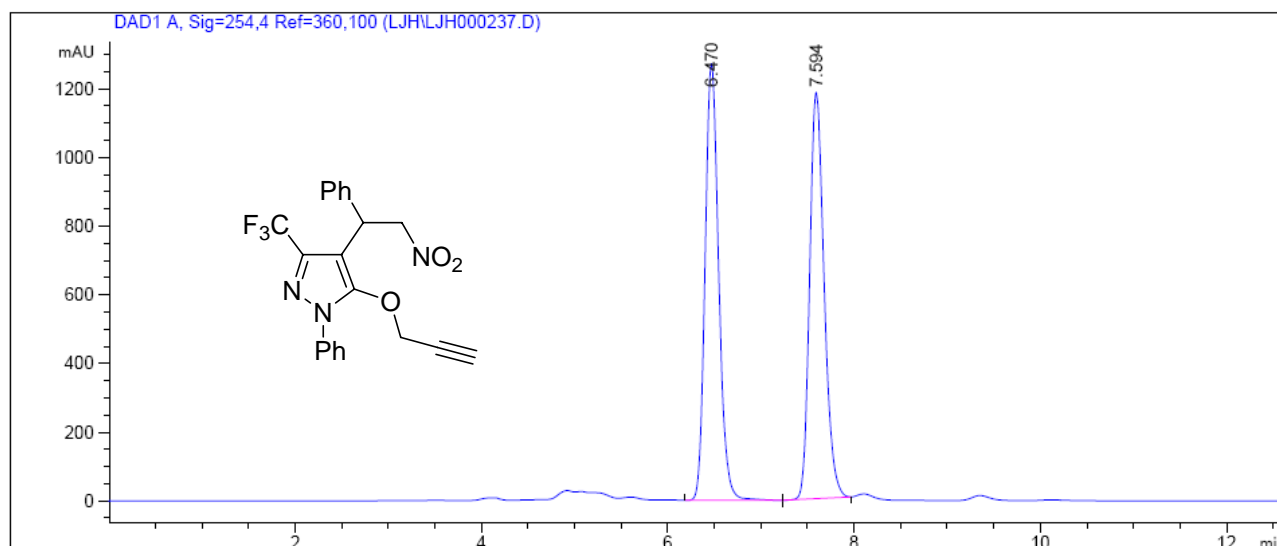

| Peak # | RetTime [min] | Type | Width [min] | Area [mAU*s] | Height [mAU] | Area %  |
|--------|---------------|------|-------------|--------------|--------------|---------|
| 1      | 6.470         | BB   | 0.1581      | 1.28592e4    | 1270.05566   | 50.1919 |
| 2      | 7.594         | BB S | 0.1659      | 1.27609e4    | 1182.16187   | 49.8081 |

**3q** was determined by its propargyloxy derivative

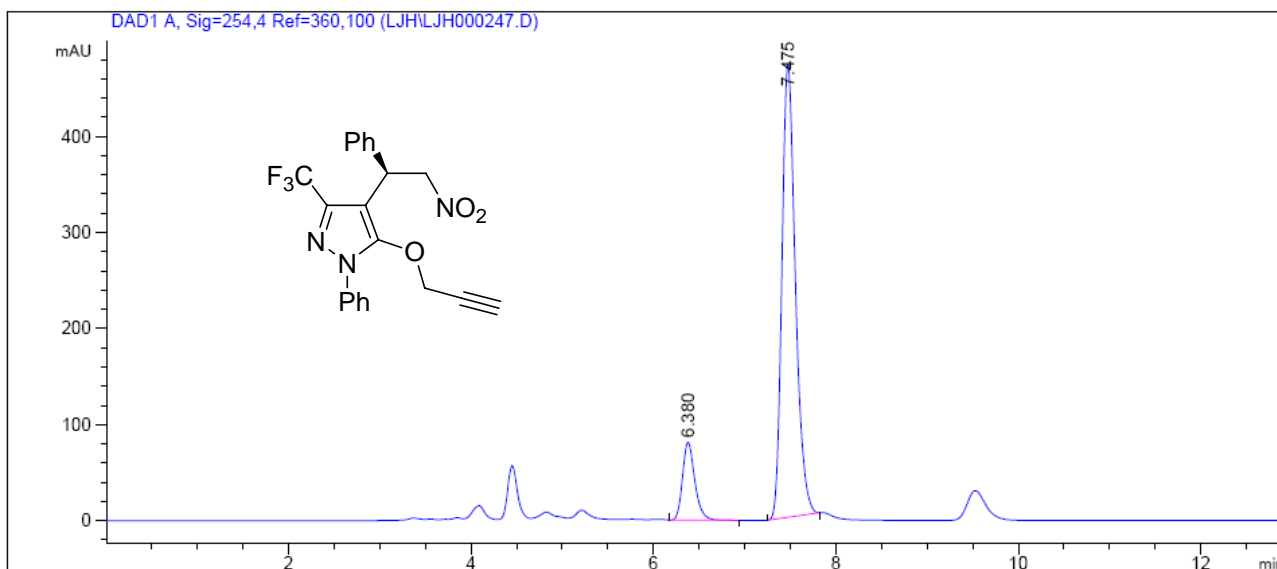

| Peak # | RetTime [min] | Type | Width [min] | Area [mAU*s] | Height [mAU] | Area %  |
|--------|---------------|------|-------------|--------------|--------------|---------|
| 1      | 6.380         | BB   | 0.1452      | 758.12915    | 80.97334     | 13.5595 |
| 2      | 7.475         | BB S | 0.1596      | 4832.99805   | 471.59232    | 86.4405 |

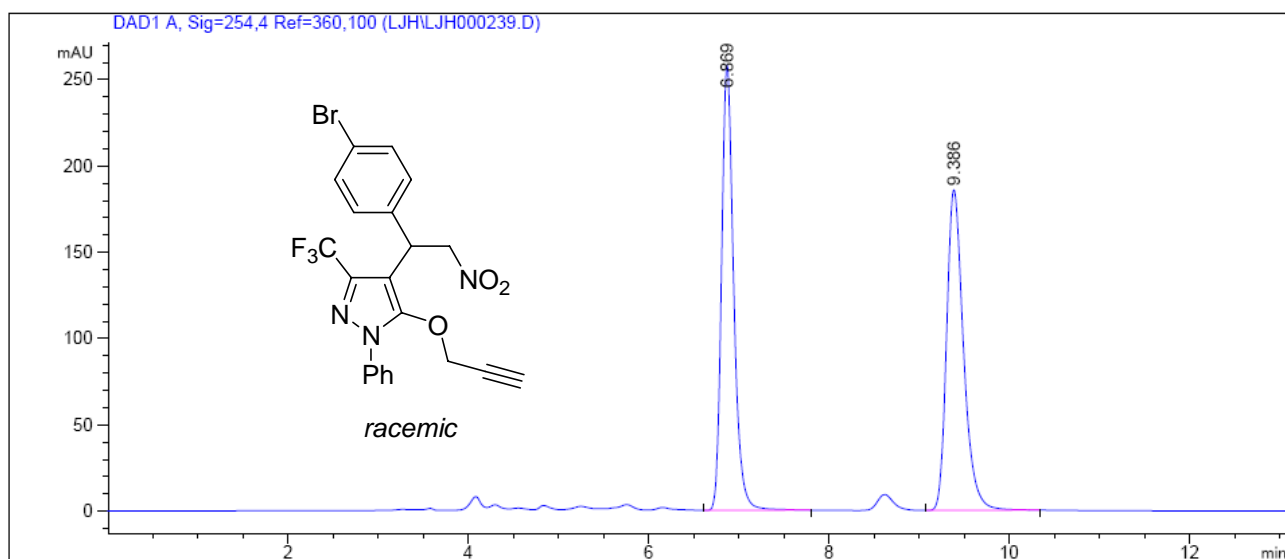

| Peak # | RetTime [min] | Type | Width [min] | Area [mAU*s] | Height [mAU] | Area %  |
|--------|---------------|------|-------------|--------------|--------------|---------|
| 1      | 6.869         | BB S | 0.1454      | 2415.68262   | 257.63870    | 50.0040 |
| 2      | 9.386         | VB S | 0.1999      | 2415.29932   | 185.51678    | 49.9960 |

Compound **3r** was determined by its propargyloxy derivative

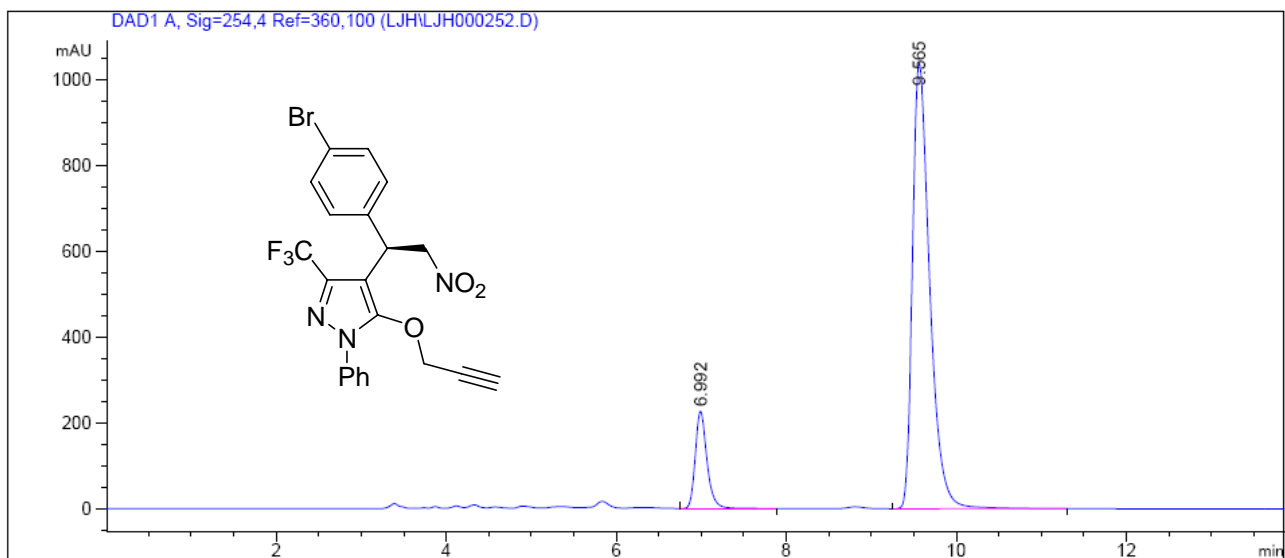

| Peak # | RetTime [min] | Type | Width [min] | Area [mAU*s] | Height [mAU] | Area %  |
|--------|---------------|------|-------------|--------------|--------------|---------|
| 1      | 6.992         | BB S | 0.1477      | 2163.94043   | 225.93787    | 12.8928 |
| 2      | 9.565         | VB S | 0.2165      | 1.46201e4    | 1036.99011   | 87.1072 |

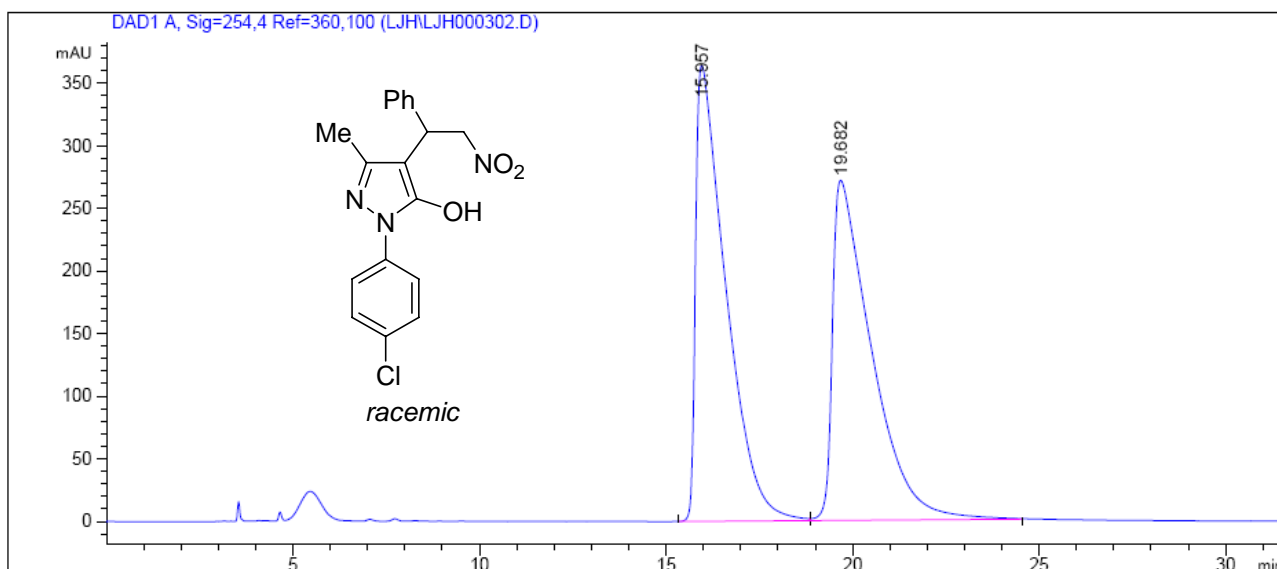

| Peak # | RetTime [min] | Type | Width [min] | Area [mAU*s] | Height [mAU] | Area %  |
|--------|---------------|------|-------------|--------------|--------------|---------|
| 1      | 15.957        | BV   | 0.8166      | 2.04805e4    | 363.92163    | 50.9157 |
| 2      | 19.682        | VB   | 1.0004      | 1.97438e4    | 271.50012    | 49.0843 |

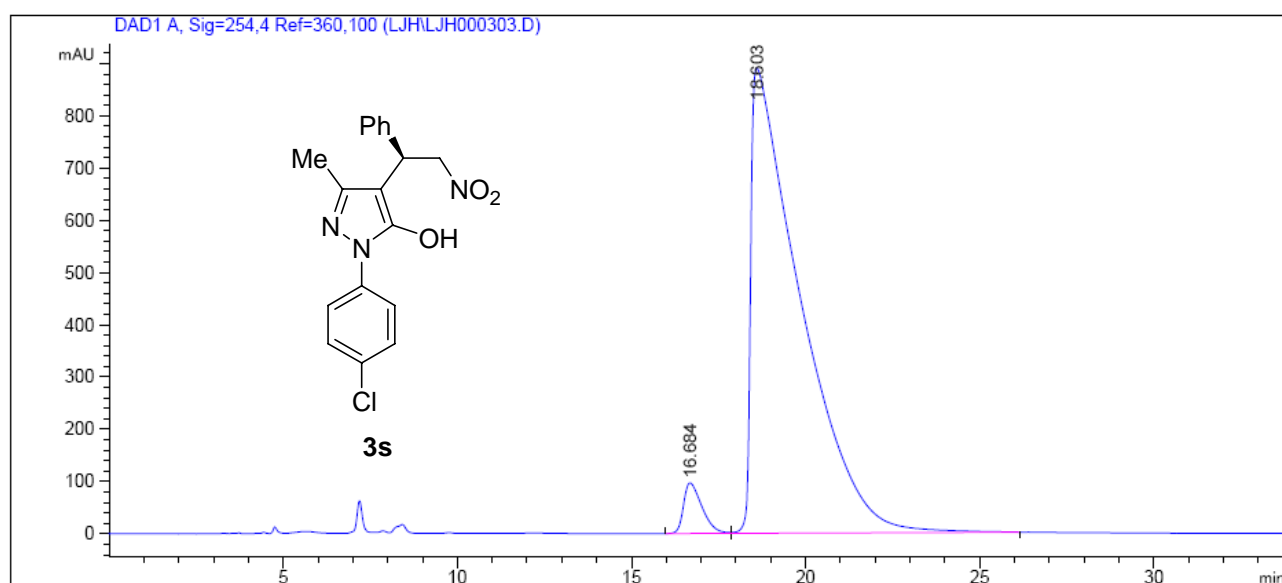

| Peak # | RetTime [min] | Type | Width [min] | Area [mAU*s] | Height [mAU] | Area %  |
|--------|---------------|------|-------------|--------------|--------------|---------|
| 1      | 16.684        | BV   | 0.5613      | 3562.41260   | 96.80896     | 3.8914  |
| 2      | 18.603        | VB   | 1.3653      | 8.79823e4    | 890.03815    | 96.1086 |

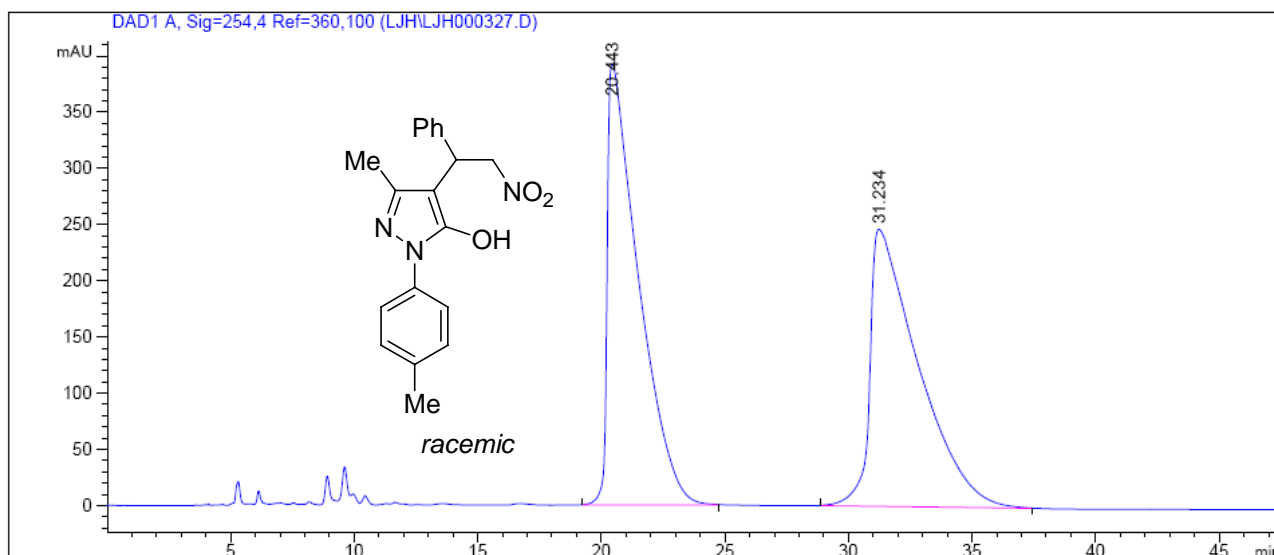

| Peak # | RetTime [min] | Type | Width [min] | Area [mAU*s] | Height [mAU] | Area %  |
|--------|---------------|------|-------------|--------------|--------------|---------|
| 1      | 20.443        | BB   | 1.1865      | 3.43361e4    | 392.54123    | 50.5021 |
| 2      | 31.234        | BB   | 1.7950      | 3.36533e4    | 246.77774    | 49.4979 |

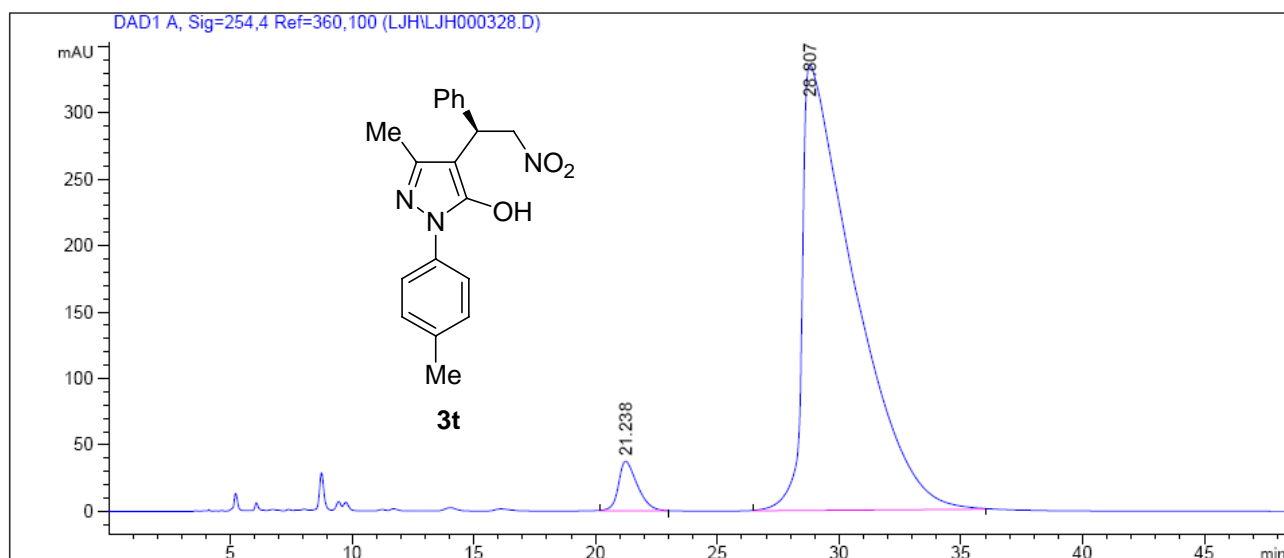

| Peak # | RetTime [min] | Type | Width [min] | Area [mAU*s] | Height [mAU] | Area %  |
|--------|---------------|------|-------------|--------------|--------------|---------|
| 1      | 21.238        | BB   | 0.8216      | 2008.24744   | 37.21607     | 3.8791  |
| 2      | 28.807        | BB   | 1.8826      | 4.97624e4    | 335.46152    | 96.1209 |

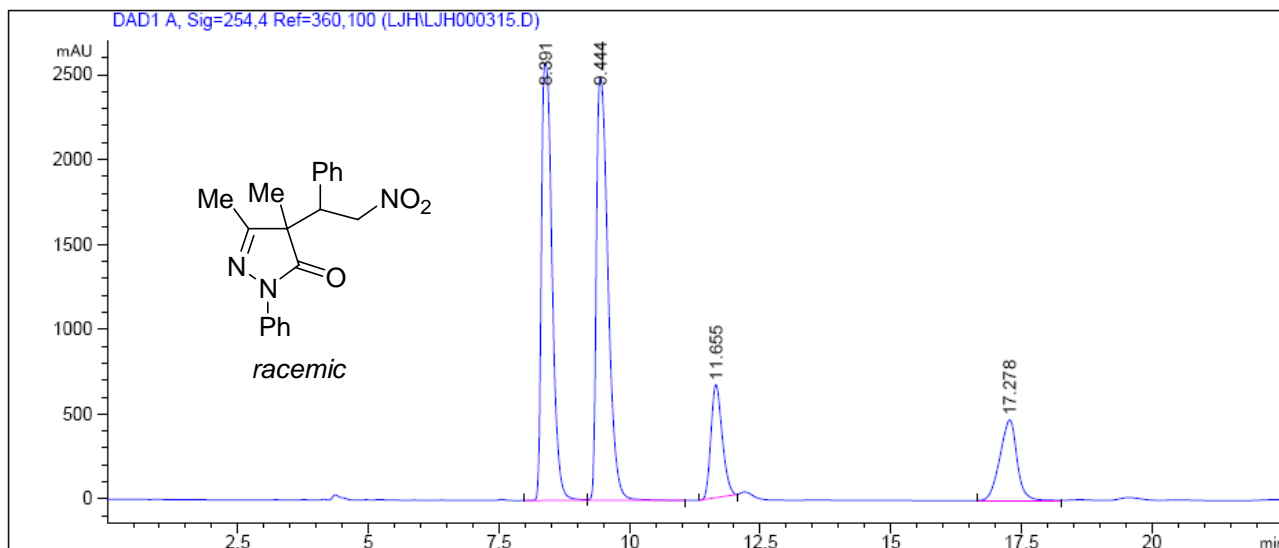

| Peak # | RetTime [min] | Type | Width [min] | Area [mAU*s] | Height [mAU] | Area %  |
|--------|---------------|------|-------------|--------------|--------------|---------|
| 1      | 8.391         | BV   | 0.2228      | 3.64304e4    | 2579.44482   | 38.0220 |
| 2      | 9.444         | VB S | 0.2406      | 3.85249e4    | 2488.85913   | 40.2081 |
| 3      | 11.655        | BB   | 0.2312      | 9992.22559   | 665.48059    | 10.4288 |
| 4      | 17.278        | BV   | 0.3507      | 1.08663e4    | 475.34451    | 11.3411 |

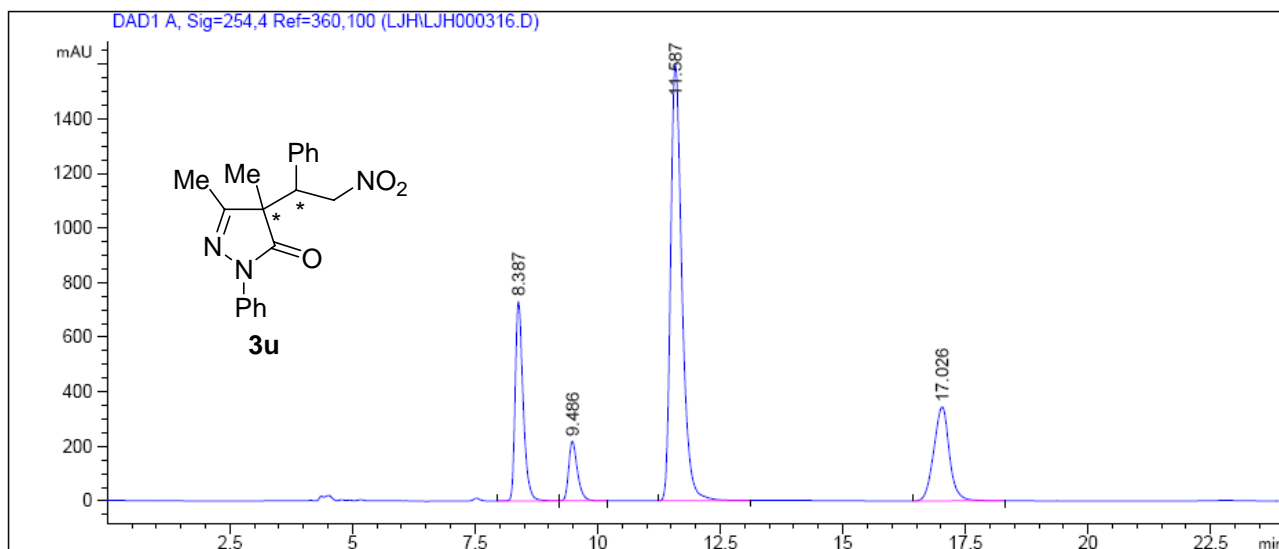

| Peak # | RetTime [min] | Type | Width [min] | Area [mAU*s] | Height [mAU] | Area %  |
|--------|---------------|------|-------------|--------------|--------------|---------|
| 1      | 8.387         | BV   | 0.1712      | 8222.27246   | 731.02222    | 18.6108 |
| 2      | 9.486         | VB S | 0.1890      | 2706.95142   | 217.76132    | 6.1271  |
| 3      | 11.587        | BB   | 0.2449      | 2.56494e4    | 1601.27661   | 58.0564 |
| 4      | 17.026        | BB   | 0.3374      | 7601.47656   | 344.50128    | 17.2057 |

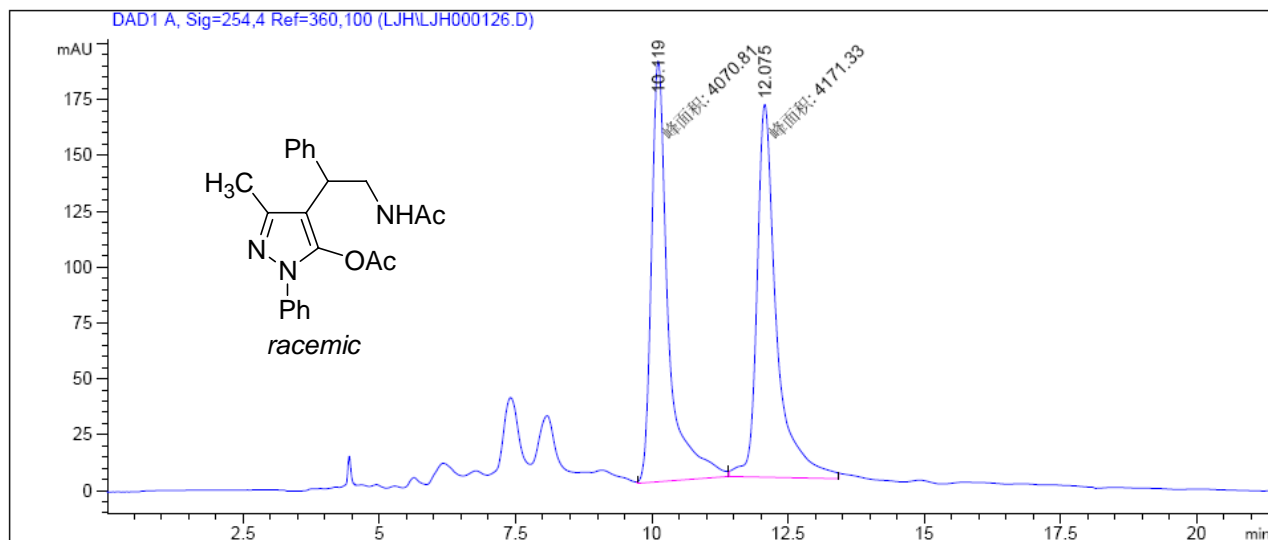

| Peak # | RetTime [min] | Type | Width [min] | Area [mAU*s] | Height [mAU] | Area %  |
|--------|---------------|------|-------------|--------------|--------------|---------|
| 1      | 10.119        | MM T | 0.3602      | 4070.81152   | 188.36588    | 49.3902 |
| 2      | 12.075        | MM T | 0.4166      | 4171.32764   | 166.86177    | 50.6098 |

Compound **4** was determined by its acetyl derivative

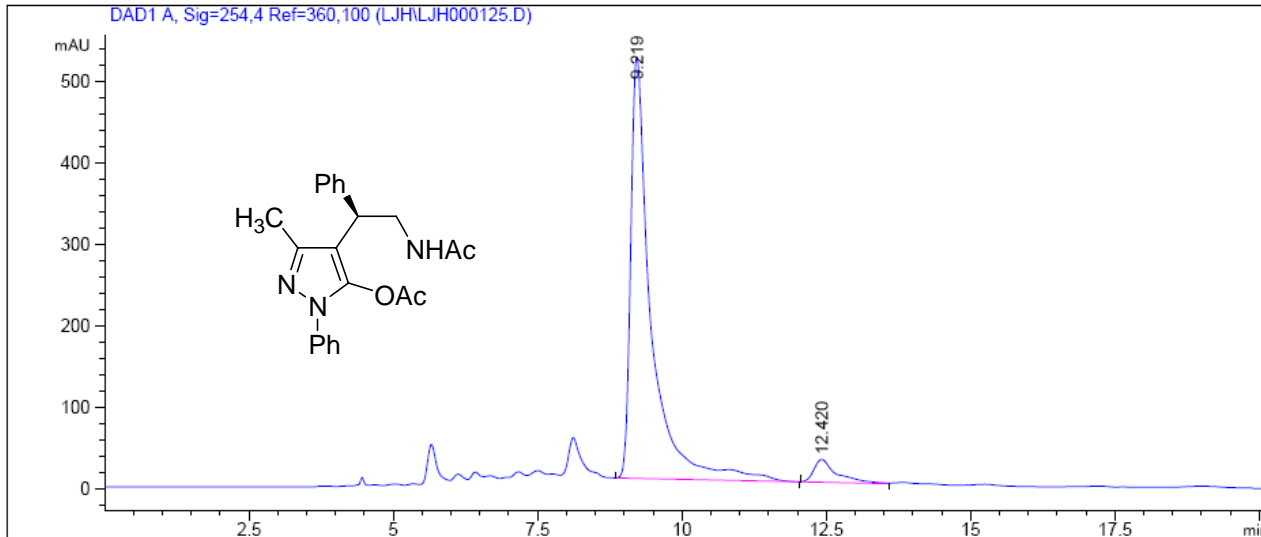

| Peak # | RetTime [min] | Type | Width [min] | Area [mAU*s] | Height [mAU] | Area %  |
|--------|---------------|------|-------------|--------------|--------------|---------|
| 1      | 9.219         | BB S | 0.3450      | 1.26902e4    | 517.01080    | 94.3021 |
| 2      | 12.420        | BV   | 0.3917      | 766.77008    | 27.97937     | 5.6979  |

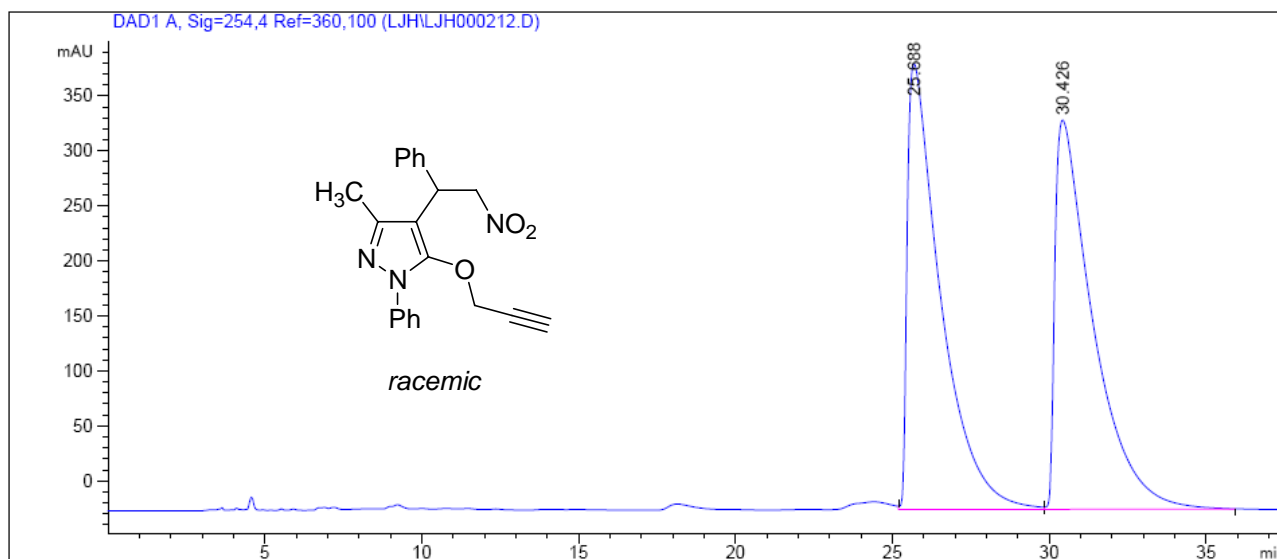

| Peak # | RetTime [min] | Type | Width [min] | Area [mAU*s] | Height [mAU] | Area %  |
|--------|---------------|------|-------------|--------------|--------------|---------|
| 1      | 25.688        | VV   | 1.0673      | 2.98607e4    | 405.40359    | 50.1459 |
| 2      | 30.426        | VB   | 1.2107      | 2.96869e4    | 353.88205    | 49.8541 |

5

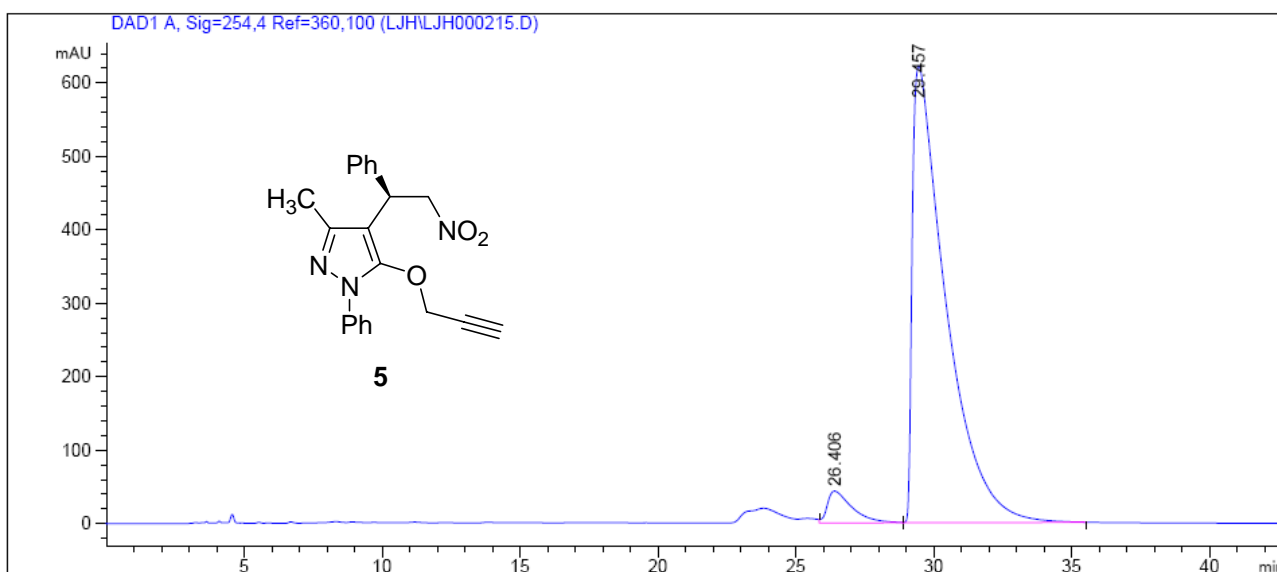

| Peak # | RetTime [min] | Type | Width [min] | Area [mAU*s] | Height [mAU] | Area %  |
|--------|---------------|------|-------------|--------------|--------------|---------|
| 1      | 26.406        | VV   | 0.9159      | 2682.06909   | 43.22739     | 4.8511  |
| 2      | 29.457        | VB   | 1.2027      | 5.26054e4    | 622.00244    | 95.1489 |
